# Supplementary material for: Palladium-catalyzed enantioselective domino ring-opening/Hiyama coupling of cyclobutanones: development and application to the synthesis of (+)-herbertene-1,14-diol
Source: Royal Society of Chemistry journal article supplement (doi:10.1039/d2qo01239a), 2022-01-01

## Supporting Information

### **Palladium-catalyzed enantioselective domino ring-opening/Hiyama coupling of cyclobutanones: Development and application to the synthesis of (+)-herbertene-1,14-diol**

Wan-Er Gan,<sup>1</sup> Jian Cao\*<sup>1</sup> and Li-Wen Xu\*<sup>1,2</sup>

<sup>1</sup>Key Laboratory of Organosilicon Chemistry and Material Technology of Ministry of Education, Key Laboratory of Organosilicon Material Technology of Zhejiang Province, College of Material, Chemistry and Chemical Engineering, Hangzhou Normal University, Hangzhou, 311121, Zhejiang, P. R. China

<sup>2</sup>State Key Laboratory for Oxo Synthesis and Selective Oxidation, Suzhou Research Institute and Lanzhou Institute of Chemical Physics, Chinese Academy of Sciences, P. R. China

E-mail: [caojian@hznu.edu.cn](mailto:caojian@hznu.edu.cn); [liwenxu@hznu.edu.cn](mailto:liwenxu@hznu.edu.cn)

| <b>Table of Contents</b>                            |         |
|-----------------------------------------------------|---------|
| General information                                 | S2      |
| <b>Table S1</b> Optimization of reaction conditions | S3      |
| Synthesis of <b>3</b>                               | S4-S28  |
| Synthesis of (+)-herbertene-1,14-diol               | S29-S36 |
| References                                          | S37     |
| NMR spectra                                         | S38-S63 |

## General information

Unless otherwise noted, all reactions were carried out under N<sub>2</sub> atmosphere. All reagents were from commercial sources and used as received without further purification. All solvents were dried by standard techniques and distilled prior to use. Column chromatography was performed on silica gel (300-400 meshes) using petroleum ether (bp. 60~90 °C) and ethyl acetate as eluent. <sup>1</sup>H NMR (400 MHz) and <sup>13</sup>C NMR (100 MHz) spectra were recorded on a Bruker Avance (400 MHz) spectrometer, using CDCl<sub>3</sub> as the solvent and TMS as internal standard; chemical shifts were quoted in parts per million and *J* values were given in hertz. The following abbreviations were used to describe peak splitting patterns when appropriate: s = singlet, d = doublet, dd = double doublet, ddd = double doublet of doublets, t = triplet, dt = double triplet, q = quatrilplet, m = multiplet, br = broad. High resolution mass spectrometry (HRMS) was performed on a Waters Micromass. HPLC was carried out on an Agilent 1260 infinity instrument. Cyclobutanones<sup>1</sup> and alkenyl[2-(hydroxymethyl)phenyl] dimethylsilanes<sup>2</sup> were prepared according to the reported methods.

**Table S1:** Optimization of reaction conditions.<sup>a</sup>

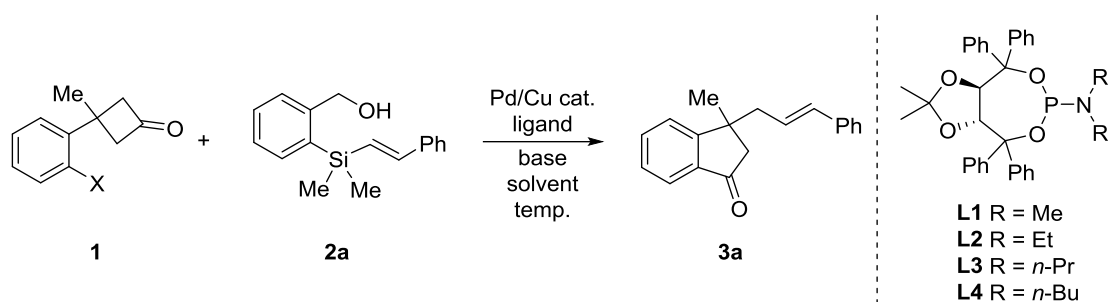

| Entry    | Catalyst                    | Ligand    | Base                               | Temp (°C) | Solvent     | X         | Yield     | er              |
|----------|-----------------------------|-----------|------------------------------------|-----------|-------------|-----------|-----------|-----------------|
| 1        | PdCl <sub>2</sub> /CuI      | <b>L1</b> | K <sub>2</sub> CO <sub>3</sub>     | 80        | THF         | Br        | 35        | 59.5:40.5       |
| 2        | PdCl <sub>2</sub> /CuI      | <b>L2</b> | K <sub>2</sub> CO <sub>3</sub>     | 80        | THF         | Br        | 48        | 94.5:5.5        |
| 3        | PdCl <sub>2</sub> /CuI      | <b>L3</b> | K <sub>2</sub> CO <sub>3</sub>     | 80        | THF         | Br        | 77        | 95:5            |
| <b>4</b> | <b>PdCl<sub>2</sub>/CuI</b> | <b>L4</b> | <b>K<sub>2</sub>CO<sub>3</sub></b> | <b>80</b> | <b>THF</b>  | <b>Br</b> | <b>92</b> | <b>96.5:3.5</b> |
| 5        | PdCl <sub>2</sub> /CuI      | <b>L4</b> | K <sub>2</sub> CO <sub>3</sub>     | 80        | THF         | I         | 82        | 96.5:3.5        |
| 6        | PdCl <sub>2</sub>           | <b>L4</b> | K <sub>2</sub> CO <sub>3</sub>     | 80        | THF         | Br        | 70        | 91.5:8.5        |
| 7        | CuI                         | <b>L4</b> | K <sub>2</sub> CO <sub>3</sub>     | 80        | THF         | Br        | trace     | -               |
| 8        | PdCl <sub>2</sub> /CuI      | <b>L4</b> | Na <sub>2</sub> CO <sub>3</sub>    | 80        | THF         | Br        | trace     | -               |
| 9        | PdCl <sub>2</sub> /CuI      | <b>L4</b> | Cs <sub>2</sub> CO <sub>3</sub>    | 80        | THF         | Br        | 14        | 95.5:4.5        |
| 10       | PdCl <sub>2</sub> /CuI      | <b>L4</b> | K <sub>3</sub> PO <sub>4</sub>     | 80        | THF         | Br        | 69        | 95.5:4.5        |
| 11       | PdCl <sub>2</sub> /CuI      | <b>L4</b> | K <sub>2</sub> CO <sub>3</sub>     | 80        | 1,4-dioxane | Br        | 80        | 93.5:6.5        |
| 12       | PdCl <sub>2</sub> /CuI      | <b>L4</b> | K <sub>2</sub> CO <sub>3</sub>     | 80        | toluene     | Br        | 62        | 95.5:4.5        |
| 13       | PdCl <sub>2</sub> /CuI      | <b>L4</b> | K <sub>2</sub> CO <sub>3</sub>     | 80        | DCE         | Br        | 80        | 96:4            |
| 14       | PdCl <sub>2</sub> /CuI      | <b>L4</b> | K <sub>2</sub> CO <sub>3</sub>     | 40        | THF         | Br        | 49        | 96:4            |
| 15       | PdCl <sub>2</sub> /CuI      | <b>L4</b> | K <sub>2</sub> CO <sub>3</sub>     | 60        | THF         | Br        | 80        | 95.5:4.5        |
| 16       | PdBr <sub>2</sub> /CuI      | <b>L4</b> | K <sub>2</sub> CO <sub>3</sub>     | 80        | THF         | Br        | 59        | 94.5:5.5        |
| 17       | Pd(OAc) <sub>2</sub> /CuI   | <b>L4</b> | K <sub>2</sub> CO <sub>3</sub>     | 80        | THF         | Br        | 32        | 94:6            |

<sup>a</sup> Reaction conditions: **1** (0.2 mmol), **2a** (0.24 mmol), Pd catalyst (0.01 mmol), CuI (0.02 mmol), ligand (0.04 mmol), base (0.5 mmol), solvent (2 mL) for 24 h, isolated yield.

### Typical procedure for the synthesis of **3a**.

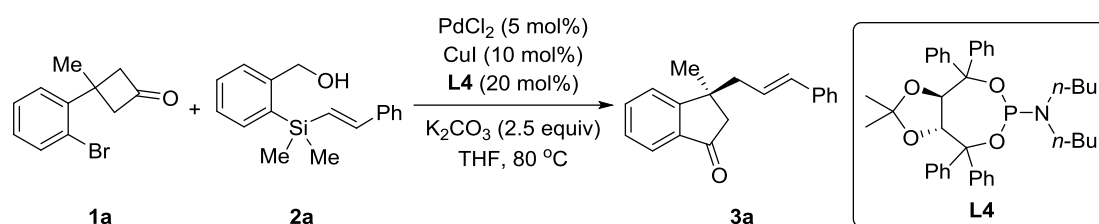

A vial was charged with PdCl<sub>2</sub> (1.8 mg, 0.01 mmol), CuI (3.8 mg, 0.02 mmol), **L4** (25.0 mg, 0.04 mmol), and K<sub>2</sub>CO<sub>3</sub> (69.1 mg, 0.5 mmol), and evacuated under high vacuum and backfilled with N<sub>2</sub>. THF (1 mL) was added via syringe and the mixture was stirred at room temperature for 20 min. A solution of **1a** (47.8 mg, 0.2 mmol) and **2a** (64.3 mg, 0.24 mmol) in THF (1 mL) was added via syringe and the mixture was stirred at 80 °C in an oil bath for 24 h, and then cooled to room temperature. The mixture was filtered over a plug of silica gel (washed with 50 mL EtOAc), and the filtrate was concentrated under reduced pressure and then purified by silica column to get the product **3a**.

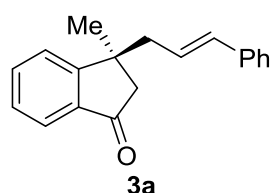

### 3-cinnamyl-3-methyl-2,3-dihydro-1H-inden-1-one

The mobile phase for flash chromatography: hexane/ethyl acetate = 60:1. Colorless oil (48.4 mg, 92%).  $[\alpha]_D^{25} = +49.3$  ( $c = 0.067$ , CHCl<sub>3</sub>). <sup>1</sup>H NMR (400 MHz, CDCl<sub>3</sub>):  $\delta$  7.72 (d,  $J = 7.6$  Hz, 1H), 7.66-7.62 (m, 1H), 7.53 (d,  $J = 7.6$  Hz, 1H), 7.41-7.37 (m, 1H), 7.28-7.17 (m, 5H), 6.39 (d,  $J = 15.6$  Hz, 1H), 5.95 (dt,  $J = 15.6, 7.6$  Hz, 1H), 2.79 (d,  $J = 18.8$  Hz, 1H), 2.62-2.54 (m, 2H), 2.47 (d,  $J = 18.8$  Hz, 1H), 1.48 (s, 3H). <sup>13</sup>C NMR (100 MHz, CDCl<sub>3</sub>):  $\delta$  205.6, 162.2, 137.3, 136.3, 135.0, 134.1, 128.6, 127.8, 127.5, 126.3, 125.7, 124.1, 123.6, 50.0, 45.9, 42.5, 28.2. HRMS (ESI-TOF)  $m/z$ : [M + Na]<sup>+</sup> Calcd for C<sub>19</sub>H<sub>18</sub>NaO, 285.1250; found 285.1241. Enantiomeric excess was determined by HPLC with double Chiralpak OD-H column (hexane:2-propanol = 95:5, 1.0 mL/min, 254 nm, 96.5:3.5 *er*); major enantiomer  $t_r = 21.1$  min, minor enantiomer  $t_r = 22.9$  min.

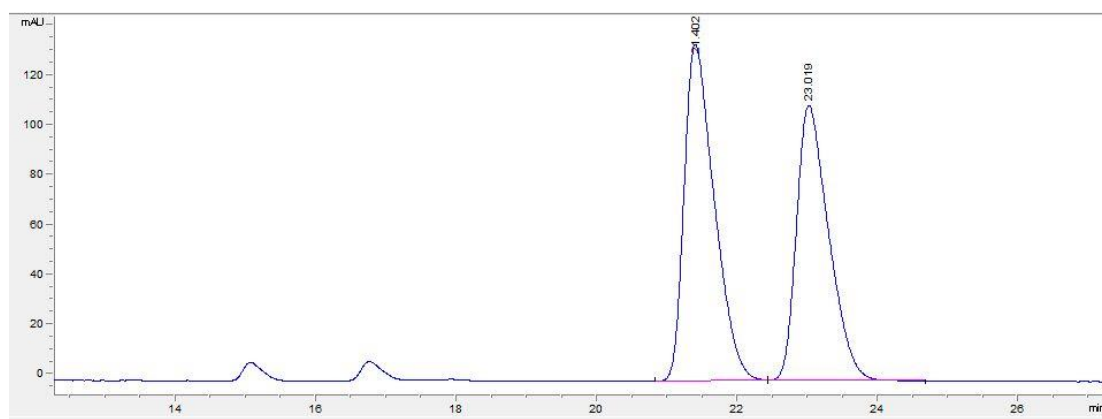

|   | Time/min | Area   | Height | Area%  |
|---|----------|--------|--------|--------|
| 1 | 21.402   | 3929.6 | 135.1  | 51.351 |
| 2 | 23.019   | 4183.9 | 120.3  | 48.649 |

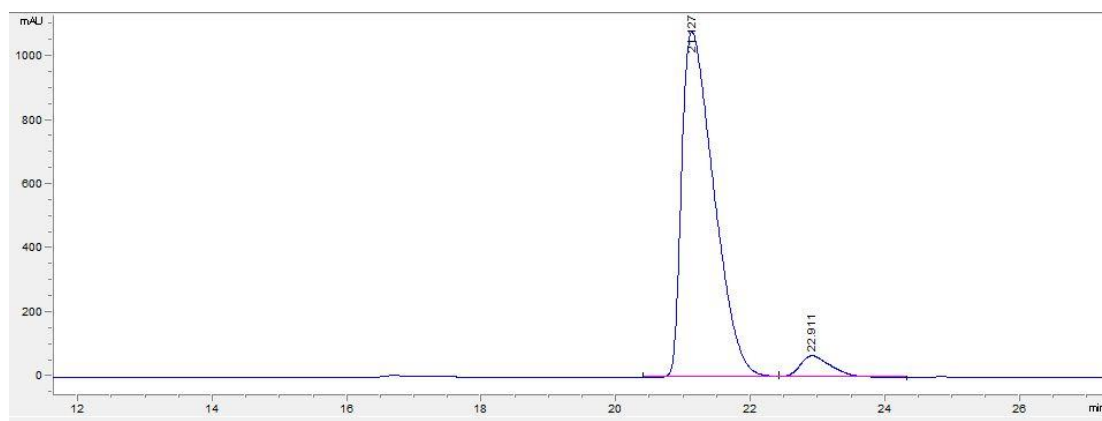

|   | Time/min | Area    | Height | Area%  |
|---|----------|---------|--------|--------|
| 1 | 21.124   | 67711.9 | 1793.4 | 96.423 |
| 2 | 22.91    | 4721.3  | 142.8  | 3.577  |

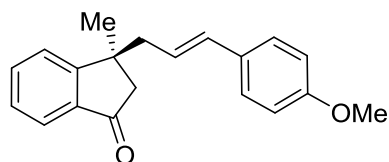

**3b**

**(E)-3-(3-(4-methoxyphenyl)allyl)-3-methyl-2,3-dihydro-1H-inden-1-one**

The mobile phase for flash chromatography: hexane/ethyl acetate = 20:1. Colorless oil. (31.0 mg, 53%).  $[\alpha]_D^{25} = +29.2$  (c = 0.34, CHCl<sub>3</sub>). <sup>1</sup>H NMR (400 MHz, CDCl<sub>3</sub>) δ 7.71 (d, *J* = 7.6 Hz, 1H), 7.63 (t, *J* = 7.6 Hz, 1H), 7.52 (d, *J* = 7.6 Hz, 1H), 7.39 (t, *J* = 8.4 Hz, 1H), 7.17 (d, *J* = 8.4 Hz, 2H), 6.80 (d, *J* = 8.4 Hz, 2H), 6.32 (d, *J* = 15.6 Hz, 1H),

5.80 (td,  $J = 15.6, 7.6$  Hz, 1H), 3.78 (s, 3H), 2.79 (d,  $J = 18.8$  Hz, 1H), 2.55 (d,  $J = 6.8$  Hz, 2H), 2.46 (d,  $J = 18.8$  Hz, 1H), 1.47 (s, 3H).  $^{13}\text{C}$  NMR (100 MHz,  $\text{CDCl}_3$ )  $\delta$  205.8, 162.3, 159.1, 136.2, 135.0, 133.4, 130.1, 127.7, 127.4, 124.1, 123.5, 123.4, 114.0, 55.4, 50.0, 45.9, 42.6, 28.1. HRMS (ESI-TOF)  $m/z$ :  $[\text{M} + \text{Na}]^+$  Calcd for  $\text{C}_{20}\text{H}_{20}\text{NaO}_2$ , 315.1356; found 315.1349. Enantiomeric excess was determined by HPLC with a Chiralpak OX-H column (hexanes: 2-propanol = 90:10, 0.8 mL/min, 210 nm, 95:5 er); major enantiomer  $t_r = 13.7$  min, minor enantiomer  $t_r = 15.0$  min.

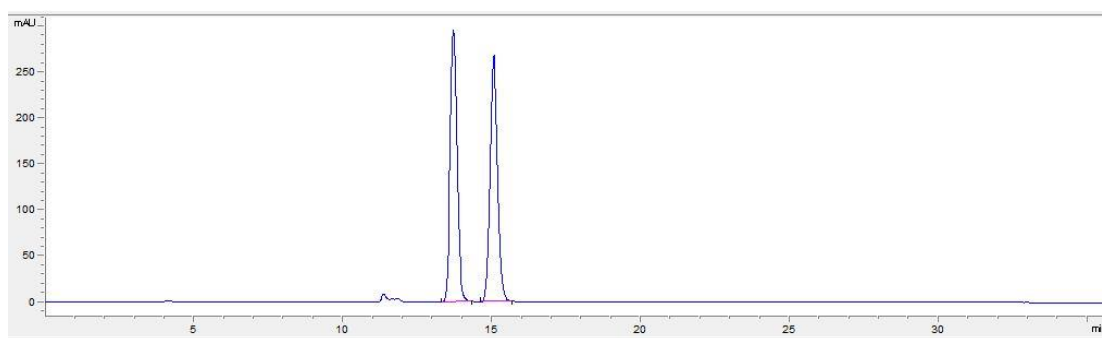

|   | Time/min | Area   | Height | Area% |
|---|----------|--------|--------|-------|
| 1 | 13.702   | 4720.9 | 295.3  | 50.0  |
| 2 | 15.053   | 4706.4 | 267.8  | 50.0  |

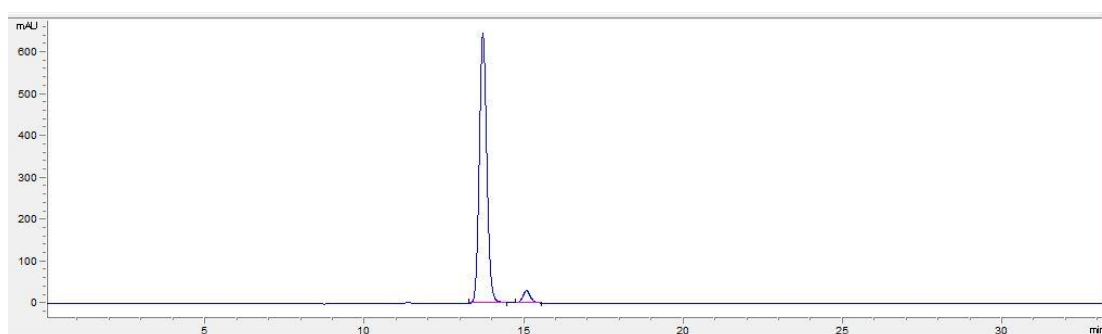

|   | Time/min | Area    | Height | Area% |
|---|----------|---------|--------|-------|
| 1 | 13.711   | 10346.3 | 644    | 95.0  |
| 2 | 15.07    | 529.4   | 30.5   | 5.0   |

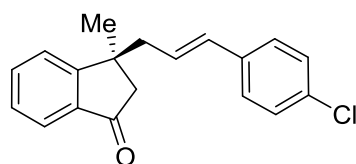

**3c**

**(E)-3-(3-(4-chlorophenyl)allyl)-3-methyl-2,3-dihydro-1H-inden-1-one**

The mobile phase for flash chromatography: hexane/ethyl acetate = 60:1. Colorless oil. (38.0 mg, 65%).  $[\alpha]_D^{25} = +27.6$  ( $c = 1.02$ ,  $\text{CHCl}_3$ ).  $^1\text{H NMR}$  (400 MHz,  $\text{CDCl}_3$ )  $\delta$  7.71 (d,  $J = 7.6$  Hz, 1H), 7.64 (t,  $J = 7.6$  Hz, 1H), 7.51 (d,  $J = 7.6$  Hz, 1H), 7.39 (t,  $J = 7.6$  Hz, 1H), 7.21 (d,  $J = 8.4$  Hz, 2H), 7.14 (d,  $J = 8.4$  Hz, 2H), 6.32 (d,  $J = 15.6$  Hz, 1H), 5.90 (td,  $J = 15.6, 7.6$  Hz, 1H), 2.77 (d,  $J = 18.8$  Hz, 1H), 2.57 (d,  $J = 7.6$  Hz, 2H), 2.47 (d,  $J = 18.8$  Hz, 1H), 1.48 (s, 3H).  $^{13}\text{C NMR}$  (100 MHz,  $\text{CDCl}_3$ )  $\delta$  205.5, 162.0, 136.2, 135.6, 135.1, 133.0, 132.8, 128.7, 127.8, 127.4, 126.3, 124.0, 123.6, 50.0, 45.9, 42.5, 28.1. HRMS (ESI-TOF)  $m/z$ :  $[\text{M} + \text{Na}]^+$  Calcd for  $\text{C}_{19}\text{H}_{17}\text{ClNaO}$ , 319.0860; found 319.0851. Enantiomeric excess was determined by HPLC with double Chiralpak OX-H column(hexanes:2-propanol = 95:5, 0.8 mL/min, 210 nm, 95.5:4.5 er); major enantiomer  $t_r = 21.9$  min, minor enantiomer  $t_r = 24.5$  min.

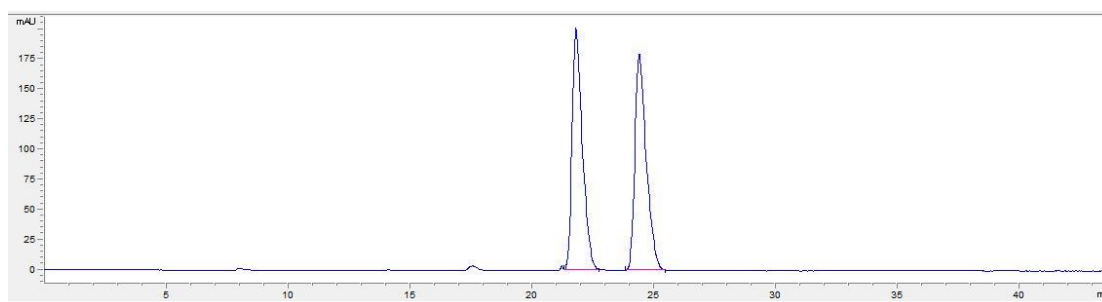

|   | Time/min | Area   | Height | Area% |
|---|----------|--------|--------|-------|
| 1 | 21.793   | 5835.9 | 201.1  | 50.0  |
| 2 | 24.387   | 5848.9 | 180.1  | 50.0  |

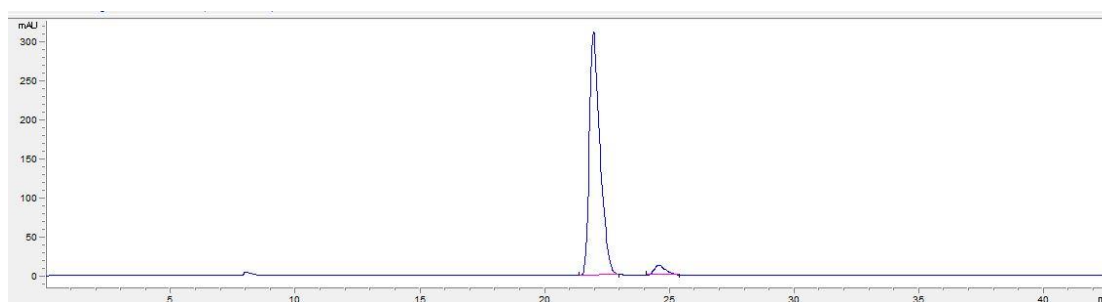

|   | Time/min | Area   | Height | Area% |
|---|----------|--------|--------|-------|
| 1 | 21.936   | 9164.6 | 311.2  | 95.5  |
| 2 | 24.549   | 413.1  | 12.8   | 4.5   |

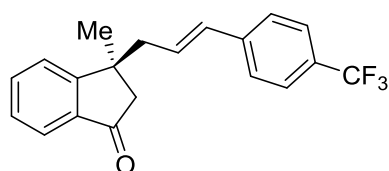

**3d**

**(*S,E*)-3-methyl-3-(3-(4-(trifluoromethyl)phenyl)allyl)-2,3-dihydro-1*H*-inden-1-one**

The mobile phase for flash chromatography: hexane/ethyl acetate = 50:1. Yellow oil (50 mg, 75%).  $[\alpha]_D^{25} = +12.3$  (c = 2.83, CHCl<sub>3</sub>). <sup>1</sup>H NMR (400 MHz, CDCl<sub>3</sub>) δ 7.72 (d, *J* = 7.6 Hz, 1H), 7.65 (t, *J* = 7.6 Hz, 1H), 7.57-7.47 (m, 3H), 7.40 (t, *J* = 7.6 Hz, 1H), 7.31 (d, *J* = 8.4 Hz, 2H), 6.41 (d, *J* = 16.0 Hz, 1H), 6.02 (dt, *J* = 16.0, 7.6 Hz, 1H), 2.77 (d, *J* = 18.8 Hz, 1H), 2.61 (d, *J* = 7.6 Hz, 2H), 2.49 (d, *J* = 18.8 Hz, 1H), 1.50 (s, 3H). <sup>13</sup>C NMR (100 MHz, CDCl<sub>3</sub>) δ 205.4, 161.8, 140.6, 136.2, 135.1, 132.8, 129.3 (q, *J* = 32.2 Hz), 128.5, 127.9, 126.4, 125.6 (q, *J* = 2.9 Hz), 124.3 (q, *J* = 250.5 Hz), 124.0, 123.6, 50.0, 45.9, 42.5, 28.2. HRMS (ESI-TOF) *m/z*: [M + H]<sup>+</sup> Calcd for C<sub>20</sub>H<sub>18</sub>F<sub>3</sub>O, 331.1304; found 331.1328. Enantiomeric excess was determined by HPLC with a chiralcel OD column (hexanes: 2-propanol = 95:5, 0.8 mL/min, 230 nm, 94.5:5.5 er); major enantiomer *tr* = 9.8 min, minor enantiomer *tr* = 11.9 min.

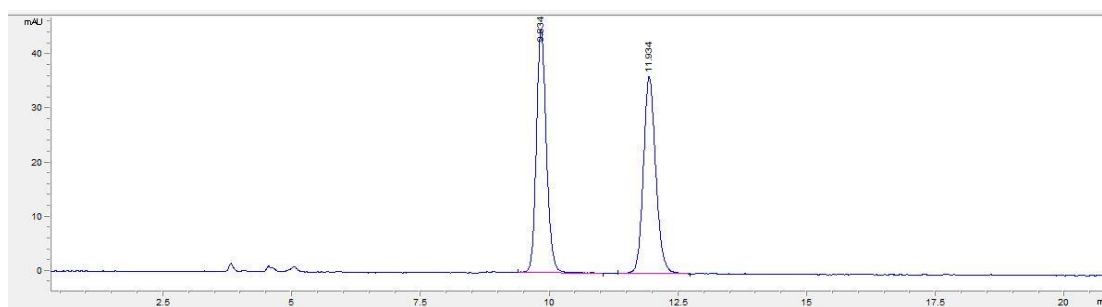

|   | Time/min | Area  | Height | Area% |
|---|----------|-------|--------|-------|
| 1 | 9.834    | 609.6 | 44.9   | 49.9  |
| 2 | 11.934   | 612.9 | 36.5   | 50.1  |

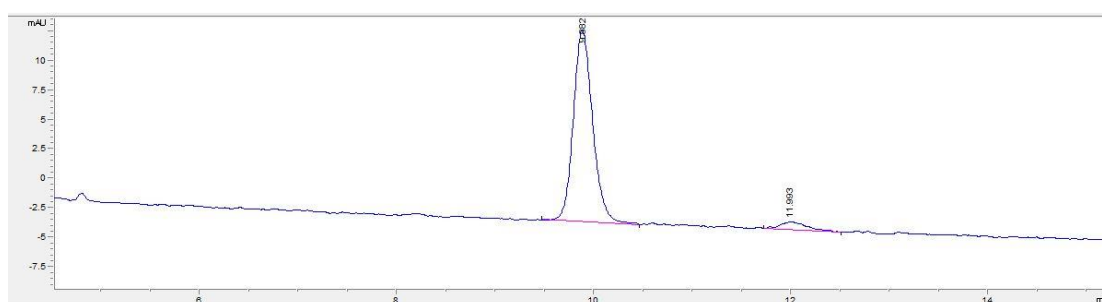



|   | Time/min | Area  | Height | Area% |
|---|----------|-------|--------|-------|
| 1 | 9.882    | 222.2 | 16.2   | 94.5  |
| 2 | 11.993   | 13.6  | 6.8E-1 | 5.5   |

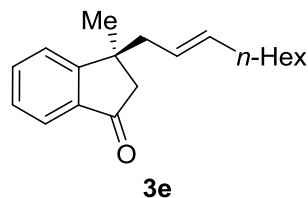

**(E)-3-methyl-3-(non-2-en-1-yl)-2,3-dihydro-1H-inden-1-one**

The mobile phase for flash chromatography: hexane/ethyl acetate = 60:1. Colorless oil (41.3 mg, 77%).  $[\alpha]_{\text{D}}^{25} = -9.1$  ( $c = 1.01$ ,  $\text{CHCl}_3$ ).  $^1\text{H NMR}$  (500 MHz,  $\text{CDCl}_3$ )  $\delta$  7.68 (d,  $J = 7.5$  Hz, 1H), 7.60 (t,  $J = 7.5$  Hz, 1H), 7.46 (d,  $J = 7.5$  Hz, 1H), 7.36 (t,  $J = 7.5$  Hz, 1H), 5.43-5.36 (m, 1H), 5.14-5.07 (m, 1H), 2.71 (d,  $J = 15.2$  Hz, 1H), 2.39 (d,  $J = 15.2$  Hz, 1H), 2.35 (d,  $J = 6.0$  Hz, 2H), 1.93-1.87 (m, 2H), 1.40 (s, 3H), 1.27-1.16 (m, 8H), 0.86 (t,  $J = 7.0$  Hz, 3H).  $^{13}\text{C NMR}$  (100 MHz,  $\text{CDCl}_3$ )  $\delta$  206.0, 162.5, 136.3, 135.4, 134.9, 127.5, 125.1, 124.0, 123.4, 49.8, 45.5, 42.3, 32.6, 31.8, 29.4, 28.8, 28.2, 22.7, 14.2. HRMS (ESI-TOF)  $m/z$ :  $[\text{M} + \text{Na}]^+$  Calcd for  $\text{C}_{19}\text{H}_{26}\text{NaO}$ , 293.1876; found 293.1869. Enantiomeric excess was determined by HPLC with a Chiralpak OX-H column (hexane: 2-propanol = 98:2, 0.5 mL/min, 254 nm, 94:6 er); major enantiomer  $t_r = 12.3$  min, minor enantiomer  $t_r = 11.8$  min.

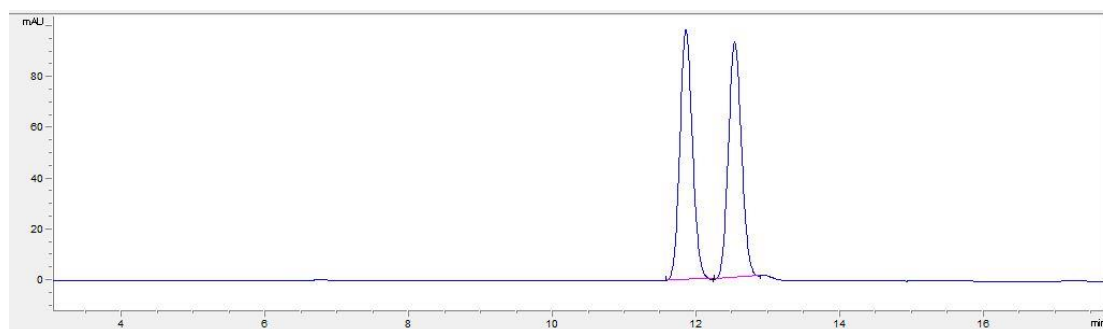

|   | Time/min | Area   | Height | Area%  |
|---|----------|--------|--------|--------|
| 1 | 11.851   | 1206.9 | 98.7   | 50.499 |
| 2 | 12.531   | 1183   | 93.1   | 49.501 |

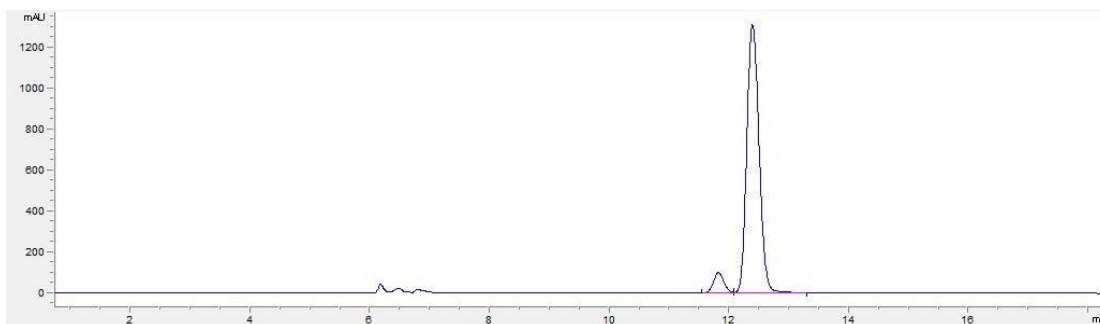

|   | Time/min | Area    | Height | Area%  |
|---|----------|---------|--------|--------|
| 1 | 11.819   | 1223    | 99.8   | 6.116  |
| 2 | 12.389   | 18773.5 | 1308.3 | 93.884 |

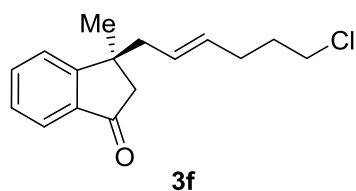

**(E)-3-(6-chlorohex-2-en-1-yl)-3-methyl-2,3-dihydro-1H-inden-1-one**

The mobile phase for flash chromatography: hexane/ethyl acetate = 60:1. Colorless oil (43.8 mg, 84%).  $[\alpha]_D^{25} = +19.3$  ( $c = 0.34$ ,  $\text{CHCl}_3$ ).  $^1\text{H NMR}$  (400 MHz,  $\text{CDCl}_3$ )  $\delta$  7.69 (d,  $J = 7.6$  Hz, 1H), 7.62 (t,  $J = 7.6$  Hz, 1H), 7.46 (d,  $J = 7.6$  Hz, 1H), 7.37 (d,  $J = 7.6$  Hz, 1H), 5.35 (dt,  $J = 15.2, 6.8$  Hz, 1H), 5.17 (dt,  $J = 15.2, 6.8$  Hz, 1H), 3.39 (t,  $J = 6.4$  Hz, 1H), 2.69 (d,  $J = 18.8$  Hz, 1H), 2.44-2.35 (m, 3H), 2.09-2.03 (m, 2H), 1.74-1.66 (m, 2H), 1.42 (s, 3H).  $^{13}\text{C NMR}$  (100 MHz,  $\text{CDCl}_3$ )  $\delta$  205.9, 162.3, 136.3, 135.0, 133.1, 127.7, 126.9, 124.0, 123.4, 49.8, 45.5, 44.3, 42.2, 32.1, 29.7, 28.2. HRMS (ESI-TOF)  $m/z$ :  $[\text{M} + \text{Na}]^+$  Calcd for  $\text{C}_{16}\text{H}_{19}\text{ClNaO}$ , 285.1017; found 285.1008. Enantiomeric excess was determined by HPLC with double Chiralpak OX-H column (hexane:2-propanol 95:5, 0.8 mL/min, 290 nm, 96:4 er); major enantiomer  $t_r = 21.0$  min, minor enantiomer  $t_r = 22.0$  min.

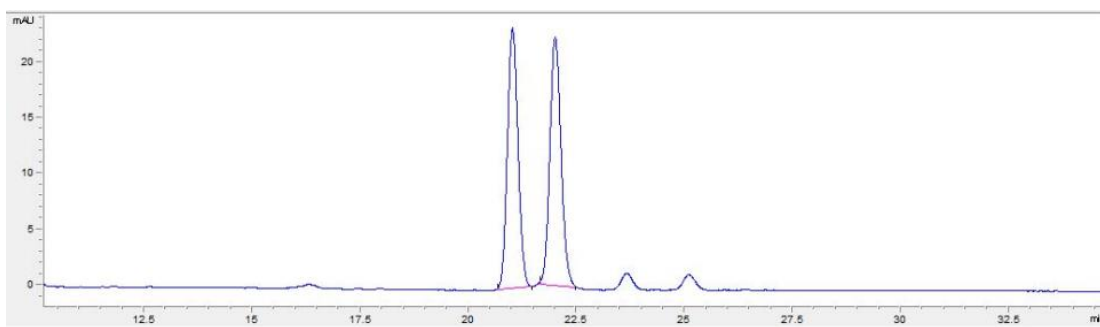

|   | Time/min | Area  | Height | Area% |
|---|----------|-------|--------|-------|
| 1 | 21.024   | 395.5 | 23.3   | 49.5  |
| 2 | 22.011   | 402.9 | 22.3   | 50.5  |

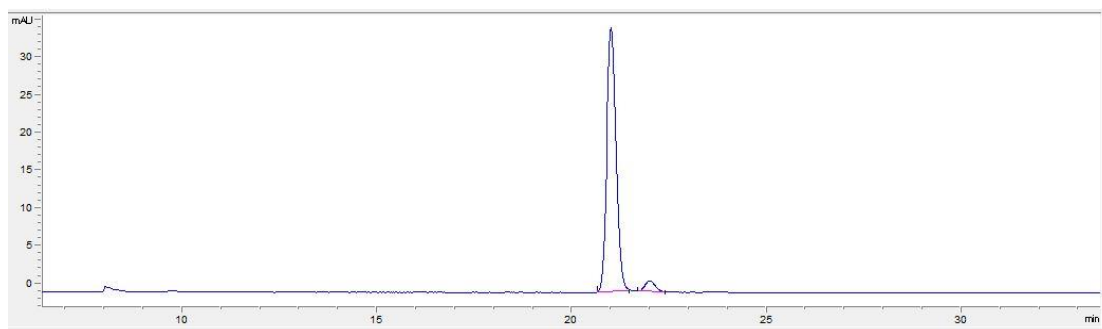

|   | Time/min | Area | Height | Area% |
|---|----------|------|--------|-------|
| 1 | 21.009   | 602  | 34.9   | 96.0  |
| 2 | 21.988   | 24   | 1.4    | 4.0   |

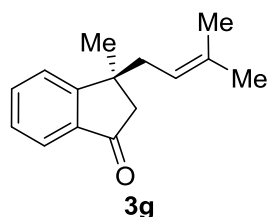

### 3-methyl-3-(3-methylbut-2-en-1-yl)-2,3-dihydro-1H-inden-1-one

The mobile phase for flash chromatography: hexane/ethyl acetate = 60:1. Colorless oil. (22.0 mg, 51%).  $[\alpha]_D^{25} = +39.2$  ( $c = 0.34$ ,  $\text{CHCl}_3$ ).  $^1\text{H NMR}$  (400 MHz,  $\text{CDCl}_3$ )  $\delta$  7.79 (d,  $J = 7.6$  Hz, 1H), 7.60 (t,  $J = 7.6$  Hz, 1H), 7.48 (d,  $J = 7.6$  Hz, 1H), 7.36 (t,  $J = 7.6$  Hz, 1H), 4.91-4.84 (m, 1H), 2.65 (d,  $J = 18.4$  Hz, 1H), 2.47-2.28 (m, 3H), 1.61 (s, 3H), 1.52 (s, 3H), 1.42 (s, 3H).  $^{13}\text{C NMR}$  (100 MHz,  $\text{CDCl}_3$ )  $\delta$  206.3, 162.7, 136.2, 135.2, 134.9, 127.5, 124.0, 123.4, 119.8, 50.1, 42.7, 40.5, 28.2, 26.0, 18.0. HRMS (ESI-TOF)  $m/z$ :  $[\text{M} + \text{Na}]^+$  Calcd for  $\text{C}_{15}\text{H}_{18}\text{NaO}$ , 237.1250; found 237.1237. Enantiomeric excess was determined by HPLC with double Chiralpak OX-H column (hexanes:2-propanol = 95:5, 1 mL/min, 210 nm, 94.5:5.5 er); major enantiomer  $t_r = 34.8$  min, minor enantiomer  $t_r = 33.1$  min.

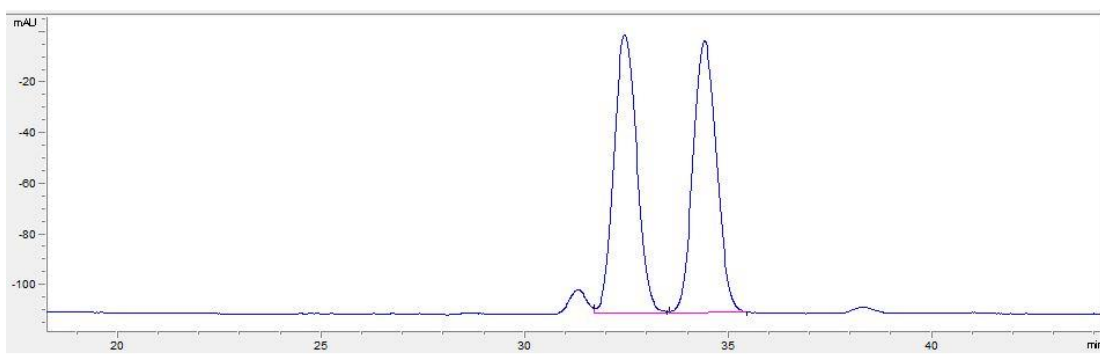

|   | Time/min | Area   | Height | Area% |
|---|----------|--------|--------|-------|
| 1 | 32.447   | 4317.5 | 110.2  | 50.0  |
| 2 | 34.403   | 4316.3 | 107.4  | 50.0  |

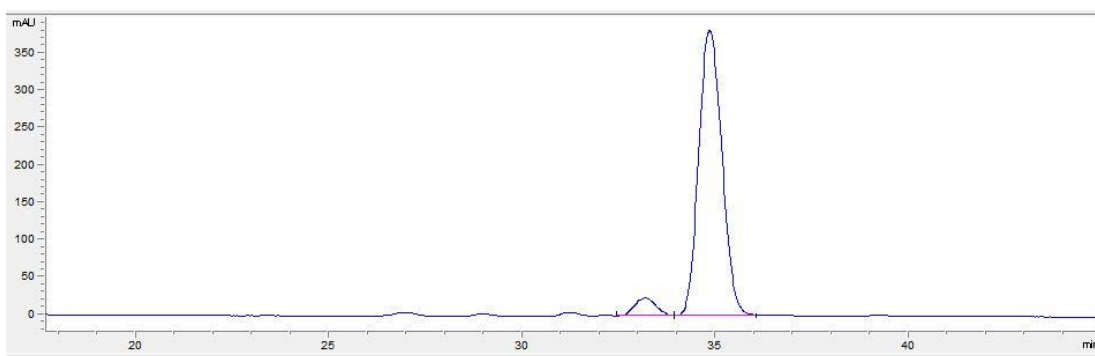

|   | Time/min | Area    | Height | Area% |
|---|----------|---------|--------|-------|
| 1 | 33.156   | 907.5   | 23.7   | 5.5   |
| 2 | 34.841   | 15902.5 | 381.2  | 94.5  |

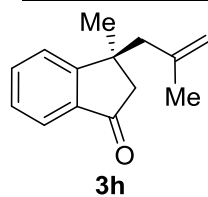

### 3-methyl-3-(2-methylallyl)-2,3-dihydro-1H-inden-1-one

The mobile phase for flash chromatography: hexane/ethyl acetate = 60:1. Colorless oil. (31.9 mg, 80%).  $[\alpha]_D^{25} = +20.8$  ( $c = 0.99$ ,  $\text{CHCl}_3$ ).  $^1\text{H NMR}$  (400 MHz,  $\text{CDCl}_3$ )  $\delta$  7.69 (d,  $J = 8.0$  Hz, 1H), 7.60 (t,  $J = 8.0$  Hz, 1H), 7.53 (d,  $J = 8.0$  Hz, 1H), 7.34 (t,  $J = 8.0$  Hz, 1H), 4.80 (s, 1H), 4.63 (s, 1H), 2.83 (d,  $J = 18.8$  Hz, 1H), 2.49-2.39 (m, 3H), 1.44 (s, 3H), 1.33 (s, 3H).  $^{13}\text{C NMR}$  (100 MHz,  $\text{CDCl}_3$ )  $\delta$  206.1, 162.7, 142.4, 136.1, 134.8, 127.7, 124.2, 123.5, 115.9, 50.0, 42.0, 29.5, 24.2. HRMS (ESI-TOF)  $m/z$ :  $[\text{M} + \text{Na}]^+$  Calcd for  $\text{C}_{14}\text{H}_{16}\text{NaO}$ , 223.1093; found 223.1086. Enantiomeric excess was determined

by HPLC with double Chiralpak OX-H column (hexanes: 2-propanol = 90:10, 0.8 mL/min, 254 nm, 96.5:3.5 er); major enantiomer  $t_r$  = 34.0 min, minor enantiomer  $t_r$  = 35.0 min.

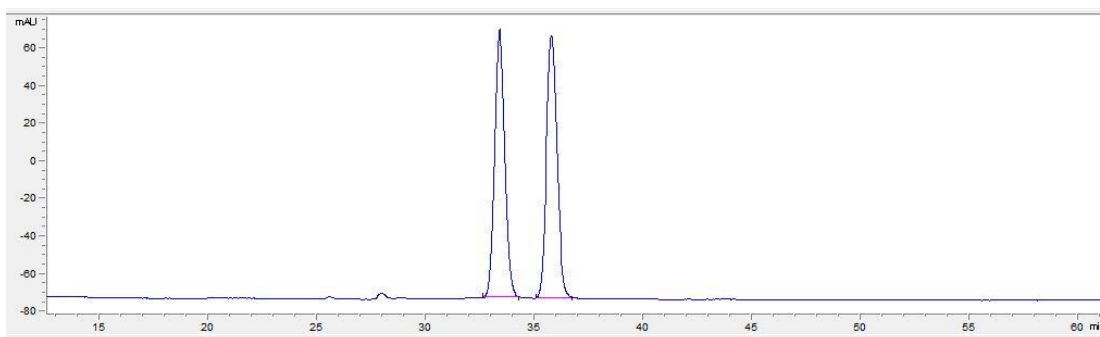

|   | Time/min | Area   | Height | Area% |
|---|----------|--------|--------|-------|
| 1 | 33.378   | 4666.9 | 142.6  | 50.0  |
| 2 | 35.768   | 4709.9 | 139.7  | 50.0  |

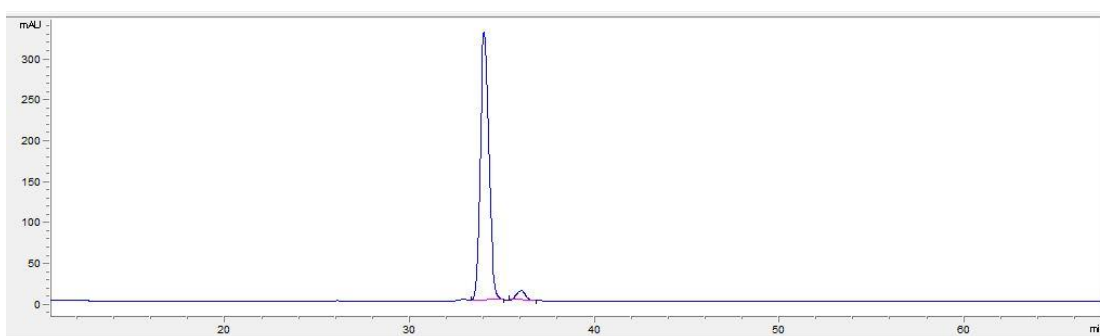

|   | Time/min | Area    | Height | Area% |
|---|----------|---------|--------|-------|
| 1 | 34.013   | 10657.4 | 327    | 96.5  |
| 2 | 35.994   | 396.1   | 12     | 3.5   |

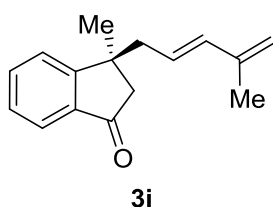

**(E)-3-methyl-3-(4-methylpenta-2,4-dien-1-yl)-2,3-dihydro-1H-inden-1-one**

The mobile phase for flash chromatography: hexane/ethyl acetate = 60:1. Colorless oil (37.9 mg, 84%).  $[\alpha]_D^{25} = +39.4$  ( $c = 0.35$ ,  $\text{CHCl}_3$ ).  $^1\text{H NMR}$  (500 MHz,  $\text{CDCl}_3$ )  $\delta$  7.70 (d,  $J = 7.5$  Hz, 1H), 7.62 (t,  $J = 7.5$  Hz, 1H), 7.48 (d,  $J = 7.5$  Hz, 1H), 7.37 (t,  $J = 7.5$

Hz, 1H), 6.11 (d,  $J = 15.5$  Hz, 1H), 5.38-5.32 (m, 1H), 4.86 (d,  $J = 10.5$  Hz, 2H), 2.72 (d,  $J = 18.5$  Hz, 1H), 2.47 (d,  $J = 7.0$  Hz, 2H), 2.42 (d,  $J = 18.5$  Hz, 1H), 1.69 (s, 3H), 1.44 (s, 3H).  $^{13}\text{C}$  NMR (100 MHz,  $\text{CDCl}_3$ )  $\delta$  205.8, 162.3, 141.7, 137.0, 136.3, 135.0, 127.7, 125.3, 124.0, 123.5, 115.8, 50.0, 45.7, 42.5, 28.1, 18.7. HRMS (ESI-TOF)  $m/z$ :  $[\text{M} + \text{Na}]^+$  Calcd for  $\text{C}_{16}\text{H}_{18}\text{NaO}$ , 249.1250; found 249.1265. Enantiomeric excess was determined by HPLC with a Chiralpak OX-H column (hexane:2-propanol 90:10, 0.8 mL/min, 254 nm, 94.5:5.5 er); major enantiomer  $t_r = 24.8$  min, minor enantiomer  $t_r = 23.5$  min.

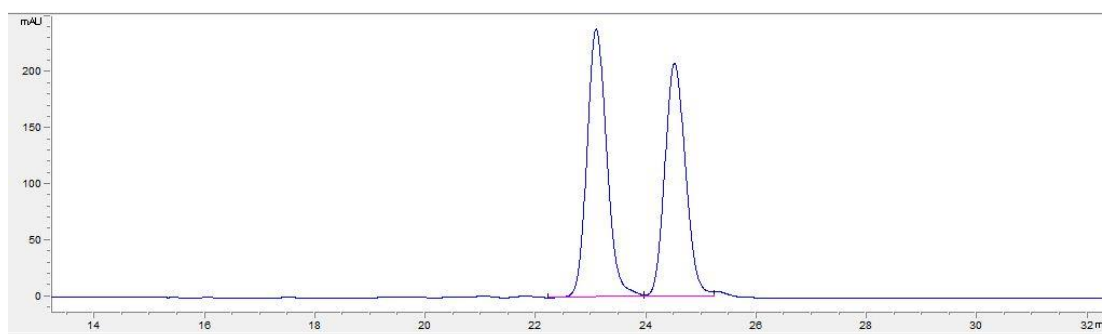

|   | Time/min | Area   | Height | Area%  |
|---|----------|--------|--------|--------|
| 1 | 23.094   | 6014.1 | 239.2  | 52.349 |
| 2 | 24.514   | 5474.4 | 208.3  | 47.651 |

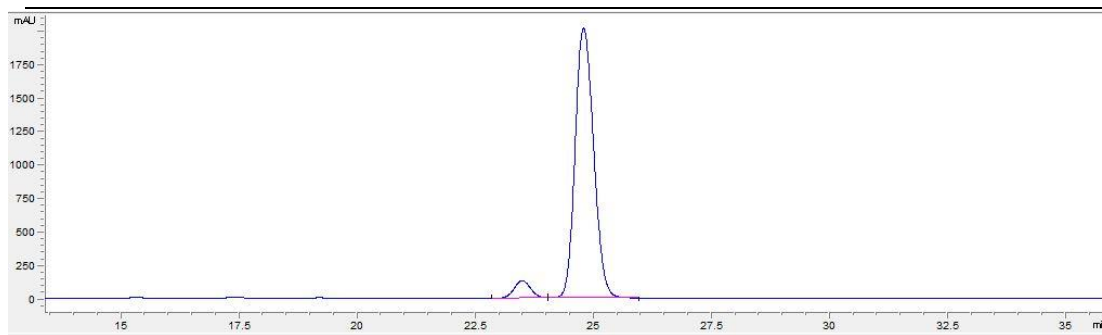

|   | Time/min | Area    | Height | Area%  |
|---|----------|---------|--------|--------|
| 1 | 23.488   | 3287.5  | 131.5  | 5.625  |
| 2 | 24.788   | 55155.1 | 2015.3 | 94.375 |

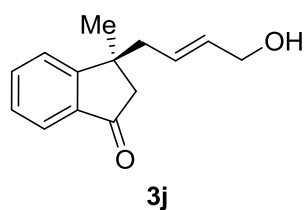

**(E)-3-(4-hydroxybut-2-en-1-yl)-3-methyl-2,3-dihydro-1H-inden-1-one**

The mobile phase for flash chromatography: hexane/ethyl acetate = 20:1 to 5:1. Colorless oil. (34.0 mg, 79%).  $[\alpha]_D^{25} = +24.4$  (c = 0.31, CHCl<sub>3</sub>). <sup>1</sup>H NMR (400 MHz, CDCl<sub>3</sub>) δ 7.69 (d, *J* = 7.6 Hz, 1H), 7.62 (t, *J* = 7.6 Hz, 1H), 7.48 (d, *J* = 7.6 Hz, 1H), 7.37 (t, *J* = 7.6 Hz, 1H), 5.64 (td, *J* = 15.2, 5.6 Hz, 1H), 5.36 (td, *J* = 15.2, 7.2 Hz, 1H), 3.99 (d, *J* = 5.6 Hz, 2H), 2.70 (d, *J* = 18.8 Hz, 1H), 2.45-2.39 (m, 3H), 1.43 (s, 3H). <sup>13</sup>C NMR (100 MHz, CDCl<sub>3</sub>) δ 206.0, 162.1, 136.3, 135.1, 133.7, 127.8, 127.5, 123.9, 123.5, 63.3, 49.8, 45.1, 42.1, 28.2. HRMS (ESI-TOF) *m/z*: [M + Na]<sup>+</sup> Calcd for C<sub>14</sub>H<sub>16</sub>NaO<sub>2</sub>, 239.1043; found 239.1037. Enantiomeric excess was determined by HPLC with Chiralpak OX-H column (hexanes:2-propanol = 80:20, 0.9 mL/min, 210 nm, 95:5 er); major enantiomer *tr* = 11.4 min, minor enantiomer *tr* = 12.3 min.

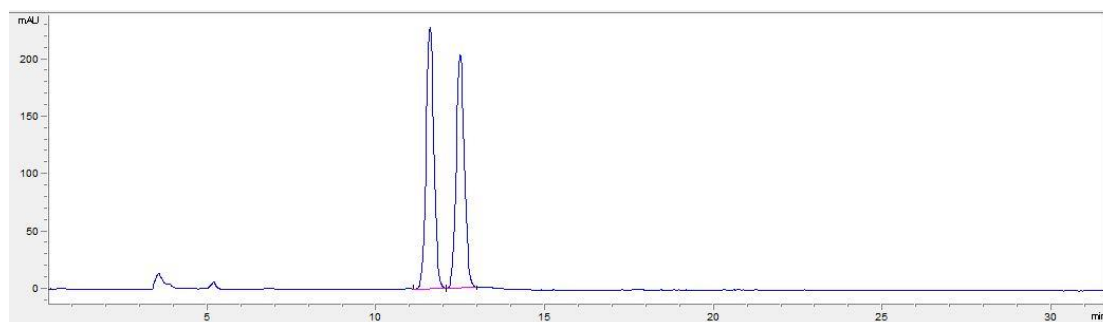

|   | Time/min | Area   | Height | Area% |
|---|----------|--------|--------|-------|
| 1 | 11.584   | 3677.4 | 227.5  | 51.4  |
| 2 | 12.479   | 3475.6 | 202.7  | 48.6  |

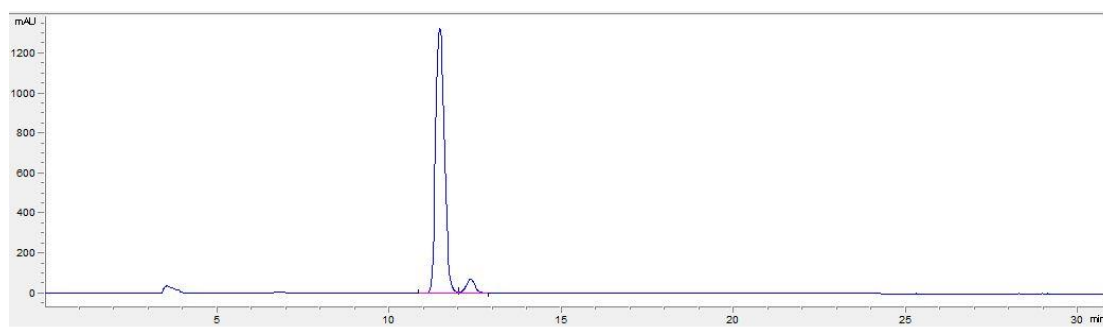

|   | Time/min | Area    | Height | Area% |
|---|----------|---------|--------|-------|
| 1 | 11.452   | 23532.2 | 1321.8 | 95.0  |
| 2 | 12.348   | 1291.2  | 72.4   | 5.0   |

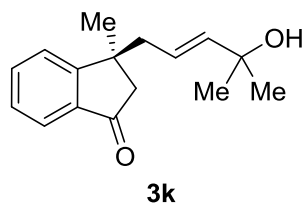

**(E)-3-(4-hydroxy-4-methylpent-2-en-1-yl)-3-methyl-2,3-dihydro-1H-inden-1-one**

The mobile phase for flash chromatography: hexane/ethyl acetate = 5:1. Colorless oil (30.5 mg, 63%).  $[\alpha]_D^{25} = +106.6$  (c = 1.02, CHCl<sub>3</sub>). <sup>1</sup>H NMR (500 MHz, CDCl<sub>3</sub>) δ 7.69 (d, *J* = 7.6 Hz, 1H), 7.64-7.59 (m, 1H), 7.47 (d, *J* = 8.0 Hz, 1H), 7.40-7.34 (m, 1H), 5.55 (dt, *J* = 15.2, 1.2 Hz, 1H), 5.29 (dt, *J* = 15.2, 7.2 Hz, 1H), 2.69 (d, *J* = 18.8 Hz, 1H), 2.42 (d, *J* = 18.8 Hz, 1H), 2.38 (dd, *J* = 7.2, 1.2 Hz, 2H), 1.44 (s, 3H), 1.18 (s, 3H), 1.17 (s, 3H). <sup>13</sup>C NMR (100 MHz, CDCl<sub>3</sub>) δ 205.9, 162.0, 142.8, 136.4, 135.0, 127.7, 124.0, 123.4, 122.0, 70.6, 50.0, 45.2, 42.4, 29.8, 29.7, 27.9. HRMS (ESI-TOF) *m/z*: [M + Na]<sup>+</sup> Calcd for C<sub>16</sub>H<sub>20</sub>NaO<sub>2</sub>, 267.1356; found 267.1339. Enantiomeric excess was determined by HPLC with double Chiralpak OX-H column (hexane:2-propanol 80:20, 0.5 mL/min, 254 nm, 96:4 er); major enantiomer *tr* = 28.1 min, minor enantiomer *tr* = 27.0 min.

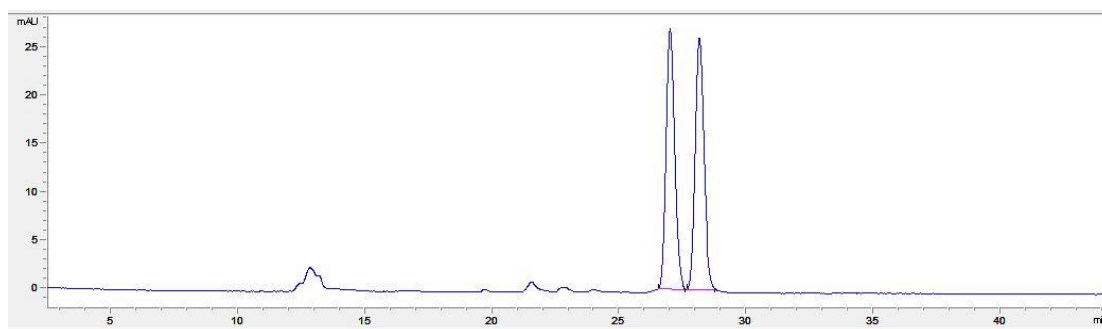

|   | Time/min | Area  | Height | Area% |
|---|----------|-------|--------|-------|
| 1 | 26.997   | 616.7 | 27     | 49.5  |
| 2 | 28.144   | 625.4 | 26.1   | 50.5  |



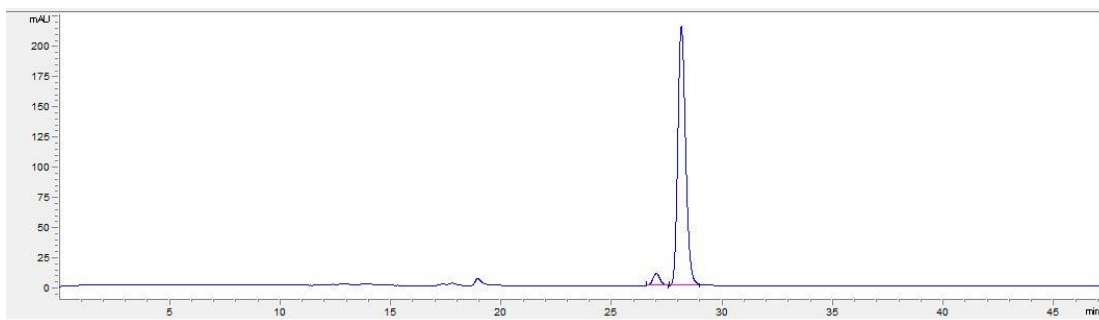

|   | Time/min | Area   | Height | Area% |
|---|----------|--------|--------|-------|
| 1 | 26.995   | 222.2  | 9.9    | 4.0   |
| 2 | 28.12    | 5219.1 | 214.2  | 96.0  |

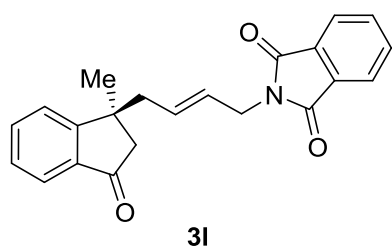

**(*E*)-2-(4-(1-methyl-3-oxo-2,3-dihydro-1*H*-inden-1-yl)but-2-en-1-yl)isoindoline-1,3-dione**

The mobile phase for flash chromatography: hexane/ethyl acetate = 20:1. Colorless oil. (40.8 mg, 59%).  $[\alpha]_D^{25} = +18.3$  ( $c = 0.31$ ,  $\text{CHCl}_3$ ).  $^1\text{H NMR}$  (400 MHz,  $\text{CDCl}_3$ )  $\delta$  7.85-7.81 (m, 2H), 7.74-7.68 (m, 2H), 7.63 (d,  $J = 7.6$  Hz, 1H), 7.54 (t,  $J = 7.6$  Hz, 1H), 7.43 (d,  $J = 7.6$  Hz, 1H), 7.29 (t,  $J = 7.6$  Hz, 1H), 5.53-5.49 (m, 2H), 4.21-4.09 (m, 2H), 2.65 (d,  $J = 18.8$  Hz, 1H), 2.44-2.35 (m, 3H), 1.39 (s, 3H).  $^{13}\text{C NMR}$  (100 MHz,  $\text{CDCl}_3$ )  $\delta$  205.4, 167.9, 161.8, 136.2, 134.9, 134.0, 132.2, 130.5, 127.73, 127.68, 124.1, 123.5, 123.4, 50.0, 45.0, 42.1, 39.4, 27.9. HRMS (ESI-TOF)  $m/z$ :  $[\text{M} + \text{Na}]^+$  Calcd for  $\text{C}_{22}\text{H}_{19}\text{NNaO}_3$ , 368.1257; found 368.1231. Enantiomeric excess was determined by HPLC with double Chiralpak AS-H column (hexanes:2-propanol = 90:10, 1 mL/min, 210 nm, 95:5 er); major enantiomer  $t_r = 64.1$  min, minor enantiomer  $t_r = 74.3$  min.

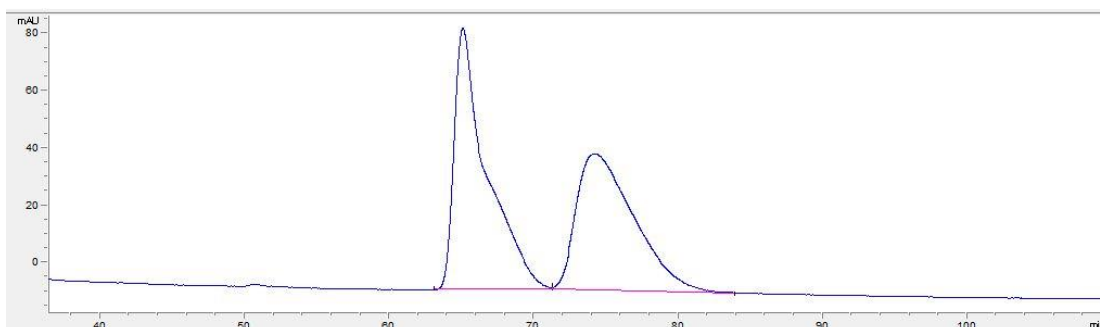

|   | Time/min | Area    | Height | Area% |
|---|----------|---------|--------|-------|
| 1 | 65.069   | 14213.7 | 91.2   | 51.5  |
| 2 | 74.218   | 13281.6 | 47.9   | 48.5  |

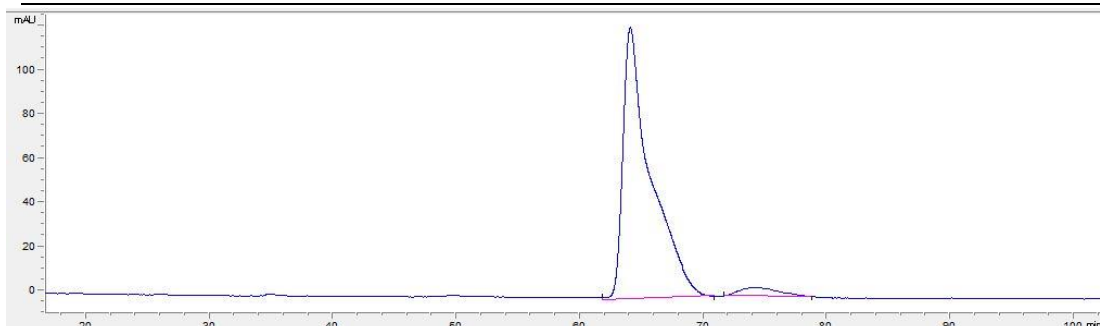

|   | Time/min | Area    | Height | Area% |
|---|----------|---------|--------|-------|
| 1 | 64.093   | 18933.1 | 122.8  | 95.0  |
| 2 | 74.37    | 1004.1  | 4.2    | 5.0   |

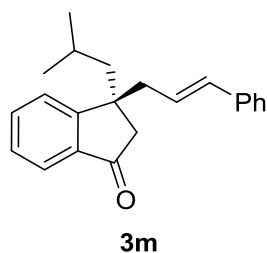

### 3-cinnamyl-3-isobutyl-2,3-dihydro-1*H*-inden-1-one

The mobile phase for flash chromatography: hexane/ethyl acetate = 60:1. Colorless oil (41.3 mg, 65%).  $[\alpha]_D^{25} = +26.1$  ( $c = 0.34$ ,  $\text{CHCl}_3$ ).  $^1\text{H NMR}$  (400 MHz,  $\text{CDCl}_3$ )  $\delta$  7.64 (d,  $J = 7.6$  Hz, 1H), 7.56-7.52 (m, 1H), 7.44 (d,  $J = 7.6$  Hz, 1H), 7.31 (d,  $J = 7.6$  Hz, 1H), 7.18-7.07 (m, 5H), 6.27 (d,  $J = 16.0$  Hz, 1H), 5.79-5.71 (m, 1H), 2.61-2.47 (m, 4H), 1.78 (dd,  $J = 14.0, 4.4$  Hz, 1H), 1.61 (dd,  $J = 14.0, 7.2$  Hz, 1H), 1.50-1.41 (m, 1H), 0.81 (d,  $J = 6.4$  Hz, 3H), 0.52 (d,  $J = 6.8$  Hz, 3H).  $^{13}\text{C NMR}$  (100 MHz,  $\text{CDCl}_3$ )  $\delta$  206.0, 161.1, 137.2, 137.1, 134.7, 134.1, 128.6, 127.8, 127.4, 126.2, 125.4, 124.7, 123.5, 49.1, 47.5, 46.2, 45.6, 25.3, 25.2, 24.2. HRMS (ESI-TOF)  $m/z$ :  $[\text{M} + \text{Na}]^+$  Calcd for  $\text{C}_{22}\text{H}_{24}\text{NaO}$ , 327.1719; found 327.1699. Enantiomeric excess was determined by HPLC with a Chiralpak OD-H column (hexane:2-propanol = 95:5, 0.6 mL/min, 254 nm, 90:10 er); major enantiomer  $t_r = 11.1$  min, minor enantiomer  $t_r = 12.3$  min.

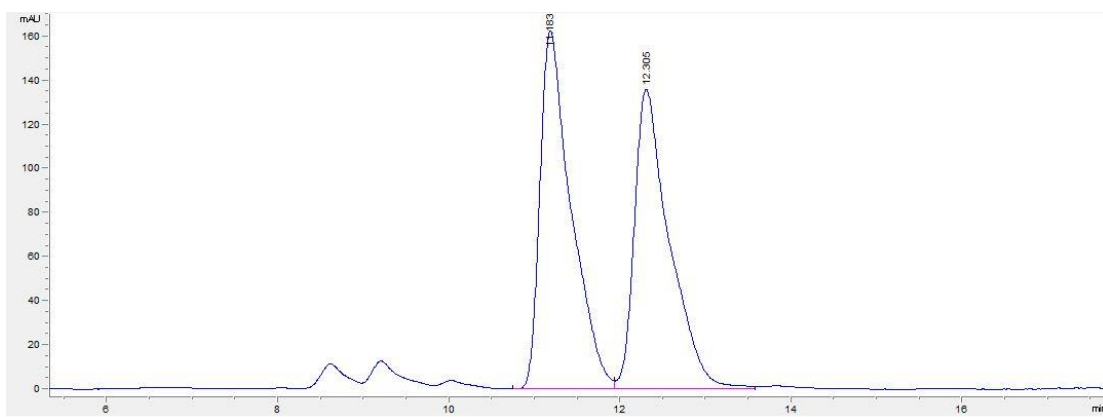

|   | Time/min | Area   | Height | Area%  |
|---|----------|--------|--------|--------|
| 1 | 11.183   | 4110.8 | 162.1  | 51.531 |
| 2 | 12.305   | 3866.6 | 136    | 48.469 |

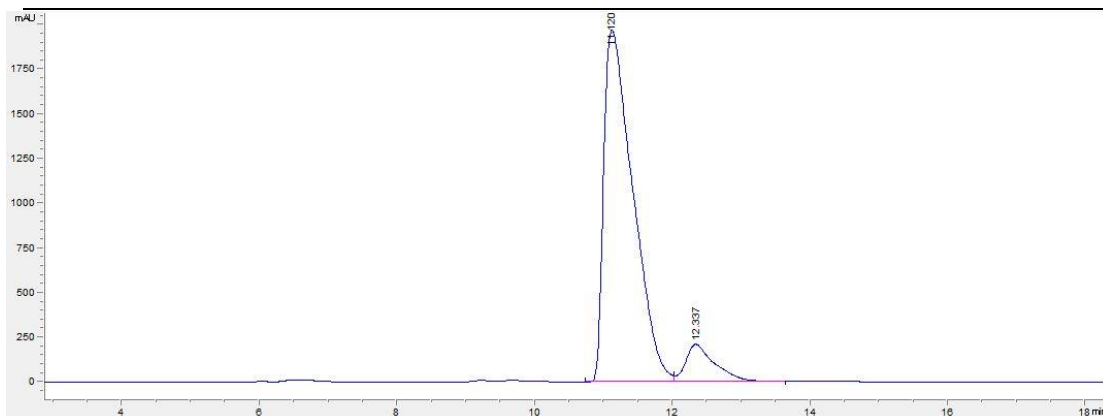

|   | Time/min | Area    | Height | Area%  |
|---|----------|---------|--------|--------|
| 1 | 11.12    | 58025.6 | 1967.7 | 90.214 |
| 2 | 12.337   | 6294.1  | 210.3  | 9.786  |

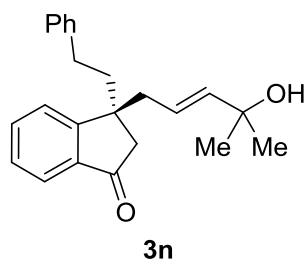

**(E)-3-(4-hydroxy-4-methylpent-2-en-1-yl)-3-phenethyl-2,3-dihydro-1H-inden-1-one**

The mobile phase for flash chromatography: hexane/ethyl acetate = 20:1 to 5:1. Colorless oil (30.6 mg, 46%).  $[\alpha]_D^{25} = +31.9$  (c = 1.01, CHCl<sub>3</sub>). <sup>1</sup>H NMR (400 MHz, CDCl<sub>3</sub>) δ 7.72 (d, *J* = 7.6 Hz, 1H), 7.66-7.61 (m, 1H), 7.49 (d, *J* = 7.6 Hz, 1H), 7.42-7.37 (m, 1H), 7.27-7.21 (m, 2H), 7.19-7.13 (m, 1H), 7.07 (d, *J* = 7.2 Hz, 2H), 5.57 (d,

$J = 15.2$  Hz, 1H), 5.28 (dt,  $J = 15.2, 7.2$  Hz, 1H), 2.64 (s, 2H), 2.57-2.45 (m, 3H), 2.26 (td,  $J = 12.4, 4.4$  Hz, 1H), 2.17-2.00 (m, 2H), 1.17 (s, 3H), 1.16 (s, 3H).  $^{13}\text{C}$  NMR (100 MHz,  $\text{CDCl}_3$ )  $\delta$  205.7, 160.2, 143.0, 141.8, 137.3, 135.0, 128.6, 128.3, 127.9, 126.1, 124.3, 123.5, 121.5, 70.6, 47.1, 46.1, 43.9, 42.3, 31.2, 29.8, 29.7. HRMS (ESI-TOF)  $m/z$ :  $[\text{M} + \text{Na}]^+$  Calcd for  $\text{C}_{23}\text{H}_{26}\text{NaO}_2$ , 357.1825; found 357.1817. Enantiomeric excess was determined by HPLC with a Chiralpak AS-H column (hexane:2-propanol 90:10, 0.5 mL/min, 254 nm, 95:5 er); major enantiomer  $t_r = 15.6$  min, minor enantiomer  $t_r = 19.8$  min.

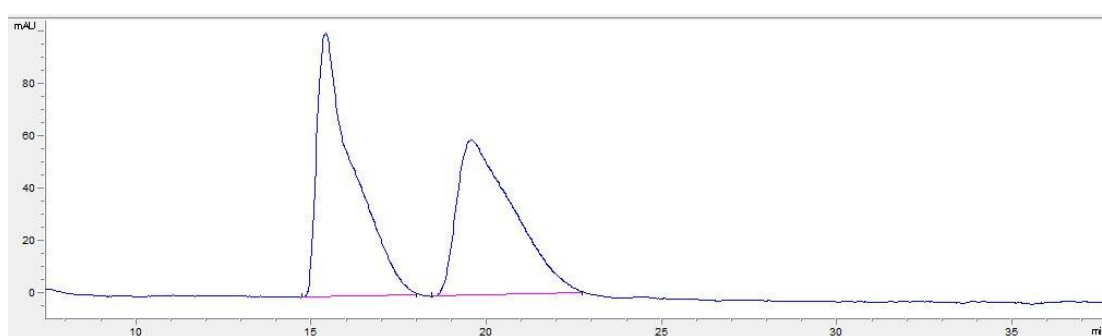

|   | Time/min | Area   | Height | Area% |
|---|----------|--------|--------|-------|
| 1 | 15.396   | 7208.5 | 100.4  | 52.0  |
| 2 | 19.543   | 6637   | 59.3   | 48.0  |

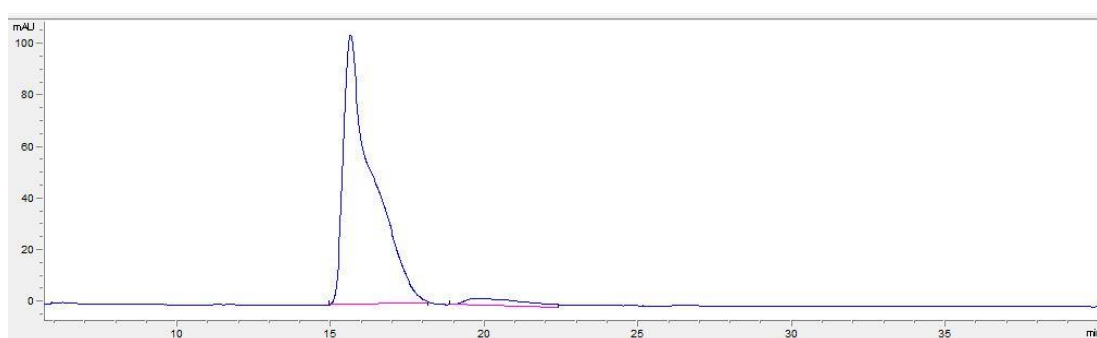

|   | Time/min | Area  | Height | Area% |
|---|----------|-------|--------|-------|
| 1 | 15.619   | 6874  | 104.6  | 95.0  |
| 2 | 19.823   | 362.2 | 2.6    | 5.0   |

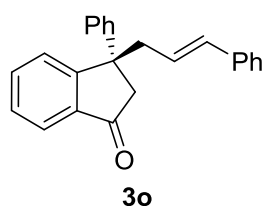

### 3-cinnamyl-3-phenyl-2,3-dihydro-1*H*-inden-1-one

The mobile phase for flash chromatography: hexane/ethyl acetate = 30:1. Light yellow oil (47.4 mg, 73%).  $[\alpha]_D^{25} = -25.7$  ( $c = 0.36$ ,  $\text{CHCl}_3$ ).  $^1\text{H NMR}$  (400 MHz,  $\text{CDCl}_3$ )  $\delta$  7.71 (d,  $J = 7.6$  Hz, 1H), 7.54 (td,  $J = 7.6, 1.6$  Hz, 1H), 7.38-7.32 (m, 2H), 7.26-7.05 (m, 10H), 6.32 (d,  $J = 16.0$  Hz, 1H), 5.72 (dt,  $J = 16.0, 7.2$  Hz, 1H), 3.07-2.99 (m, 3H), 2.85 (d,  $J = 18.8$  Hz, 1H).  $^{13}\text{C NMR}$  (100 MHz,  $\text{CDCl}_3$ )  $\delta$  205.4, 160.1, 146.4, 137.1, 137.0, 135.1, 134.6, 128.8, 128.6, 128.2, 127.5, 126.7, 126.4, 126.2, 125.1, 123.6, 52.6, 50.2, 43.8. HRMS (ESI-TOF)  $m/z$ :  $[\text{M} + \text{Na}]^+$  Calcd for  $\text{C}_{24}\text{H}_{20}\text{NaO}$ , 347.1406; found 347.1399. Enantiomeric excess was determined by HPLC with Chiralpak OD-H column (hexanes: 2-propanol = 95:5, 0.8 mL/min, 270 nm, 91:9 er); major enantiomer  $t_r = 22.9$  min, minor enantiomer  $t_r = 36.5$  min.

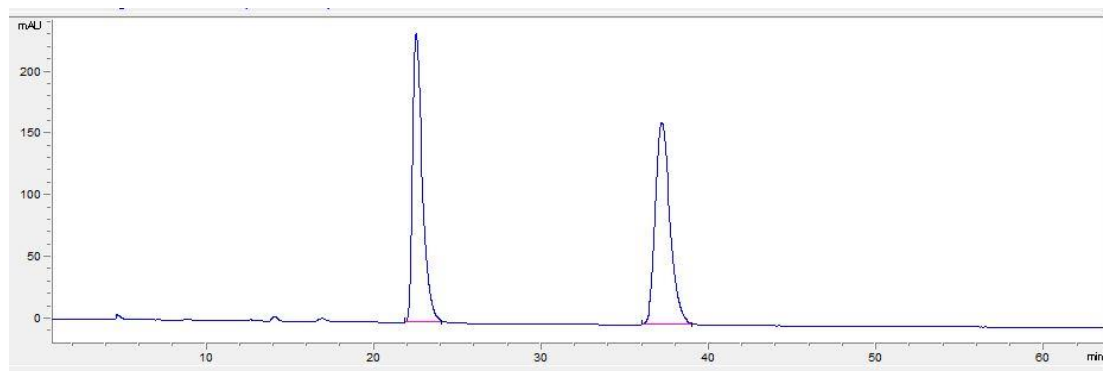

|   | Time/min | Area   | Height | Area% |
|---|----------|--------|--------|-------|
| 1 | 22.494   | 9541.5 | 233.6  | 49.0  |
| 2 | 37.163   | 9921.4 | 163.8  | 51.0  |

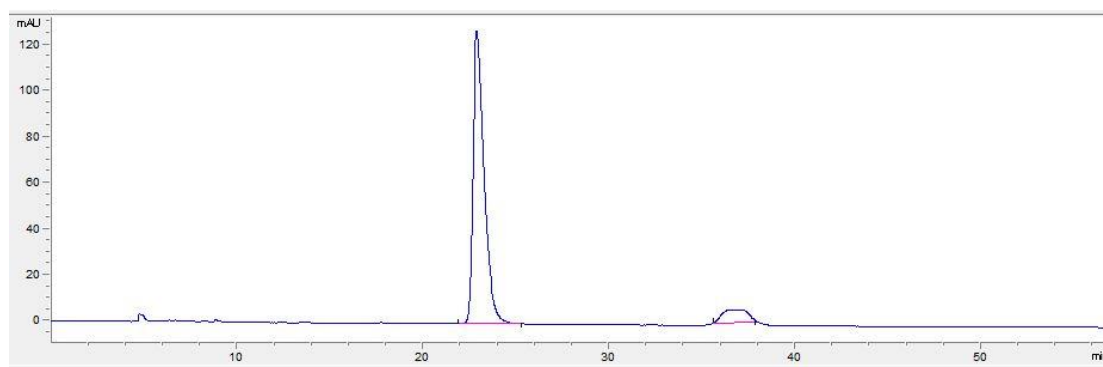

|   | Time/min | Area   | Height | Area% |
|---|----------|--------|--------|-------|
| 1 | 22.89    | 5370.5 | 127.2  | 91.0  |
| 2 | 36.497   | 535.1  | 5.6    | 9.0   |

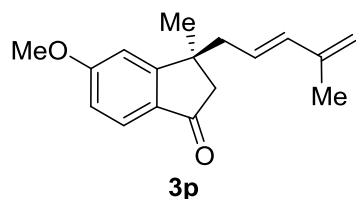

**(E)-5-methoxy-3-methyl-3-(4-methylpenta-2,4-dien-1-yl)-2,3-dihydro-1H-inden-1-one**

The mobile phase for flash chromatography: hexane/ethyl acetate = 30:1. Colorless oil (31.1 mg, 61%).  $[\alpha]_D^{25} = +17.8$  (c = 0.28, CHCl<sub>3</sub>). <sup>1</sup>H NMR (400 MHz, CDCl<sub>3</sub>) δ 7.64 (d, *J* = 8.4 Hz, 1H), 6.92-6.86 (m, 2H), 6.13 (d, *J* = 15.6 Hz, 1H), 5.36 (dt, *J* = 15.6, 7.6 Hz, 1H), 4.87 (s, 1H), 4.86 (s, 1H), 3.86 (s, 3H), 2.69 (d, *J* = 18.8 Hz, 1H), 2.46-2.37 (m, 3H), 1.71 (s, 3H), 1.41 (s, 3H). <sup>13</sup>C NMR (100 MHz, CDCl<sub>3</sub>) δ 203.9, 165.5, 165.2, 141.7, 136.9, 129.6, 125.4, 125.3, 115.8, 115.2, 107.6, 55.8, 50.2, 45.6, 42.2, 28.0, 18.7. HRMS (ESI-TOF) *m/z*: [M + Na]<sup>+</sup> Calcd for C<sub>17</sub>H<sub>20</sub>NaO<sub>2</sub>, 279.1356; found 279.1369. Enantiomeric excess was determined by HPLC with double Chiralpak OX-H column (hexane:2-propanol 95:5, 0.8 mL/min, 270 nm, 94.5:5.5 er); major enantiomer *tr* = 31.9 min, minor enantiomer *tr* = 33.5 min.

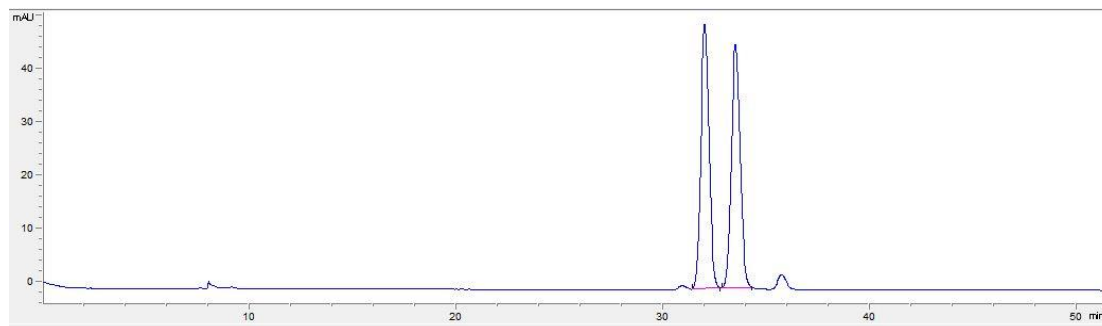

|   | Time/min | Area   | Height | Area% |
|---|----------|--------|--------|-------|
| 1 | 31.988   | 1377.1 | 49.4   | 50.5  |
| 2 | 33.478   | 1359.5 | 45.6   | 49.5  |

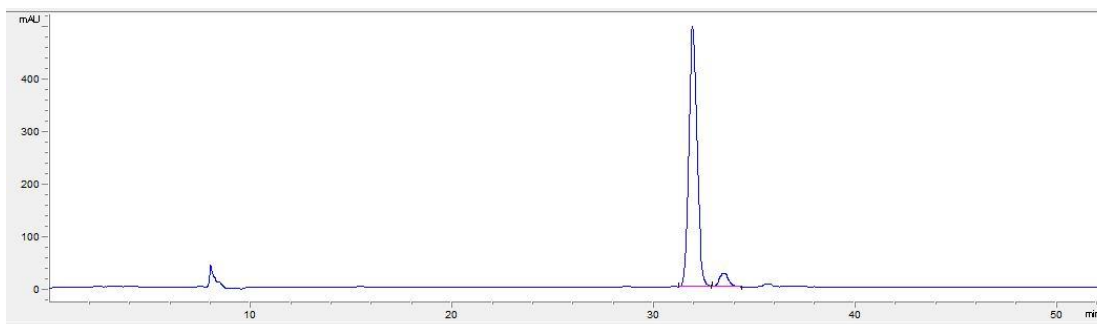

|   | Time/min | Area    | Height | Area% |
|---|----------|---------|--------|-------|
| 1 | 31.914   | 14072.2 | 494.9  | 94.5  |
| 2 | 33.463   | 827.4   | 26     | 5.5   |

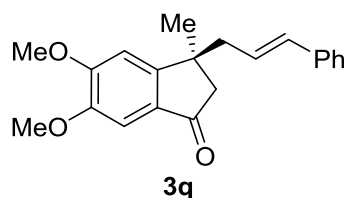

### 3-cinnamyl-5,6-dimethoxy-3-methyl-2,3-dihydro-1H-inden-1-one

The mobile phase for flash chromatography: hexane/ethyl acetate = 20:1 to 6:1. Colorless oil (53.9 mg, 84%).  $[\alpha]_D^{25} = +6.3$  (c = 0.34, CHCl<sub>3</sub>). <sup>1</sup>H NMR (400 MHz, CDCl<sub>3</sub>) δ 7.24-7.10 (m, 5H), 7.07 (s, 1H), 6.81 (s, 1H), 6.32 (d, *J* = 15.6 Hz, 1H), 5.92-5.85 (m, 1H), 3.89 (s, 3H), 3.84 (s, 3H), 2.68 (d, *J* = 18.8 Hz, 1H), 2.52-2.44 (m, 2H), 2.38 (d, *J* = 18.8 Hz, 1H), 1.39 (s, 3H). <sup>13</sup>C NMR (100 MHz, CDCl<sub>3</sub>) δ 204.0, 157.3, 155.6, 149.6, 137.1, 133.9, 129.1, 128.6, 127.4, 126.2, 125.7, 105.0, 104.0, 56.3, 56.2, 50.1, 45.8, 42.1, 28.1. HRMS (ESI-TOF) *m/z*: [M + Na]<sup>+</sup> Calcd for C<sub>21</sub>H<sub>22</sub>NaO<sub>3</sub>, 345.1461; found 345.1457. Enantiomeric excess was determined by HPLC with a Chiralpak OX-H column (hexane:2-propanol = 60:40, 1.0 mL/min, 254 nm, 92:8 er); major enantiomer *tr* = 7.0 min, minor enantiomer *tr* = 7.5 min.

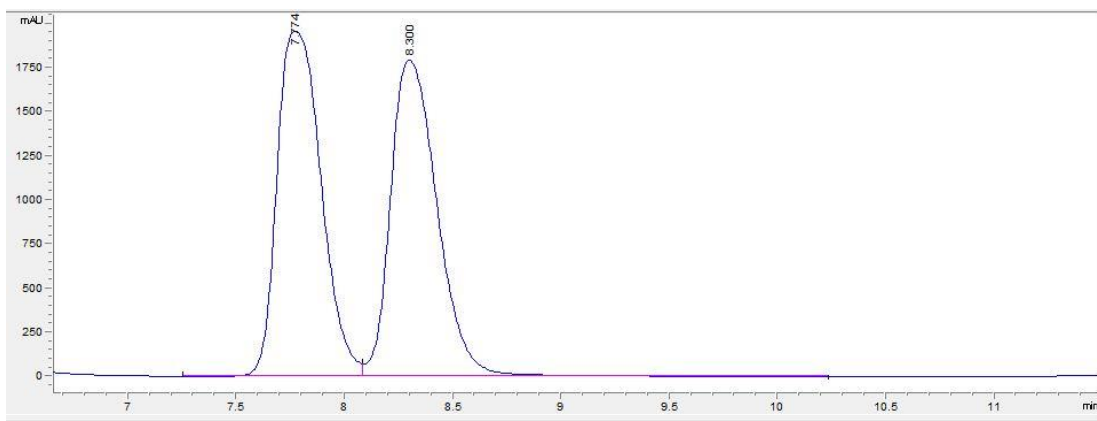

|   | Time/min | Area    | Height | Area%  |
|---|----------|---------|--------|--------|
| 1 | 7.774    | 27725   | 1956.5 | 50.743 |
| 2 | 8.3      | 26912.5 | 1792.9 | 49.257 |

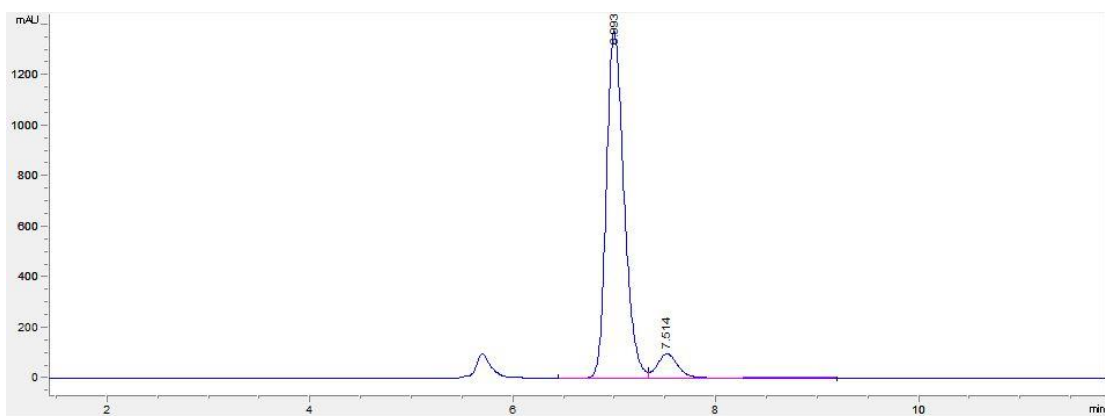

|   | Time/min | Area    | Height | Area%  |
|---|----------|---------|--------|--------|
| 1 | 6.993    | 16626.6 | 1374.2 | 92.129 |
| 2 | 7.514    | 1420.5  | 97     | 7.871  |

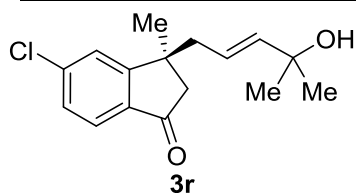

**(E)-5-chloro-3-(4-hydroxy-4-methylpent-2-en-1-yl)-3-methyl-2,3-dihydro-1H-inden-1-one**

The mobile phase for flash chromatography: hexane/ethyl acetate = 20:1. Colorless oil. (35.0 mg, 63%).  $[\alpha]_D^{25} = + 8.7$  (c = 0.36, CHCl<sub>3</sub>). <sup>1</sup>H NMR (400 MHz, CDCl<sub>3</sub>) δ 7.64 (d, *J* = 2.0 Hz, 1H), 7.57 (dd, *J* = 8.0, 2.0 Hz, 1H), 7.41 (d, *J* = 8.0 Hz, 1H), 5.57 (d, *J* = 15.6 Hz, 1H), 5.30 (td, *J* = 15.6, 7.6 Hz, 1H), 2.70 (d, *J* = 18.8 Hz, 1H), 2.44 (d, *J* =



18.8 Hz, 1H), 2.37 (d,  $J = 7.6$  Hz, 2H), 1.43 (s, 3H), 1.20 (s, 3H), 1.19 (s, 3H).  $^{13}\text{C}$  NMR (100 MHz,  $\text{CDCl}_3$ )  $\delta$  204.2, 160.0, 143.2, 137.9, 135.0, 134.2, 125.4, 123.2, 121.6, 70.7, 50.2, 45.0, 42.2, 29.9, 29.8, 27.9. HRMS (ESI-TOF)  $m/z$ :  $[\text{M} + \text{Na}]^+$  Calcd for  $\text{C}_{16}\text{H}_{19}\text{ClNaO}_2$ , 301.0966; found 301.0958. Enantiomeric excess was determined by HPLC with double Chiralpak AS-H column (hexanes:2-propanol = 90:10, 0.6 mL/min, 210 nm, 93.5:6.5 er); major enantiomer  $t_r = 39.8$  min, minor enantiomer  $t_r = 38.5$  min.

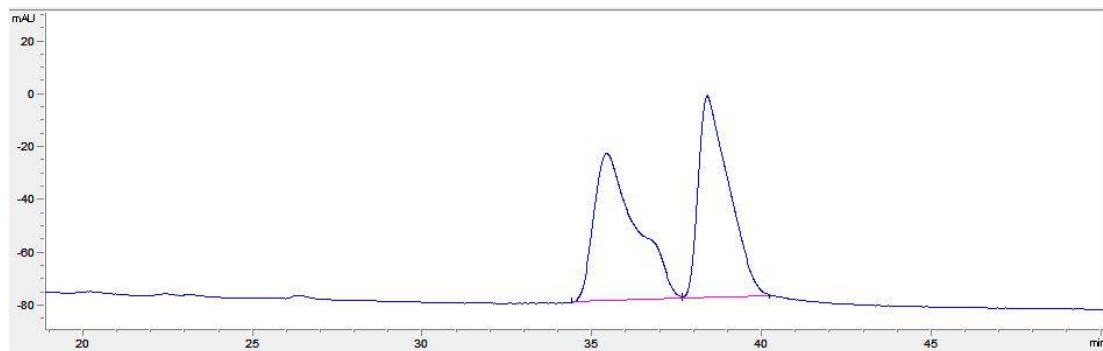

|   | Time/min | Area   | Height | Area% |
|---|----------|--------|--------|-------|
| 1 | 35.415   | 4840.4 | 56.2   | 50.0  |
| 2 | 38.386   | 4852   | 76.9   | 50.0  |

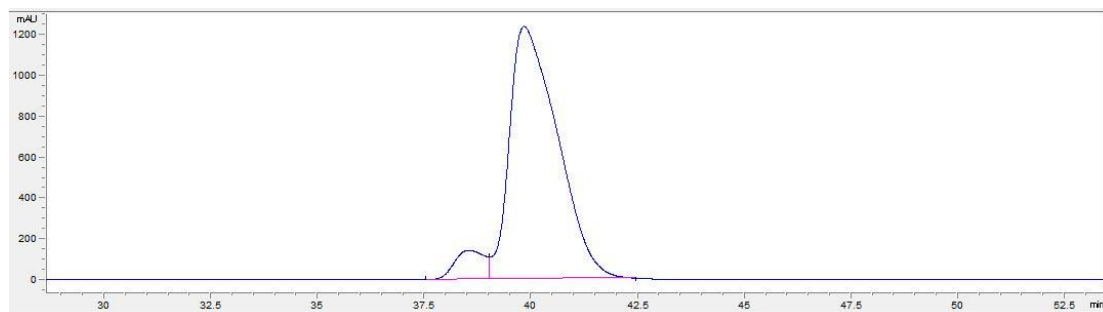

|   | Time/min | Area    | Height | Area% |
|---|----------|---------|--------|-------|
| 1 | 38.534   | 6999    | 141.9  | 6.5   |
| 2 | 39.833   | 96487.4 | 1236.2 | 93.5  |

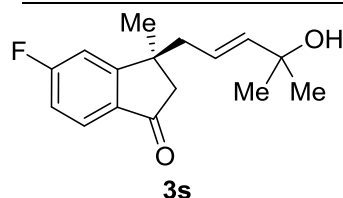

**(E)-5-fluoro-3-(4-hydroxy-4-methylpent-2-en-1-yl)-3-methyl-2,3-dihydro-1H-inden-1-one**

The mobile phase for flash chromatography: hexane/ethyl acetate = 20:1 to 5:1.

Colorless oil (36.2 mg, 69%).  $[\alpha]_D^{25} = +6.9$  ( $c = 0.34$ ,  $\text{CHCl}_3$ ).  $^1\text{H}$  NMR (400 MHz,

CDCl<sub>3</sub>) δ 7.69 (dd, *J* = 8.4, 5.2 Hz, 1H), 7.10 (dd, *J* = 8.8, 2.0 Hz, 1H), 7.06 (ddd, *J* = 8.8, 8.4, 2.0 Hz, 1H), 5.57 (d, *J* = 15.2 Hz, 1H), 5.30 (dt, *J* = 15.2, 7.2 Hz, 1H), 2.70 (d, *J* = 18.4 Hz, 1H), 2.44 (d, *J* = 18.4 Hz, 1H), 2.36 (d, *J* = 7.2 Hz, 2H), 1.43 (s, 3H), 1.19 (s, 3H), 1.18 (s, 3H). <sup>13</sup>C NMR (100 MHz, CDCl<sub>3</sub>) δ 203.8, 167.4 (d, *J* = 255.5 Hz), 165.0 (d, *J* = 8.8 Hz), 143.2, 132.8 (d, *J* = 1.9 Hz), 125.8 (d, *J* = 10.3 Hz), 121.5, 116.0 (d, *J* = 23.7 Hz), 110.8 (d, *J* = 22.0 Hz), 70.6, 50.1, 45.0, 42.3 (d, *J* = 2.0 Hz), 29.9, 29.8, 27.8. HRMS (ESI-TOF) *m/z*: [M + Na]<sup>+</sup> Calcd for C<sub>16</sub>H<sub>19</sub>FNaO<sub>2</sub>, 285.1261; found 285.1248. Enantiomeric excess was determined by HPLC with a Chiralpak AS-H column (hexane:2-propanol 90:10, 06 mL/min, 254 nm, 92.5:7.5 er); major enantiomer *tr* = 12.4 min, minor enantiomer *tr* = 15.2 min.

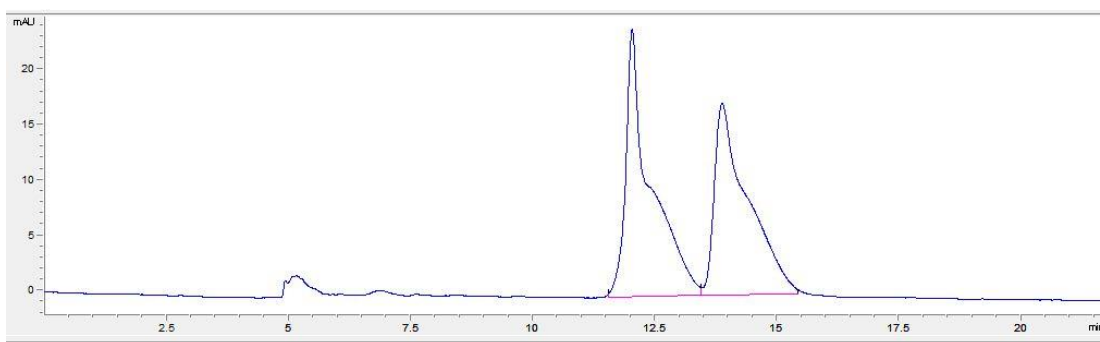

|   | Time/min | Area  | Height | Area% |
|---|----------|-------|--------|-------|
| 1 | 12.035   | 854.9 | 24.2   | 50.5  |
| 2 | 13.879   | 831.4 | 17.4   | 49.5  |

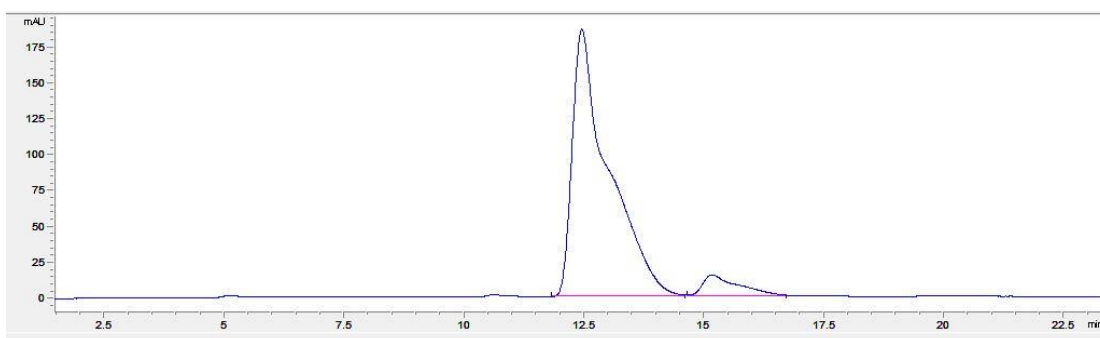

|   | Time/min | Area   | Height | Area% |
|---|----------|--------|--------|-------|
| 1 | 12.453   | 9795.4 | 186.1  | 92.5  |
| 2 | 15.165   | 777.6  | 14.9   | 7.5   |

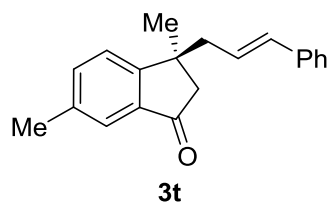

### 3-cinnamyl-3,6-dimethyl-2,3-dihydro-1H-inden-1-one

The mobile phase for flash chromatography: hexane/ethyl acetate = 60:1. Colorless oil (40.3 mg, 73%).  $[\alpha]_D^{25} = +20.2$  ( $c = 0.077$ ,  $\text{CHCl}_3$ ).  $^1\text{H NMR}$  (400 MHz,  $\text{CDCl}_3$ )  $\delta$  7.43 (s, 1H), 7.38-7.31 (m, 2H), 7.23-7.09 (m, 5H), 6.30 (d,  $J = 15.6$  Hz, 1H), 5.87 (dt,  $J = 15.6, 7.6$  Hz, 1H), 2.69 (d,  $J = 18.4$  Hz, 1H), 2.49-2.46 (m, 2H), 2.37 (d,  $J = 18.4$  Hz, 1H), 2.32 (s, 3H), 1.37 (s, 3H).  $^{13}\text{C NMR}$  (100 MHz,  $\text{CDCl}_3$ )  $\delta$  205.8, 159.7, 137.8, 137.3, 136.4, 136.3, 133.9, 128.6, 127.4, 126.3, 125.8, 123.8, 123.5, 50.4, 46.0, 42.2, 28.3, 21.2. HRMS (ESI-TOF)  $m/z$ :  $[\text{M} + \text{Na}]^+$  Calcd for  $\text{C}_{20}\text{H}_{20}\text{NaO}$ , 299.1406; found 299.1401. Enantiomeric excess was determined by HPLC with a Chiralpak OD-H column (hexane:2-propanol = 95:5, 1.0 mL/min, 254 nm, 94:6 er); major enantiomer  $t_r = 7.9$  min, minor enantiomer  $t_r = 10.3$  min.

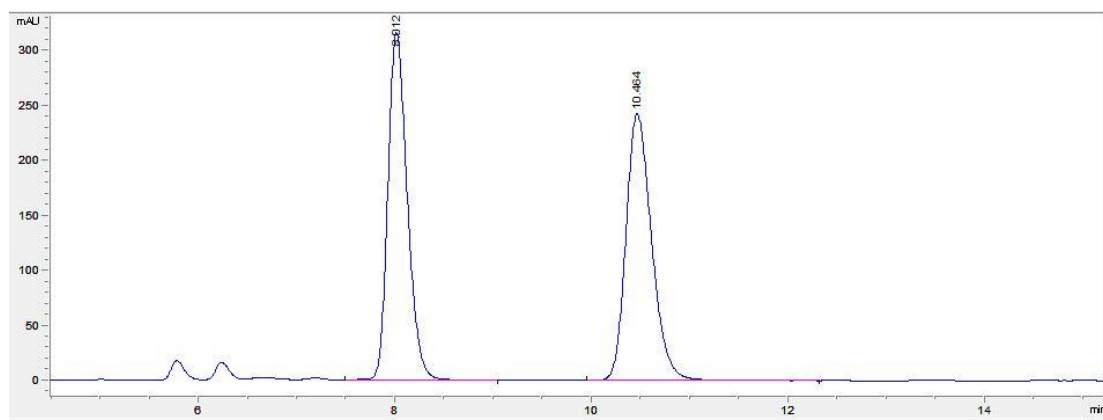

|   | Time/min | Area   | Height | Area%  |
|---|----------|--------|--------|--------|
| 1 | 7.94     | 3094.6 | 227.4  | 49.627 |
| 2 | 10.377   | 3141.1 | 174.2  | 50.373 |

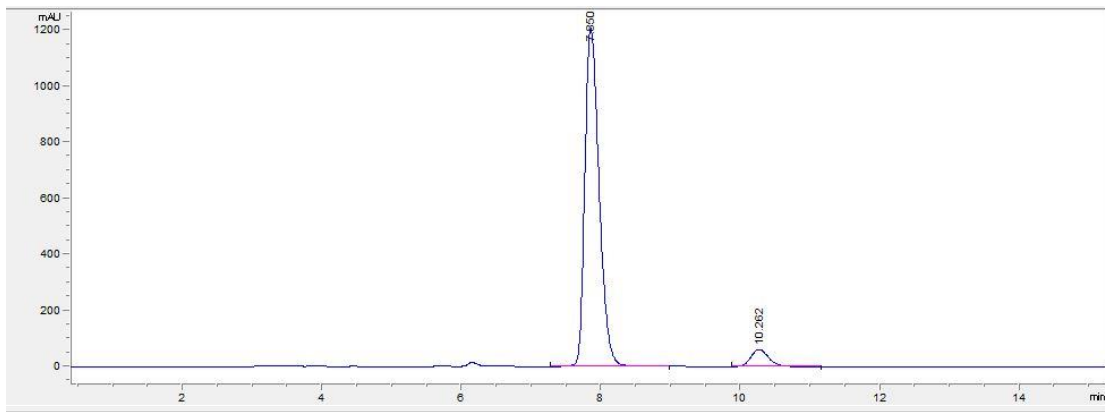

|   | Time/min | Area    | Height | Area%  |
|---|----------|---------|--------|--------|
| 1 | 7.85     | 17194.9 | 1207.6 | 94.051 |
| 2 | 10.262   | 1087.7  | 61.3   | 5.949  |

### Synthesis of (+)-herbertene-1,14-diol

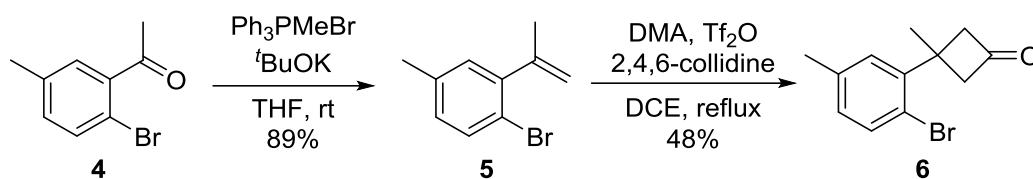

### 3-(2-bromo-5-methylphenyl)-3-methylcyclobutan-1-one **6**

A vial was charged with  $\text{Ph}_3\text{PMeBr}$  (18.32 g, 51.31 mmol, 2.0 eq),  $\text{KO}^t\text{Bu}$  (7.20 g, 64.16 mmol, 2.5 eq) and evacuated under high vacuum and backfilled with  $\text{N}_2$ . THF (100 mL) was added via syringe and the mixture was stirred at room temperature for 1 h. A solution of 1-(2-bromo-5-methylphenyl)ethan-1-one **4** (5.40 g, 25.66 mmol) in THF (20 mL) was added dropwise and the mixture was stirred at room temperature. After complete consumption of starting material (12 h, TLC, eluent: hexane), the mixture was extracted with ethyl acetate and water. The organic layer was separated, dried over  $\text{Na}_2\text{SO}_4$ , concentrated under reduced pressure and then purified by silica column (eluent: hexane) to get the product **5** (4.80 g, 89% yield) as the colorless oil.

Triflic anhydride (9.03 g, 32 mmol, 1.4 equiv) was added dropwise to a solution of *N,N*-dimethylacetamide (2.39 g, 27.4 mmol, 1.2 equiv) in 30 mL of 1,2-dichloroethane under stirring at 5 °C. The mixture was stirred at 5 °C for 30 min, and then a mixture of **5** (4.8 g, 22.86 mmol, 1.0 equiv) and 2,4,6-collidine (4.59 g, 32 mmol, 1.4 equiv) in 5 mL of 1,2-dichloroethane was added dropwise. After the reaction mixture was refluxed for 18 h, 1,2-dichloromethane was removed in vacuum and the residue was treated with 8 mL  $\text{H}_2\text{O}$  and  $\text{CCl}_4$  (1:1). The obtained mixture was refluxed for 18 h, and 30 mL of water was added. The mixture was extracted with  $\text{CH}_2\text{Cl}_2$  (3 × 50 mL), and the combined organic layers was washed with 200 mL of saturated brine, dried over  $\text{Na}_2\text{SO}_4$  and filtered. Concentration of the solution by rotary evaporation under reduced pressure gave a residue, which was purified by silica gel (petroleum ether: EtOAc= 25:1) to afford **6** as yellow oil (2.78 g, 48% yield).  $^1\text{H}$ NMR (400 MHz,  $\text{CDCl}_3$ )  $\delta$  7.45 (d,  $J$  = 8.0 Hz, 1H), 7.09 (d,  $J$  = 2.0 Hz, 1H), 6.93 (dd,  $J$  = 8.0, 2.0 Hz, 1H), 3.56-3.49 (m, 2H), 3.23-3.17 (m, 2H), 2.32 (s, 3H), 1.61 (s, 3H).  $^{13}\text{C}$  NMR (100 MHz,  $\text{CDCl}_3$ )  $\delta$  206.9, 145.6, 137.7, 134.2, 129.3, 129.1, 118.9, 59.3, 36.2, 27.9, 21.1. HRMS (ESI-TOF)  $m/z$ :

$[M + Na]^+$  Calcd for  $C_{12}H_{13}BrNaO$ , 275.0042; found 275.0057.

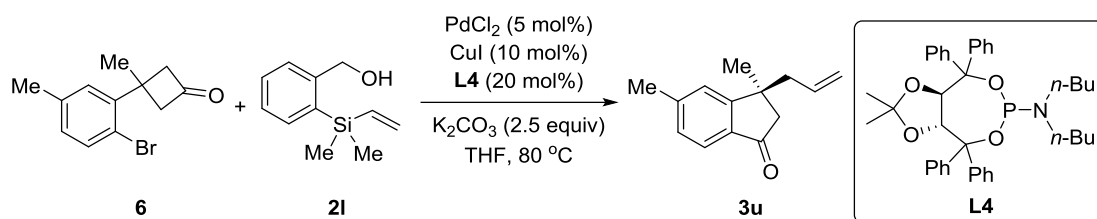

### 3-allyl-3,5-dimethyl-2,3-dihydro-1*H*-inden-1-one **3u**

A vial was charged with  $PdCl_2$  (88.0 mg, 0.50 mmol),  $CuI$  (190.4 mg, 1.0 mmol), **L4** (1.25 g, 2.0 mmol), and  $K_2CO_3$  (3.45 g, 25.0 mmol), and evacuated under high vacuum and backfilled with  $N_2$ . THF (25 mL) was added via syringe and the mixture was stirred at room temperature for 20 min. A solution of **6** (2.5 g, 10.0 mmol) and **2l** (2.30 g, 12.0 mmol) in THF (25 mL) was added via syringe and the mixture was stirred at 80 °C in an oil bath for 24 h, and then cooled to room temperature. The mixture was filtered over a plug of silica gel (washed with 100 mL EtOAc), and the filtrate was concentrated under reduced pressure and then purified by silica column to get the product **3u**.

The mobile phase for flash chromatography: hexane/ethyl acetate = 50:1. Colorless oil (1.06 g, 52%).  $[\alpha]_D^{25} = +26.6$  ( $c = 0.28$ ,  $CHCl_3$ ).  $^1H$  NMR (400 MHz,  $CDCl_3$ )  $\delta$  7.52 (d,  $J = 8.0$  Hz, 1H), 7.19 (s, 1H), 7.11 (d,  $J = 8.0$  Hz, 1H), 5.50-5.38 (m, 1H), 5.00-4.93 (m, 2H), 2.64 (d,  $J = 18.4$  Hz, 1H), 2.40-2.30 (m, 6H), 1.34 (s, 3H).  $^{13}C$  NMR (100 MHz,  $CDCl_3$ )  $\delta$  205.4, 162.8, 146.2, 134.1, 134.0, 129.0, 124.3, 123.3, 118.9, 49.9, 46.6, 41.7, 28.3, 22.4. HRMS (ESI-TOF)  $m/z$ :  $[M + Na]^+$  Calcd for  $C_{14}H_{16}NaO$ , 223.1093; found 223.1086. Enantiomeric excess was determined by HPLC with a Chiralpak OX-H column (hexanes: 2-propanol = 95:5, 1.2 mL/min, 254 nm, 96:4 er); major enantiomer  $t_r = 27.1$  min, minor enantiomer  $t_r = 29.1$  min.

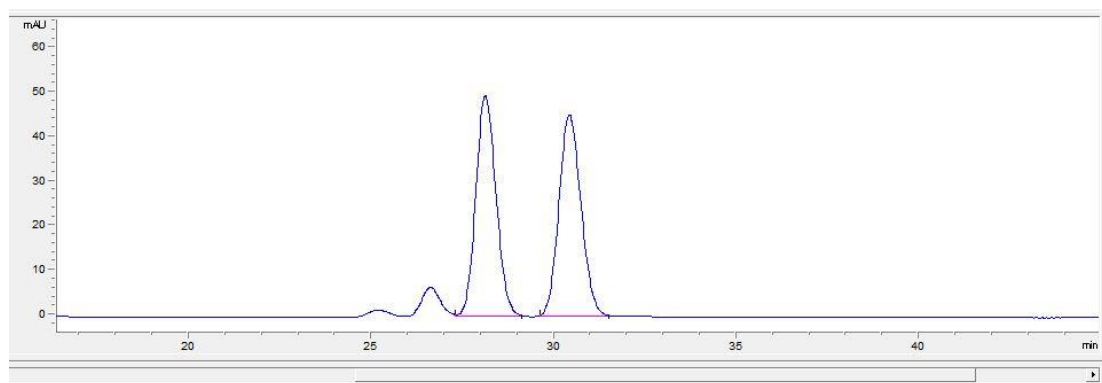

|   | Time/min | Area   | Height | Area%  |
|---|----------|--------|--------|--------|
| 1 | 28.119   | 1912.7 | 49.7   | 50.014 |
| 2 | 30.423   | 1911.7 | 45.2   | 49.986 |

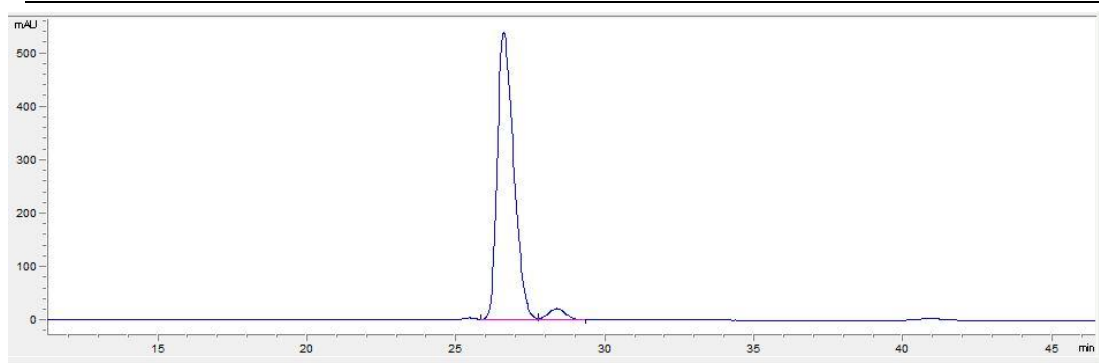

|   | Time/min | Area    | Height | Area%  |
|---|----------|---------|--------|--------|
| 1 | 26.581   | 20725.4 | 537.2  | 96.060 |
| 2 | 28.361   | 850.1   | 21.1   | 3.940  |

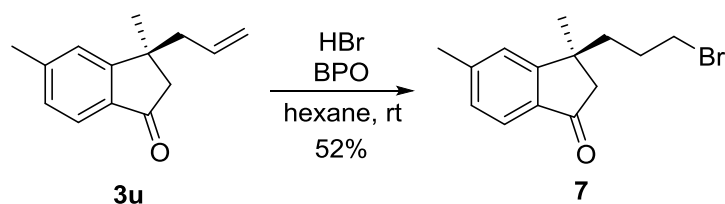

### 3-(3-bromopropyl)-3,5-dimethyl-2,3-dihydro-1*H*-inden-1-one **7**

A vigorously stirred solution of compound **3u** (211.4 mg, 1.05 mmol) and dibenzoylperoxide (9.6 mg, 0.042 mmol) in dry *n*-hexane (10 mL) was treated with dry HBr gas for 2 h, produced by the addition of bromine (0.5 mL) to tetraline (15 mL), and the mixture was stirred overnight. Petroleum ether (10 mL), ethyl acetate (10 mL), and brine (10 mL) were added and separated. The aqueous layer was extracted by ethyl acetate (20 mL). The combined organic layers were dried over Na<sub>2</sub>SO<sub>4</sub> and filtered, and the filtrate was concentrated under reduced pressure and then purified by silica column to get the product **7**.

The mobile phase for flash chromatography: hexane/ethyl acetate = 50:1. Colorless oil (150.4 mg, 51%).  $[\alpha]_{\text{D}}^{25} = +6.7$  ( $c = 3.14$ , CHCl<sub>3</sub>). <sup>1</sup>H NMR (400 MHz, CDCl<sub>3</sub>)  $\delta$  7.59 (d,  $J = 8.0$  Hz, 1H), 7.24 (s, 1H), 7.18 (d,  $J = 8.0$  Hz, 1H), 3.31 (t,  $J = 6.0$  Hz, 2H), 2.63 (d,  $J = 18.8$  Hz, 1H), 2.46 (d,  $J = 18.8$  Hz, 1H), 2.45 (s, 3H), 1.90-1.73 (m, 3H), 1.54-1.43 (m, 1H), 1.41 (s, 3H). <sup>13</sup>C NMR (100 MHz, CDCl<sub>3</sub>)  $\delta$  205.1, 162.6, 146.4, 133.9,

129.1, 124.2, 123.4, 50.3, 41.5, 40.6, 33.9, 28.63, 28.57, 22.4. HRMS (ESI-TOF)  $m/z$ :  $[M + Na]^+$  Calcd for  $C_{14}H_{17}BrNaO$ , 303.0355; found 303.0363. Enantiomeric excess was determined by HPLC with a Chiralpak AS-H column (hexanes: 2-propanol = 80:20, 1 mL/min, 260 nm, 96.5:3.5 *er*); major enantiomer  $t_r$  = 10.6 min, minor enantiomer  $t_r$  = 13.2 min.

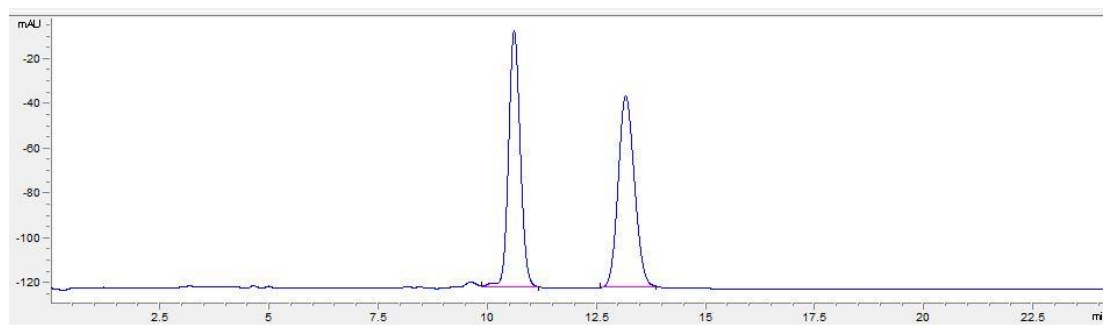

|   | Time/min | Area   | Height | Area% |
|---|----------|--------|--------|-------|
| 1 | 10.602   | 2153.6 | 114.5  | 49.0  |
| 2 | 13.162   | 2232.3 | 85.6   | 51.0  |

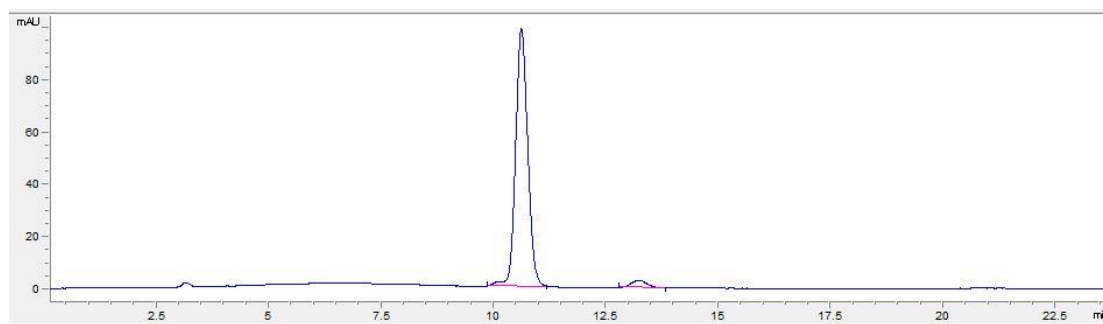

|   | Time/min | Area   | Height | Area% |
|---|----------|--------|--------|-------|
| 1 | 10.618   | 1861.5 | 98.6   | 96.5  |
| 2 | 13.228   | 70.5   | 2.9    | 3.5   |

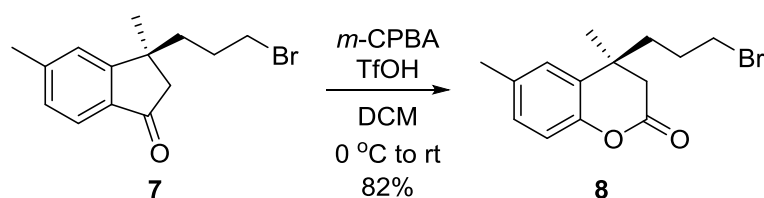

#### 4-(3-bromopropyl)-4,6-dimethylchroman-2-one 8

To a solution of **7** (60.0 mg, 0.214 mmol) in  $CH_2Cl_2$  (2 mL) was added TfOH (3.2 mg, 0.0214 mmol, 0.1 equiv) and *m*-CPBA (73.8 mg, 0.428 mmol, 2.0 equiv) at 0 °C. Then



the mixture was stirred at room temperature for 58 h. Water (5.0 mL) was then added and the aqueous layer was extracted with CH<sub>2</sub>Cl<sub>2</sub> (3 × 5 mL). The combined organic phase was dried over anhydrous Na<sub>2</sub>SO<sub>4</sub>, filtered and concentrated under vacuum. The residue was then purified by flash column chromatography to give product **8**.

The mobile phase for flash chromatography: hexane/ethyl acetate = 50:1. Colorless oil (52.2 g, 82% yield).  $[\alpha]_D^{25} = +30.0$  (c = 0.2, CHCl<sub>3</sub>). <sup>1</sup>H NMR (400 MHz, CDCl<sub>3</sub>) δ 7.08-7.02 (m, 2H), 6.95 (d, *J* = 8.0 Hz, 1H), 3.32 (t, *J* = 6.4 Hz, 2H), 2.68 (d, *J* = 16.0 Hz, 1H), 2.57 (d, *J* = 16.0 Hz, 1H), 2.35 (s, 3H), 1.88-1.79 (m, 1H), 1.77-1.63 (m, 3H), 1.36 (s, 3H). <sup>13</sup>C NMR (100 MHz, CDCl<sub>3</sub>) δ 168.4, 148.9, 134.4, 129.4, 129.1, 125.7, 117.1, 42.0, 38.8, 36.1, 33.5, 27.7, 25.3, 21.2. HRMS (ESI-TOF) *m/z*: [M + Na]<sup>+</sup> Calcd for C<sub>14</sub>H<sub>17</sub>BrNaO<sub>2</sub>, 319.0304; found 319.0315. Enantiomeric excess was determined by HPLC with a Chiralpak AS-H column (hexanes: 2-propanol = 80:20, 1 mL/min, 260 nm, 95.0:5.0 *er*); major enantiomer *tr* = 10.8 min, minor enantiomer *tr* = 12.2 min.

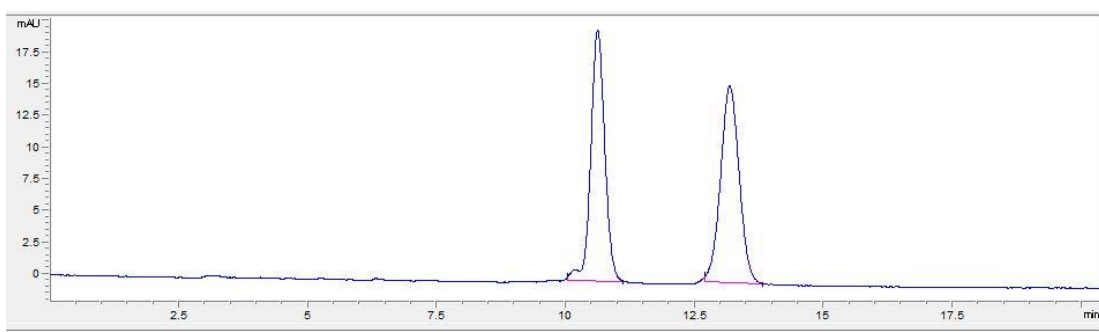

|   | Time/min | Area  | Height | Area% |
|---|----------|-------|--------|-------|
| 1 | 10.617   | 377   | 19.8   | 49.0  |
| 2 | 13.177   | 391.2 | 15.5   | 51.0  |

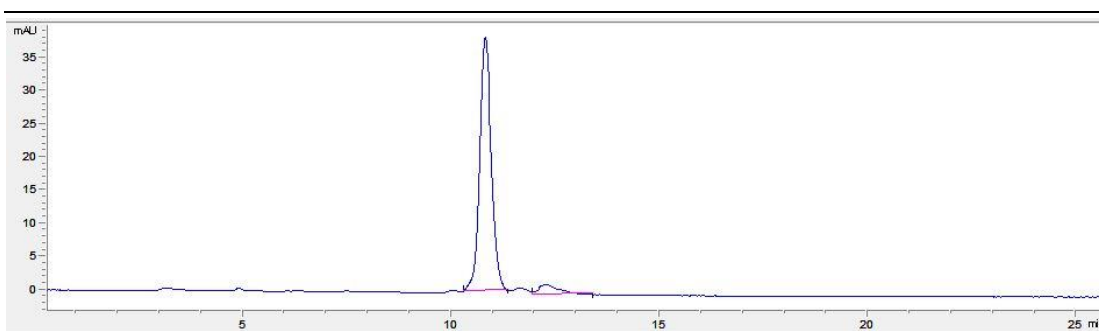

|   | Time/min | Area  | Height | Area%  |
|---|----------|-------|--------|--------|
| 1 | 10.811   | 753.7 | 38.2   | 94.743 |
| 2 | 12.274   | 41.8  | 1.4    | 5.257  |

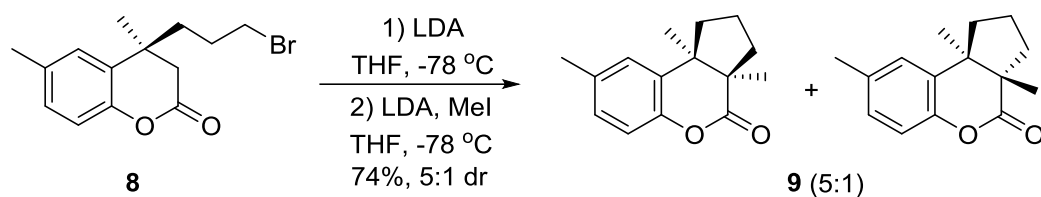

**(3*aR*,9*bR*)-3*a*,8,9*b*-trimethyl-2,3,3*a*,9*b*-tetrahydrocyclopenta[*c*]chromen-4(1*H*)-one 9**

LDA (0.11 mL, 0.211 mmol, 2.0 M in THF) was added dropwise to a solution of compound **8** (52.2 mg, 0.176 mmol) in dry THF (2 mL) under N<sub>2</sub> at -78 °C. The reaction mixture was stirred for 2 h at -78 °C. Then LDA (0.14 mL, 0.282 mmol, 2.0 M in THF) and MeI (21.7 μL, 0.35 mmol) were added, and the reaction was stirred at -78 °C for 5 h and at room temperature for 30 min. Water (5.0 mL) was added to the reaction mixture, and the organic layer was separated and aqueous layer was extracted with ethyl acetate (3 × 5 mL). The combined organic layer was washed with brine (5 mL), dried over Na<sub>2</sub>SO<sub>4</sub> and concentrated under vacuum. The residue was then purified by flash column chromatography to give product **9** as an inseparable diastereomers (5:1).

The mobile phase for flash chromatography: hexane/ethyl acetate = 50:1. Colorless oil (30.0 g, 74% yield). <sup>1</sup>H NMR (400 MHz, CDCl<sub>3</sub>) δ 7.11 (d, *J* = 2.0 Hz, 1H), 7.01 (dd, *J* = 8.0, 2.0 Hz, 1H), 6.89 (d, *J* = 8.0 Hz, 1H), 2.33 (s, 1H), 2.42-2.31 (m, 1H), 2.13-2.04 (m, 1H), 1.90-1.57 (m, 4H), 1.26 (s, 3H), 1.23 (s, 3H). <sup>13</sup>C NMR (100 MHz, CDCl<sub>3</sub>) δ 173.9, 147.6, 134.2, 128.7, 128.6, 127.0, 116.6, 51.1, 47.8, 39.0, 35.8, 21.8, 21.2, 20.7, 18.1; data matched that from the literature.<sup>3-4</sup> HRMS (ESI-TOF) *m/z*: [M + Na]<sup>+</sup> Calcd for C<sub>15</sub>H<sub>18</sub>NaO<sub>2</sub>, 253.1199; found 253.1194.

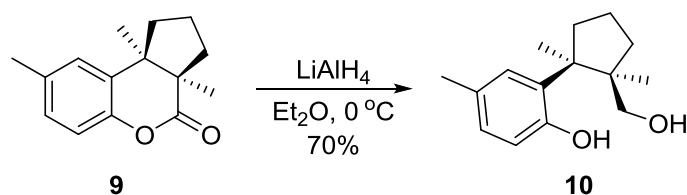

**2-((1*S*,2*R*)-2-(hydroxymethyl)-1,2-dimethylcyclopentyl)-4-methylphenol 10**

To a solution of **9** (19.1 mg, 0.083 mmol) in anhydrous Et<sub>2</sub>O (2.0 mL) at 0 °C was treated with LiAlH<sub>4</sub> (10.7 mg, 0.282 mmol). The reaction mixture was stirred for 30 min at 0 °C and 3 h at room temperature. Then isopropanol (5 mL) was added to quench

the reaction. Water (5.0 mL) was added, and the organic layer was separated and aqueous layer was extracted with ethyl acetate (3 × 5 mL) and the combined organic phase was dried over Na<sub>2</sub>SO<sub>4</sub>, filtered and concentrated to give the crude compound. Purification of crude compound by flash chromatography afforded **10**.

The mobile phase for flash chromatography: hexane/ethyl acetate = 20:1. White solid, m.p. 106-108 °C (CH<sub>2</sub>Cl<sub>2</sub>). (13.0 mg, 70% yield).  $[\alpha]_D^{25} = +11.0$  (c = 0.3, CHCl<sub>3</sub>). <sup>1</sup>H NMR (400 MHz, CDCl<sub>3</sub>) δ 6.96 (d, *J* = 2.1 Hz, 1H), 6.91 (dd, *J* = 8.0, 2.1 Hz, 1H), 6.73 (d, *J* = 8.0 Hz, 1H), 3.34 (d, *J* = 11.1 Hz, 1H), 3.27 (d, *J* = 11.0 Hz, 1H), 2.52-2.38 (m, 1H), 2.27 (s, 3H), 1.98-1.77 (m, 3H), 1.56 (s, 3H), 1.50-1.41 (m, 1H), 1.32-1.25 (m, 1H), 1.24 (s, 3H). <sup>13</sup>C NMR (100 MHz, CDCl<sub>3</sub>) δ 153.2, 133.0, 130.0, 129.3, 128.1, 117.9, 70.8, 51.0, 49.1, 42.5, 36.1, 24.1, 21.3, 21.1, 20.6; data matched that from the literature.<sup>3</sup> HRMS (ESI-TOF) *m/z*: [M + Na]<sup>+</sup> Calcd for C<sub>15</sub>H<sub>22</sub>NaO<sub>2</sub>, 257.1512; found 257.1508. Enantiomeric excess was determined by HPLC with a Chiralpak As-H column (hexanes: 2-propanol = 70.0:30.0, 1 mL/min, 260 nm, 3.5:96.5 *er*); major enantiomer *tr* = 18.8 min, minor enantiomer *tr* = 15.1 min.

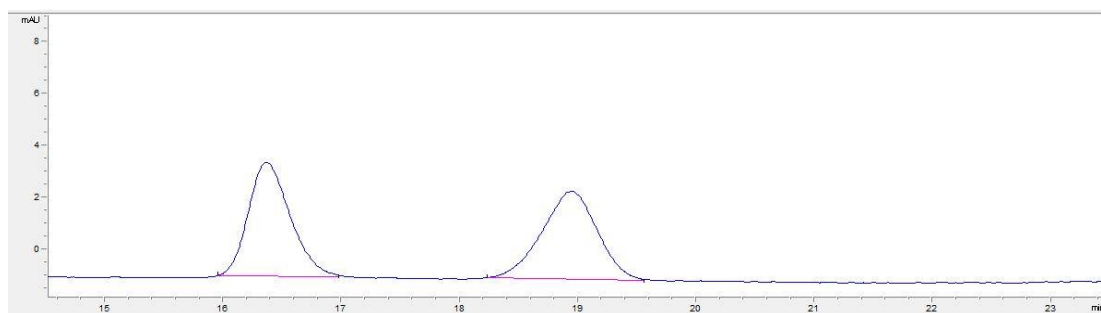

|   | Time/min | Area  | Height | Area% |
|---|----------|-------|--------|-------|
| 1 | 16.368   | 108.4 | 4.4    | 49.5  |
| 2 | 18.952   | 109.6 | 3.4    | 50.5  |

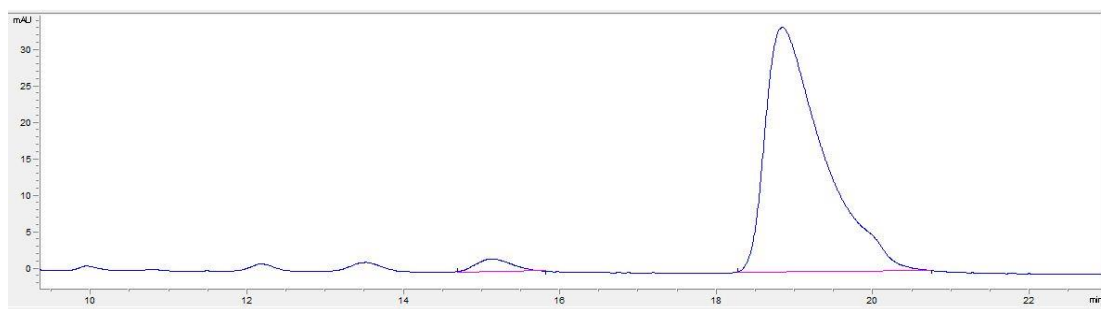

|   | Time/min | Area   | Height | Area% |
|---|----------|--------|--------|-------|
| 1 | 15.139   | 60.1   | 1.8    | 3.5   |
| 2 | 18.841   | 1732.6 | 33.6   | 96.5  |

## References

- 1 (a) J. Cao, L. Chen, F.-N. Sun, Y.-L. Sun, K.-Z. Jiang, K.-F. Yang, Z. Xu and L.-W. Xu, *Angew. Chem., Int. Ed.*, 2019, **58**, 897–901; (b) Y.-L. Sun, X.-B. Wang, F.-N. Sun, Q.-Q. Chen, J. Cao, Z. Xu and L.-W. Xu, *Angew. Chem., Int. Ed.*, 2019, **58**, 6747–6751.
- 2 (a) Y. Nakao, H. Imanaka, A. K. Sahoo, A. Yada and T. Hiyama, *J. Am. Chem. Soc.*, 2005, **127**, 6952–6953; (b) Y. Nakao, J. Chen, H. Imanaka, T. Hiyama, Y. Ichikawa, W.-L. Duan, R. Shintani and T. Hayashi, *J. Am. Chem. Soc.*, 2007, **129**, 9137–9143; (c) Y. Nakao, H. Imanaka, J. Chen, A. Yada and T. Hiyama, *J. Organomet. Chem.*, 2007, **692**, 585–603.
- 3 S. Acherar, G. Audran, F. Fotiadu and H. Monti, *Eur. J. Org. Chem.*, 2004, 5092–5099.
- 4 T. Eicher, F. Servet and A. Speicher, *Synthesis*, 1996, 863–870.

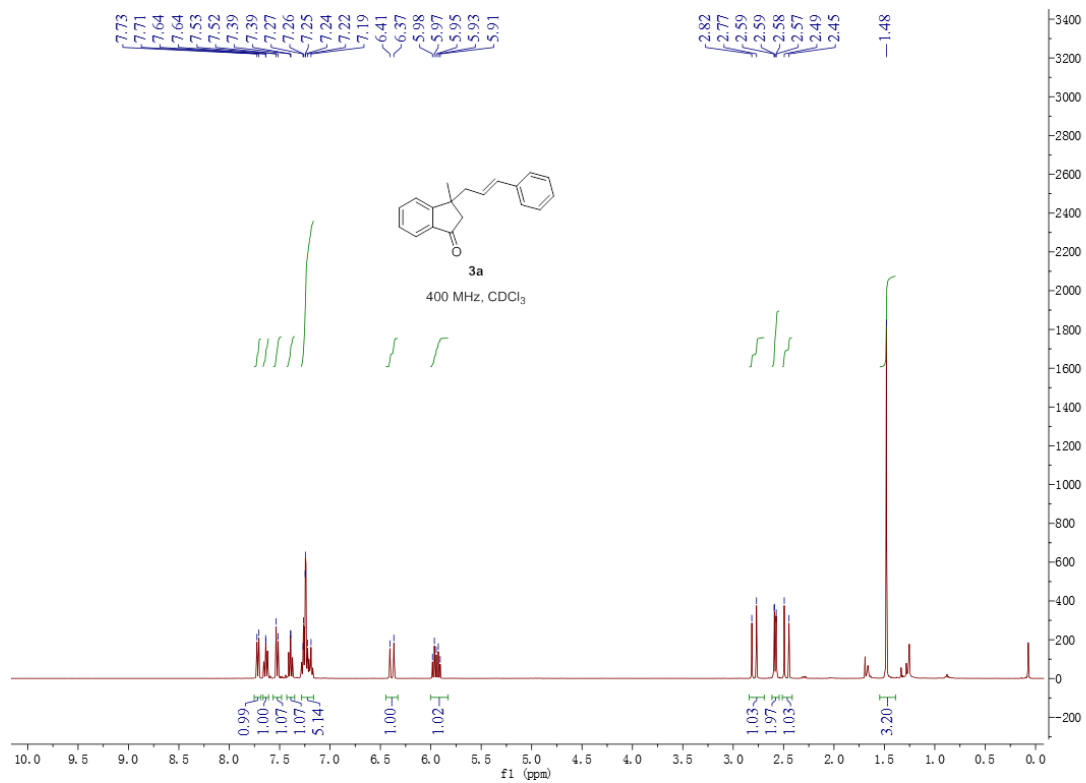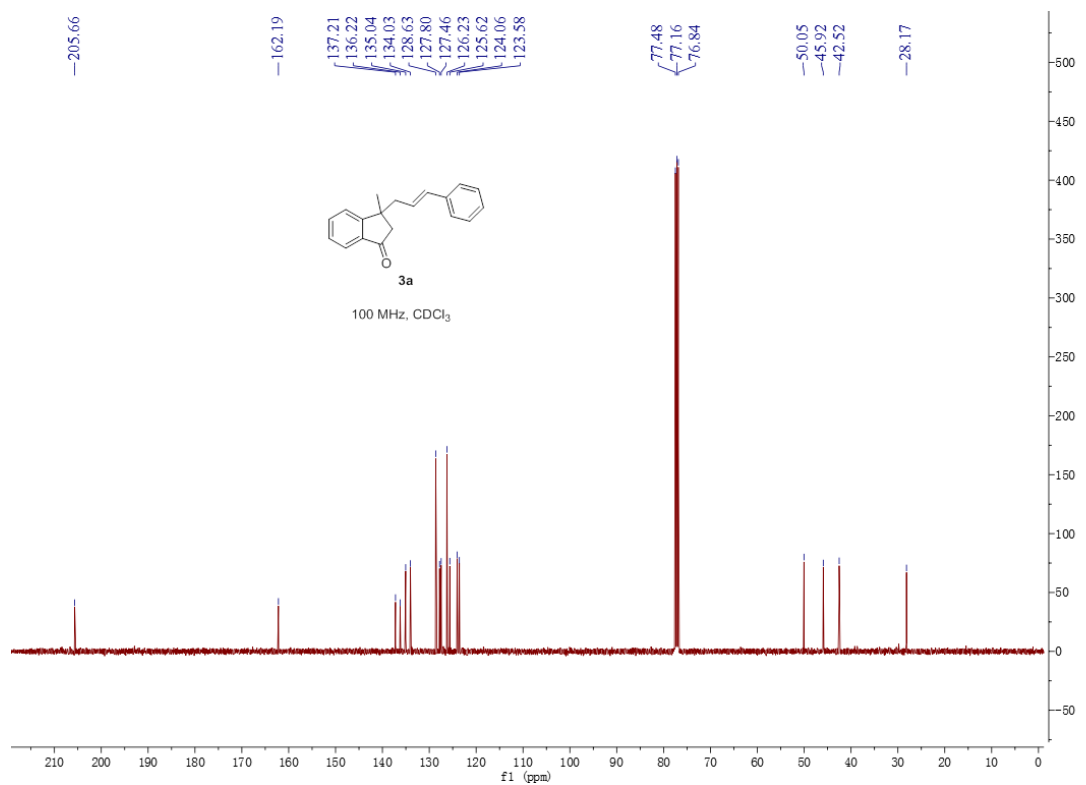

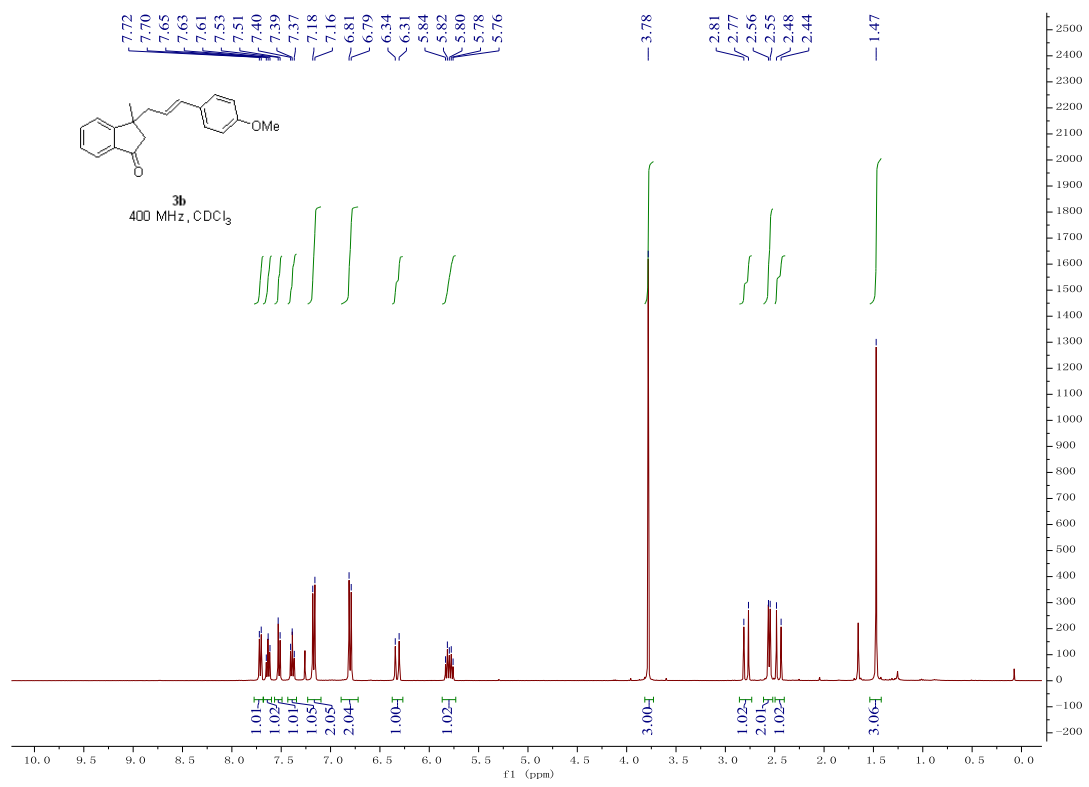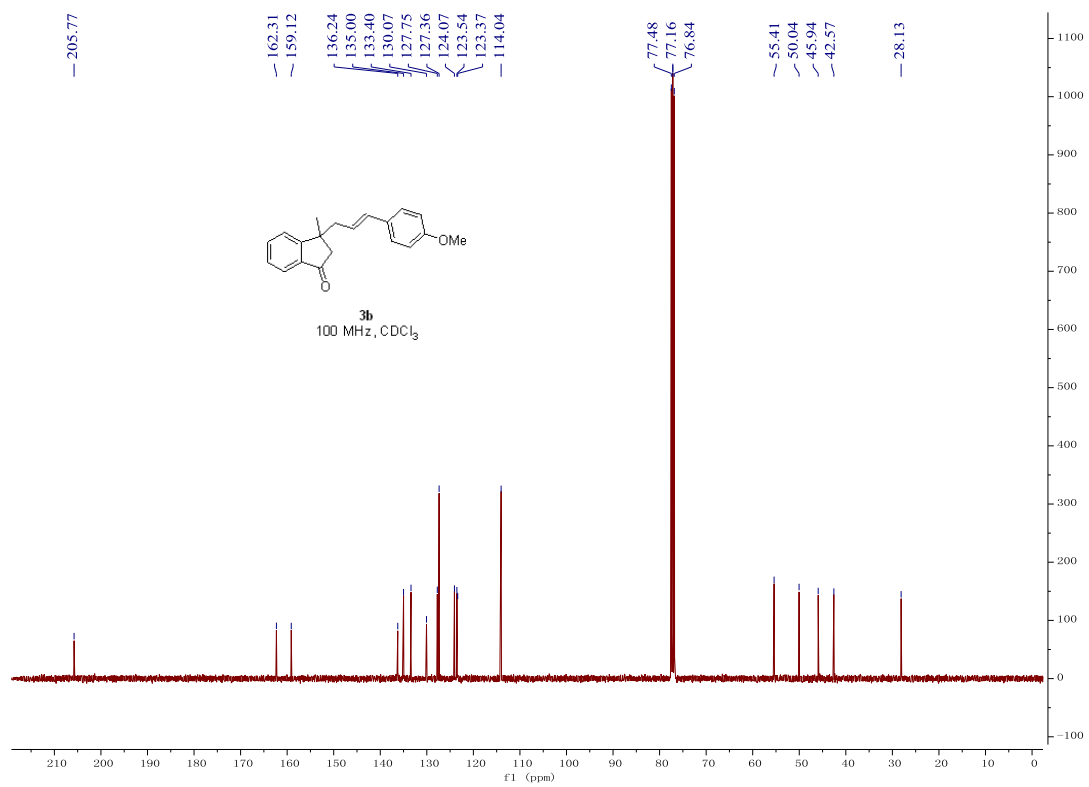

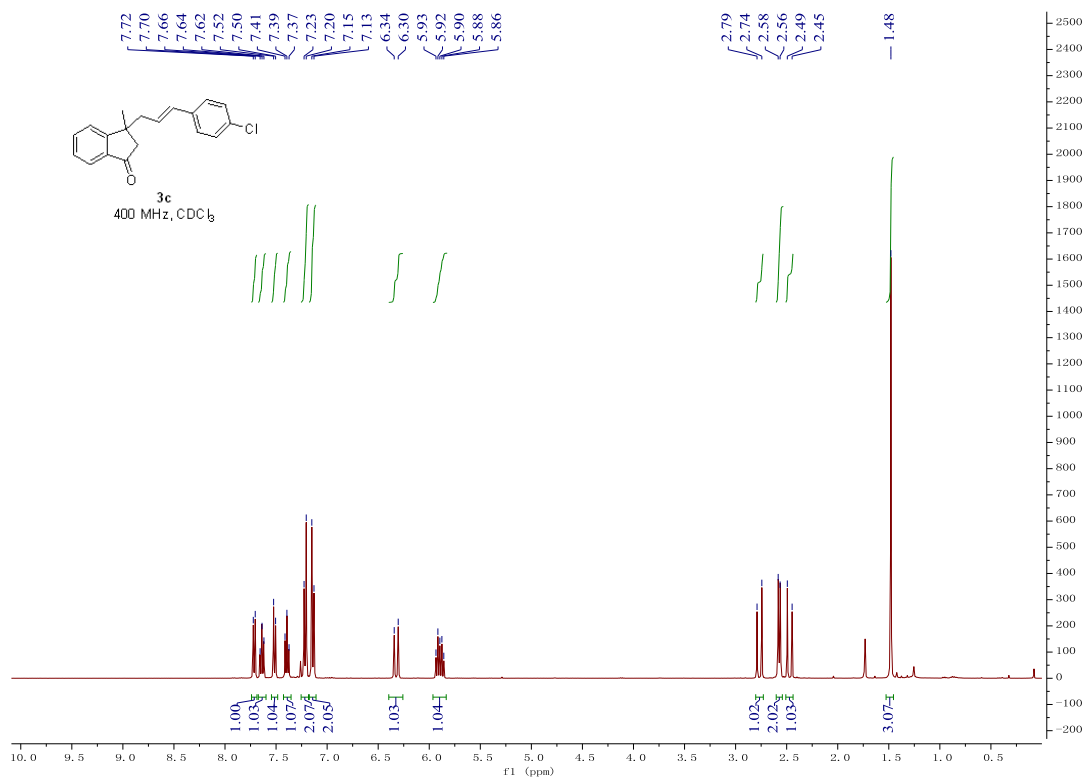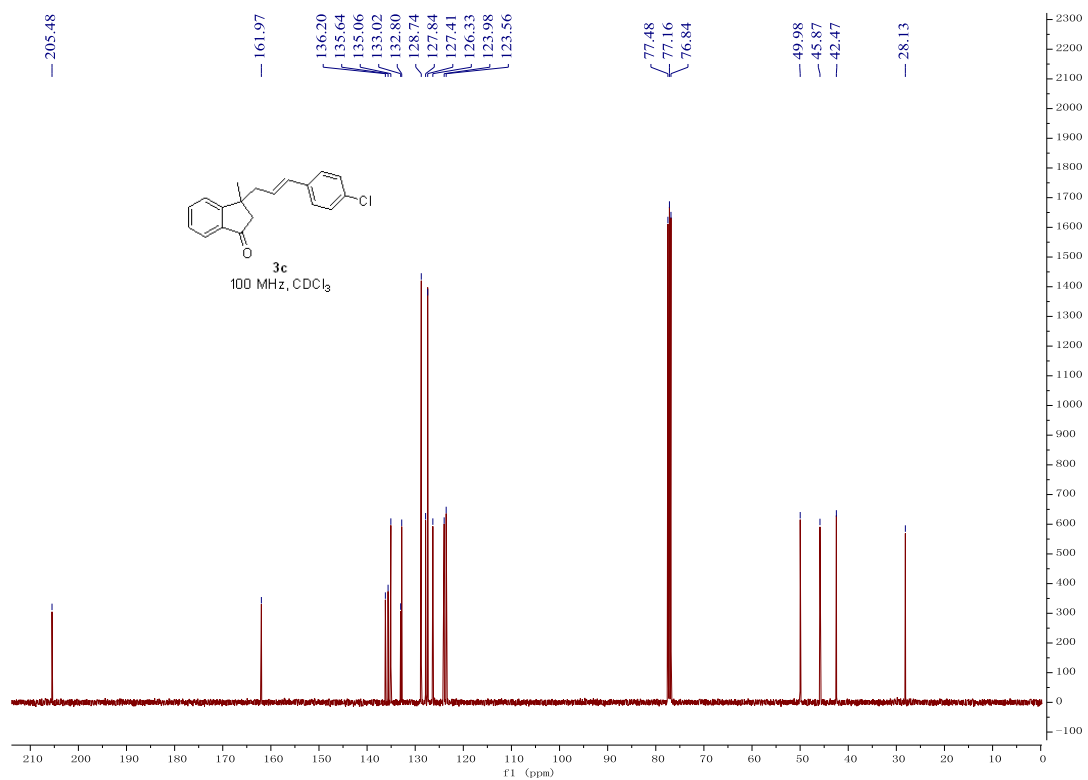



x1w-cj-458-g.1.f1d  
PROTON CDCl3 D:\2022

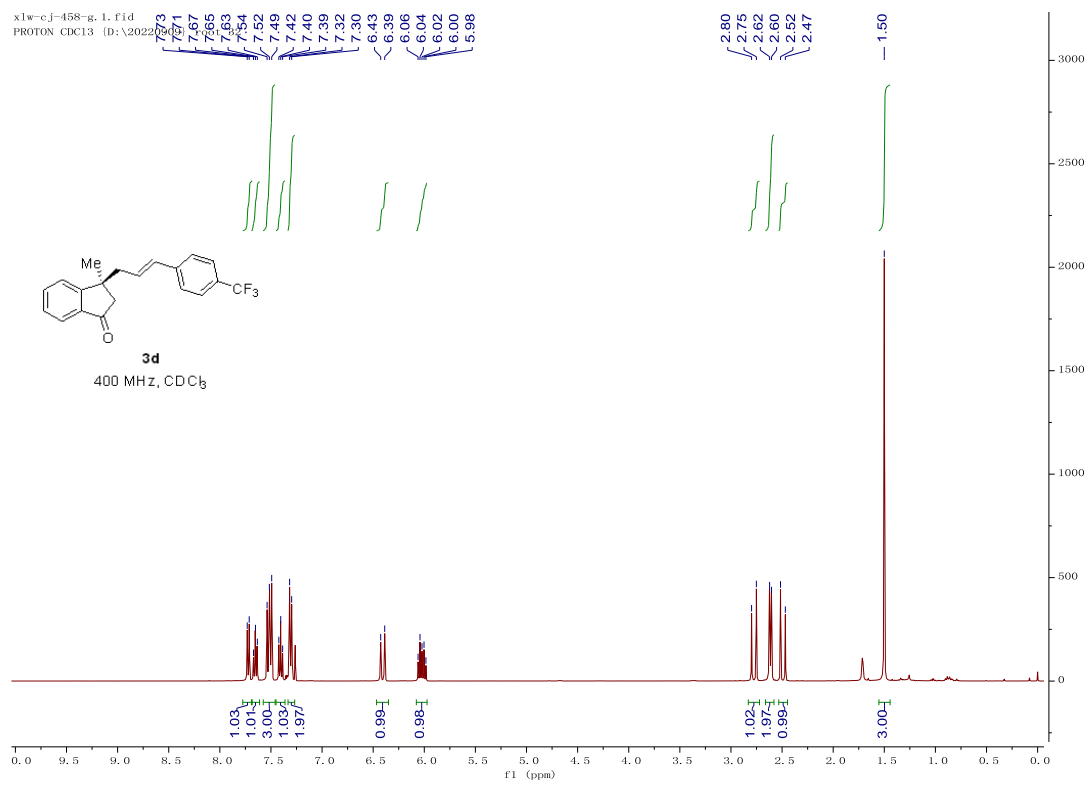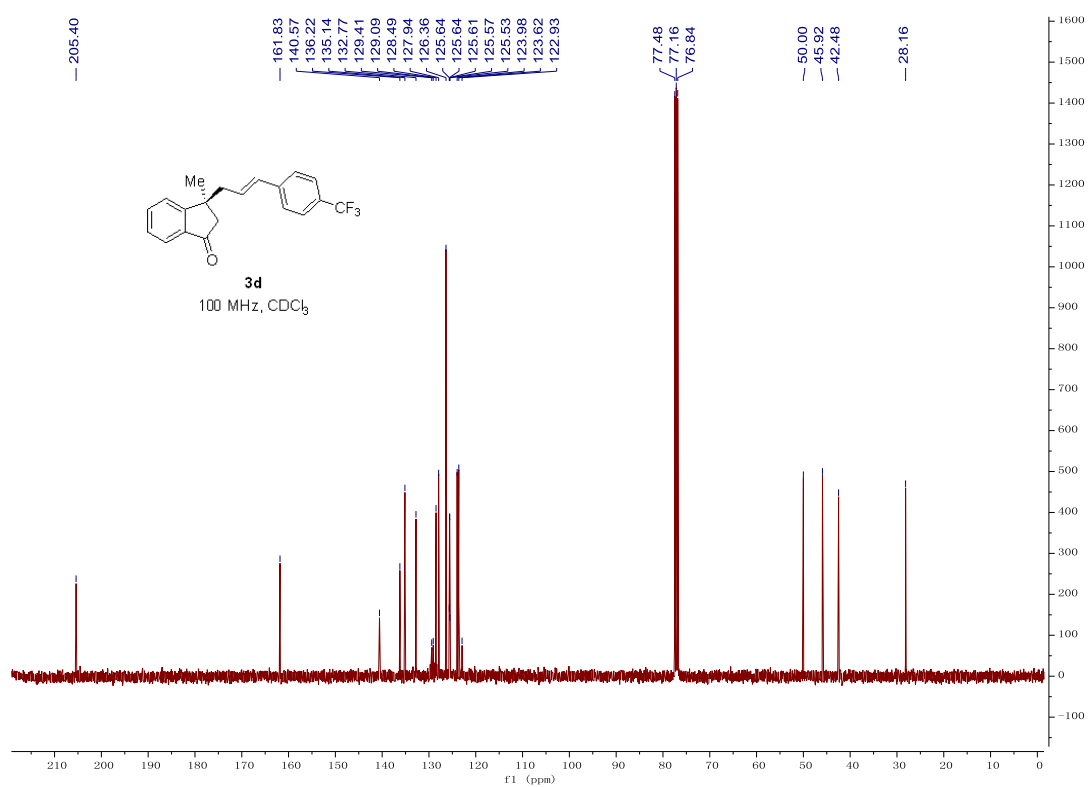

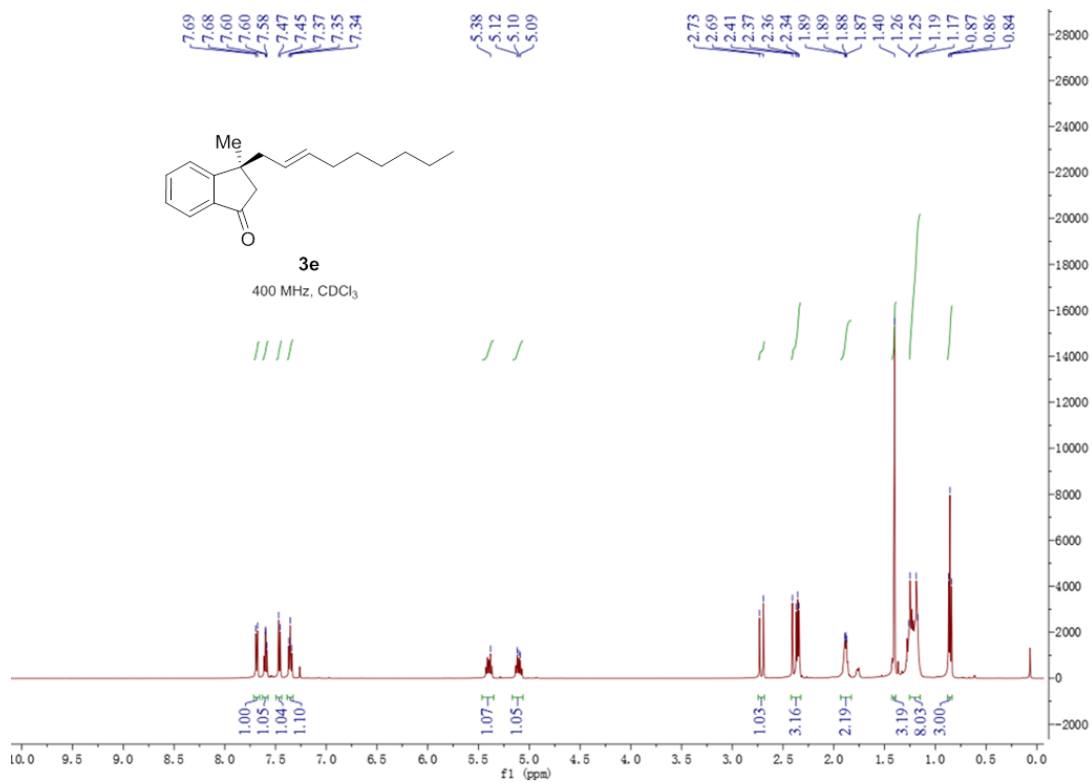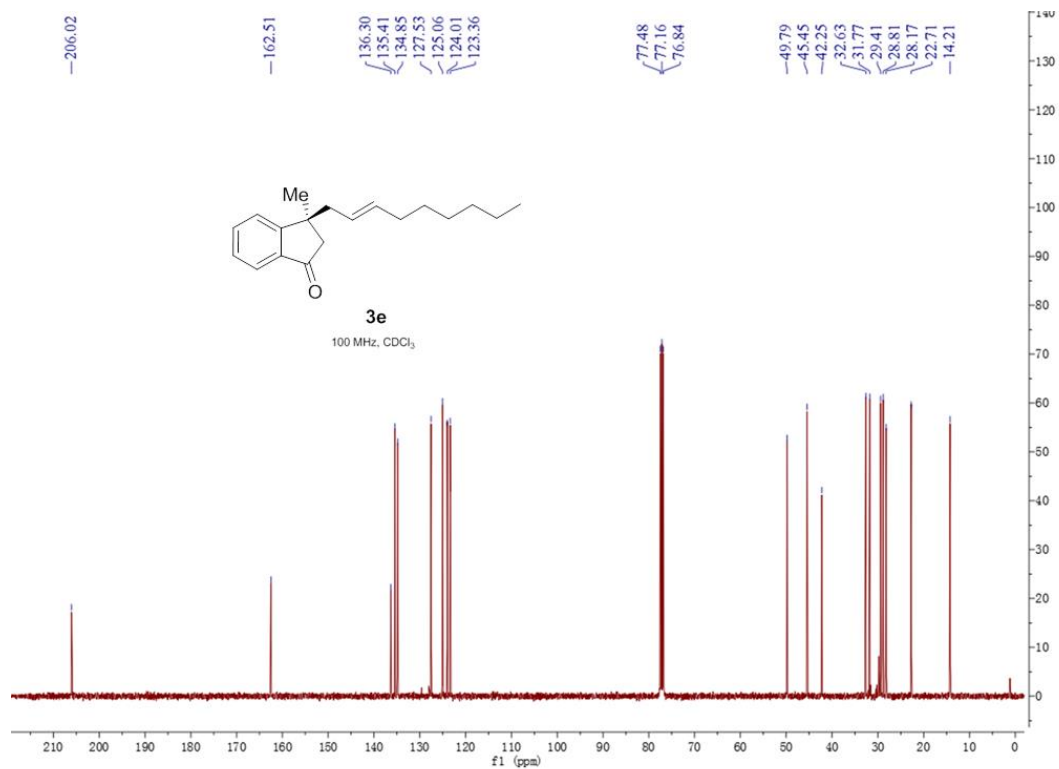

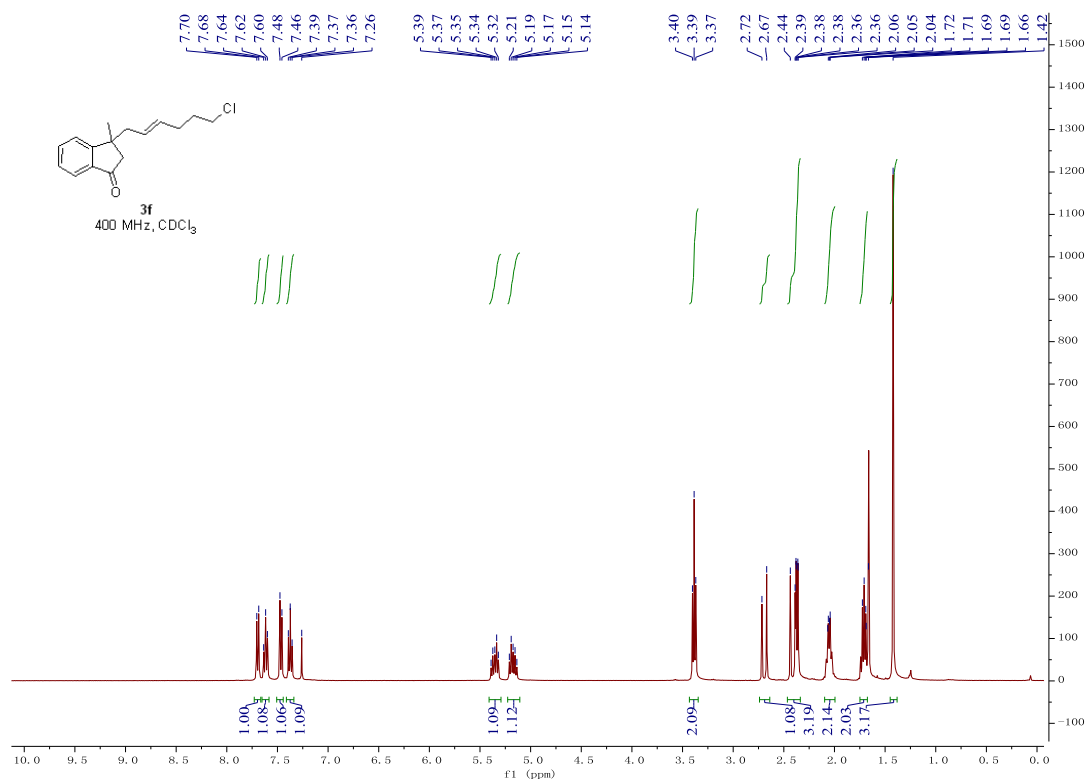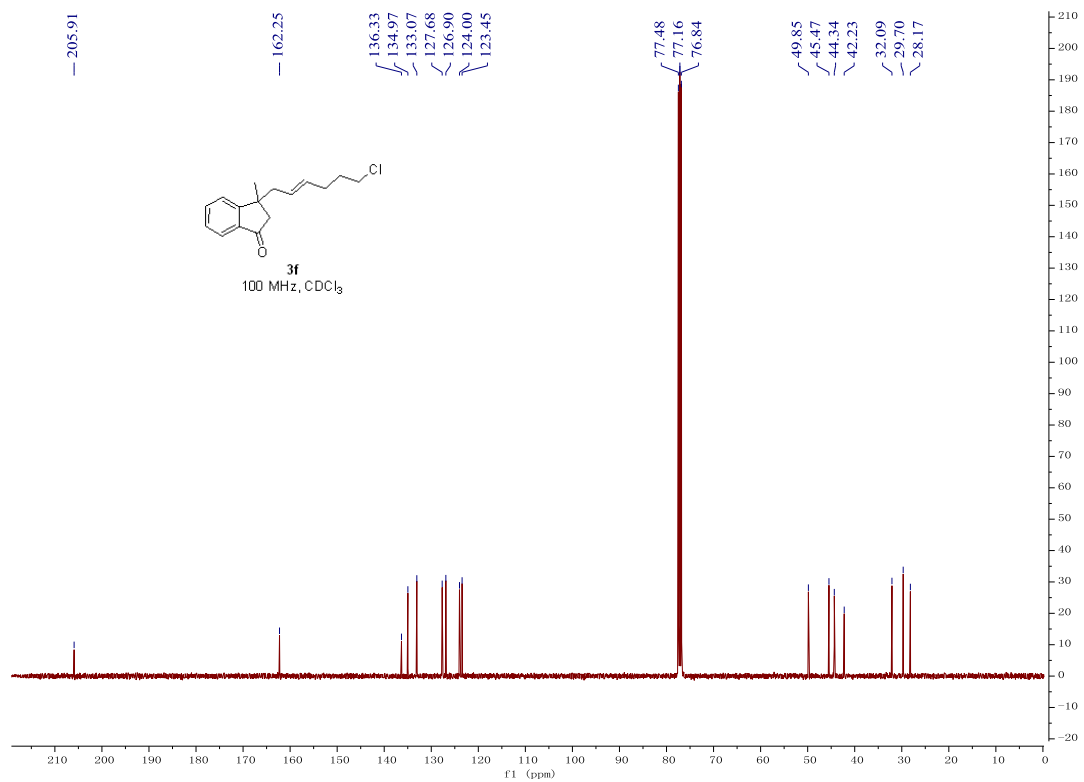

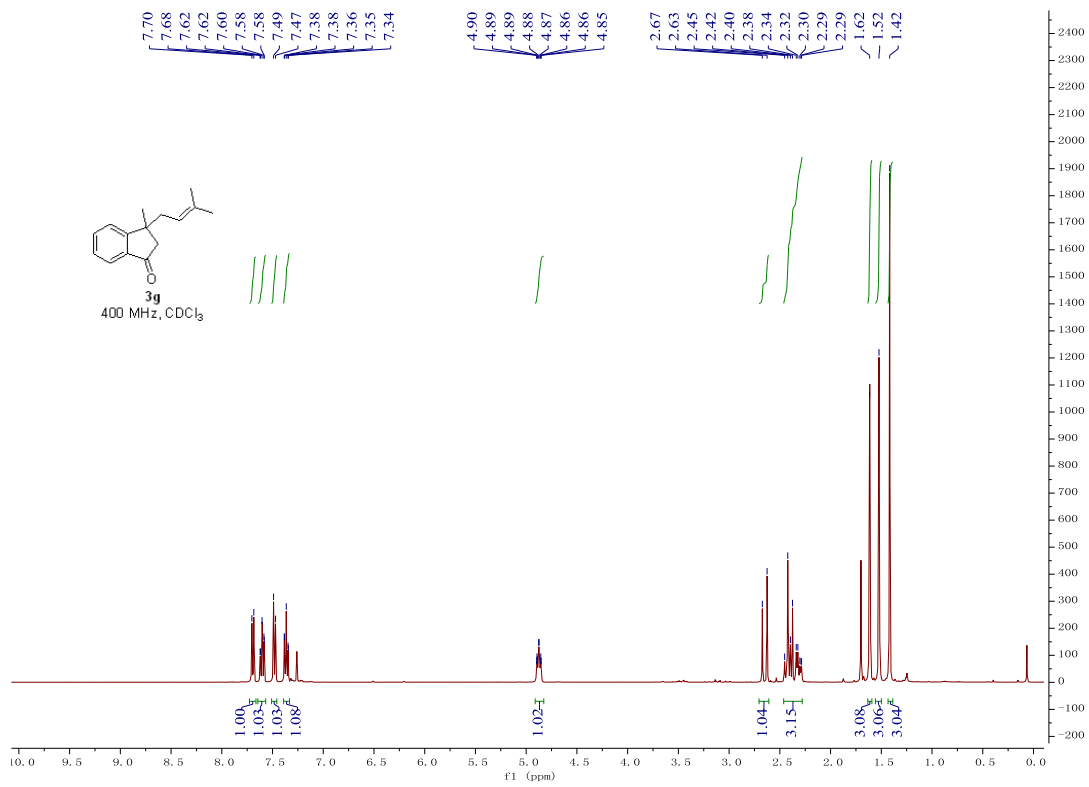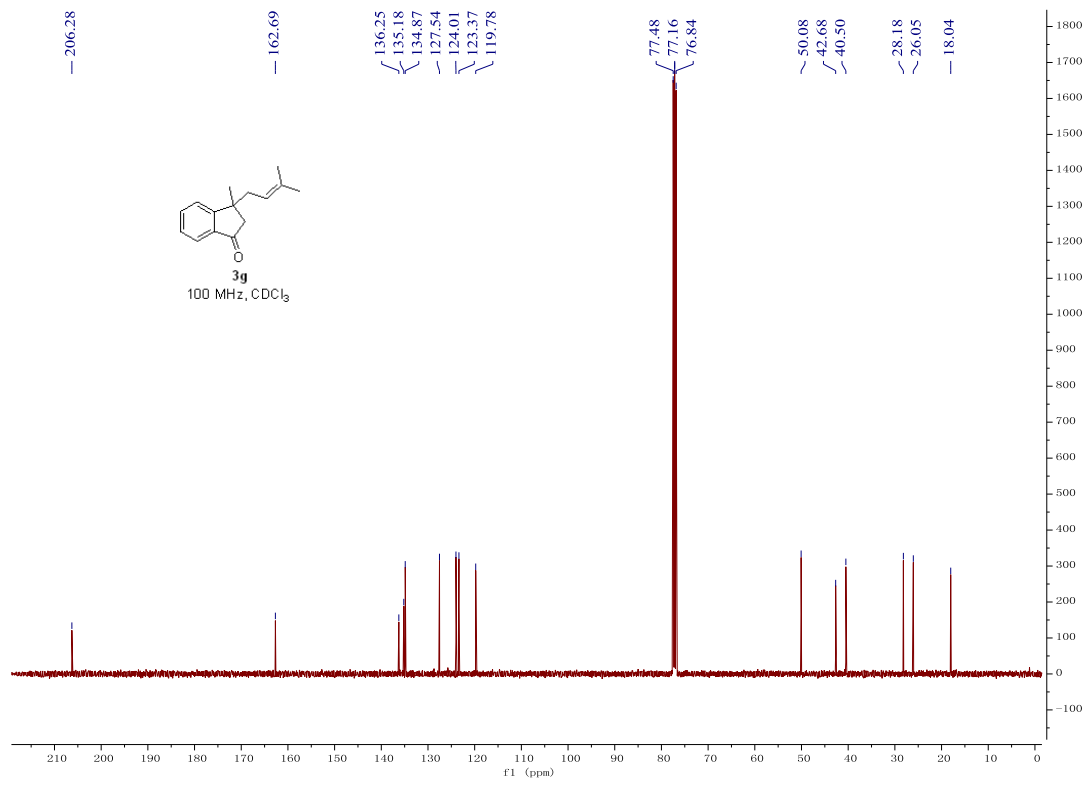

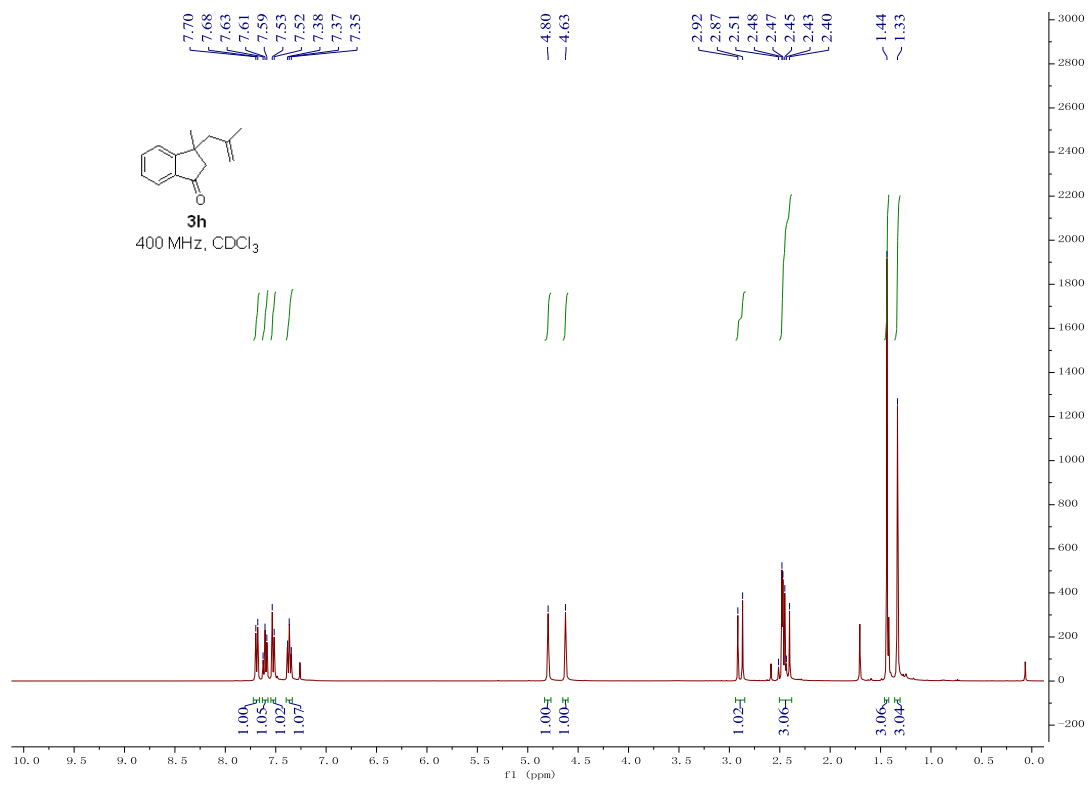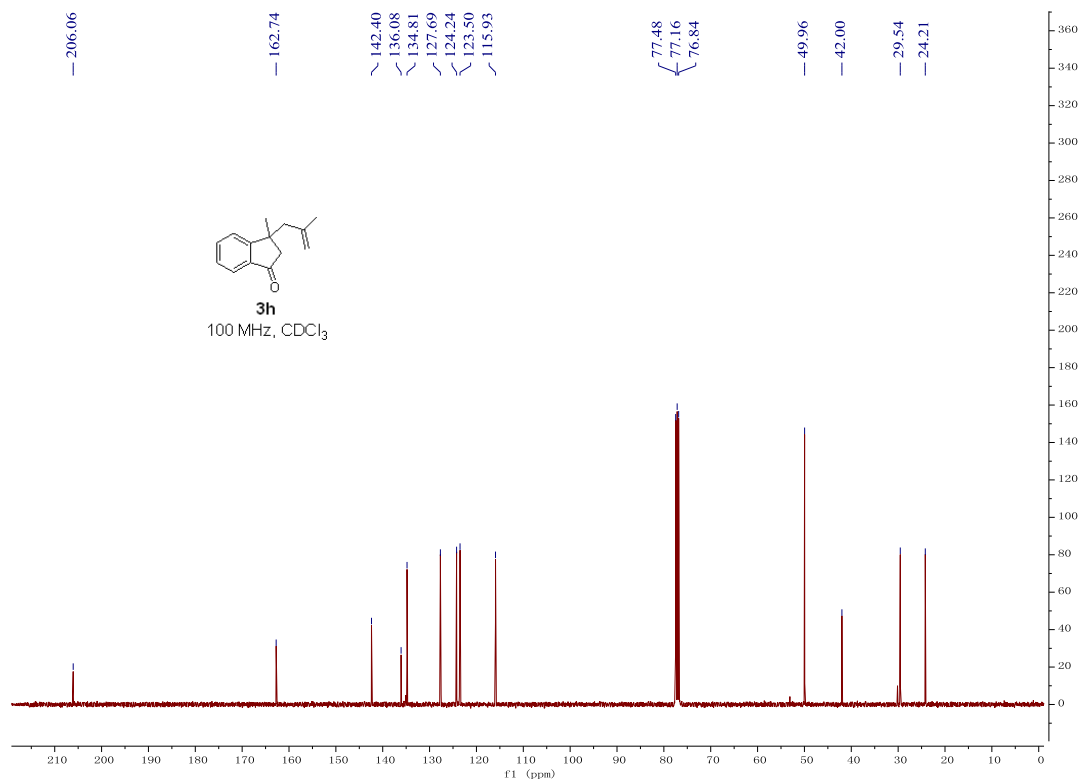

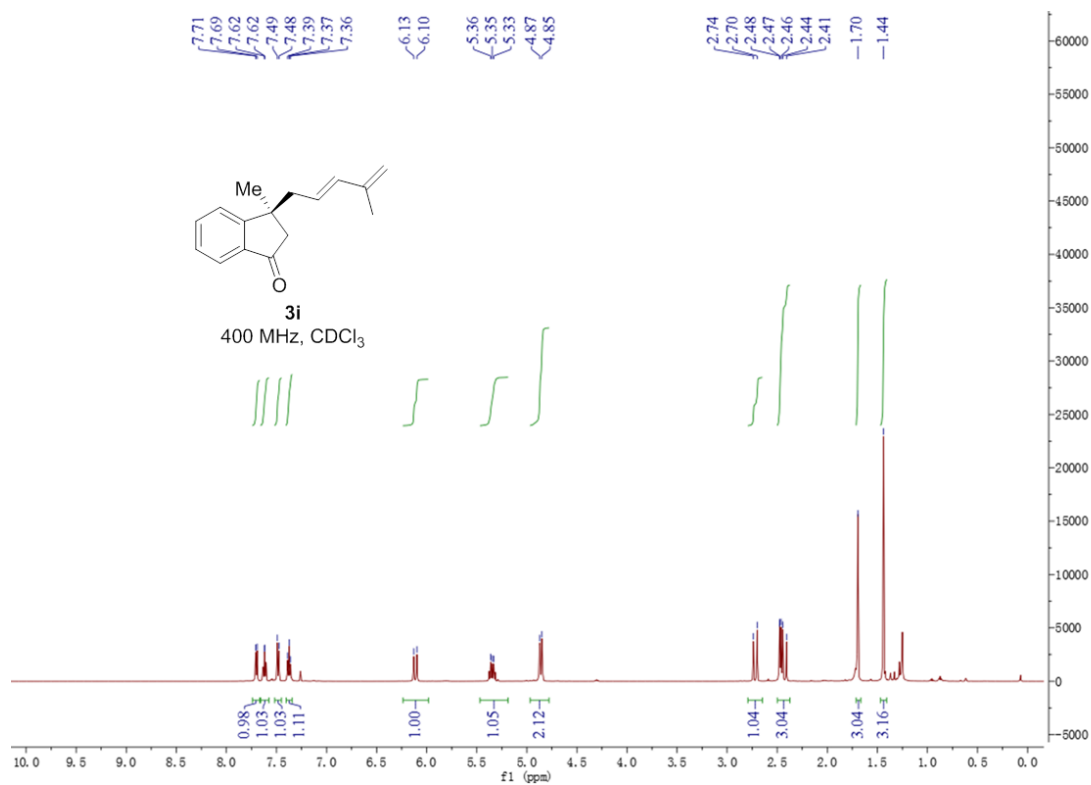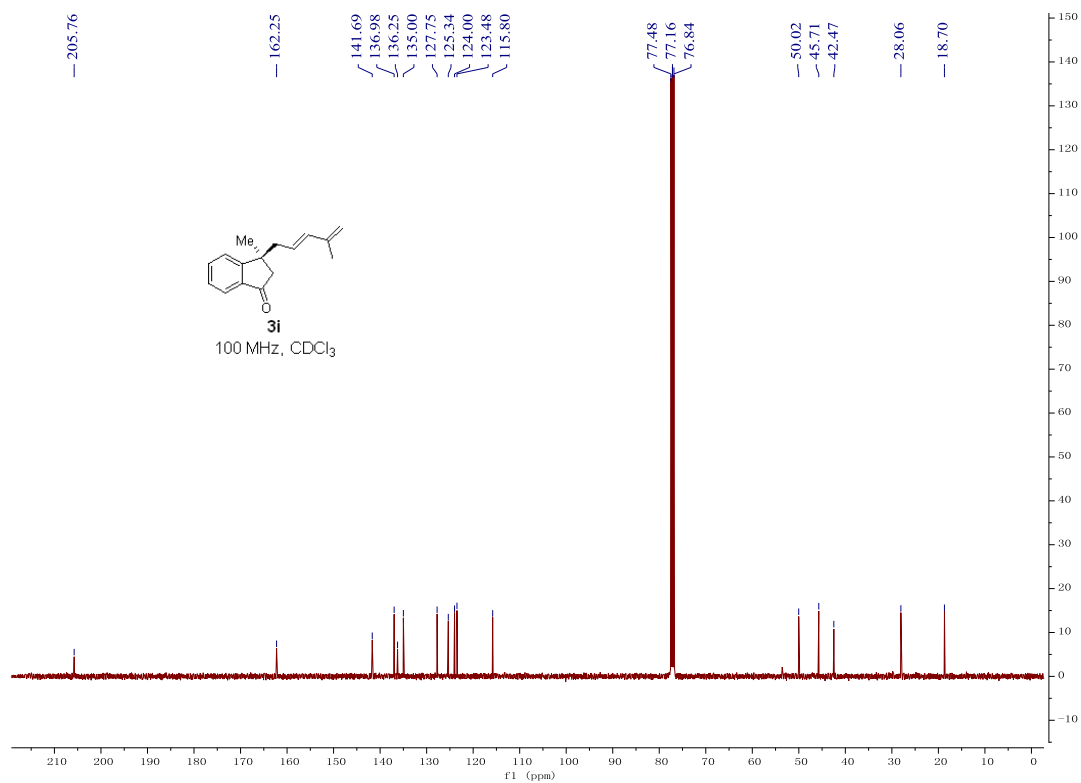

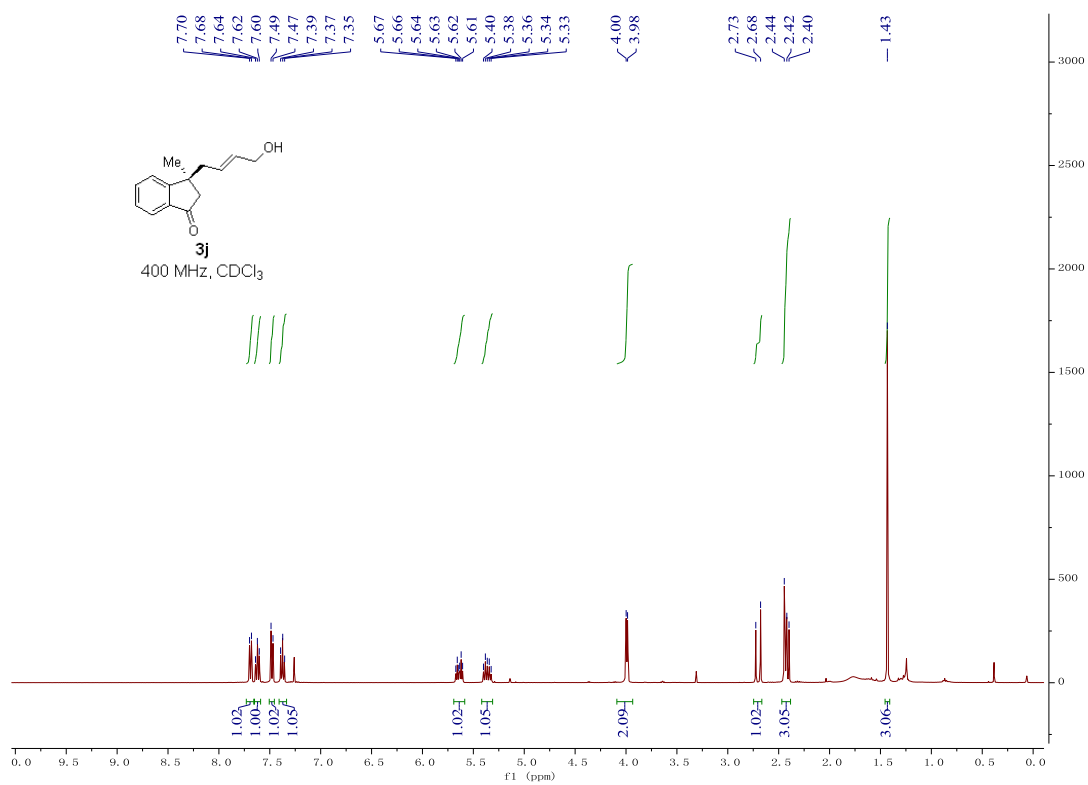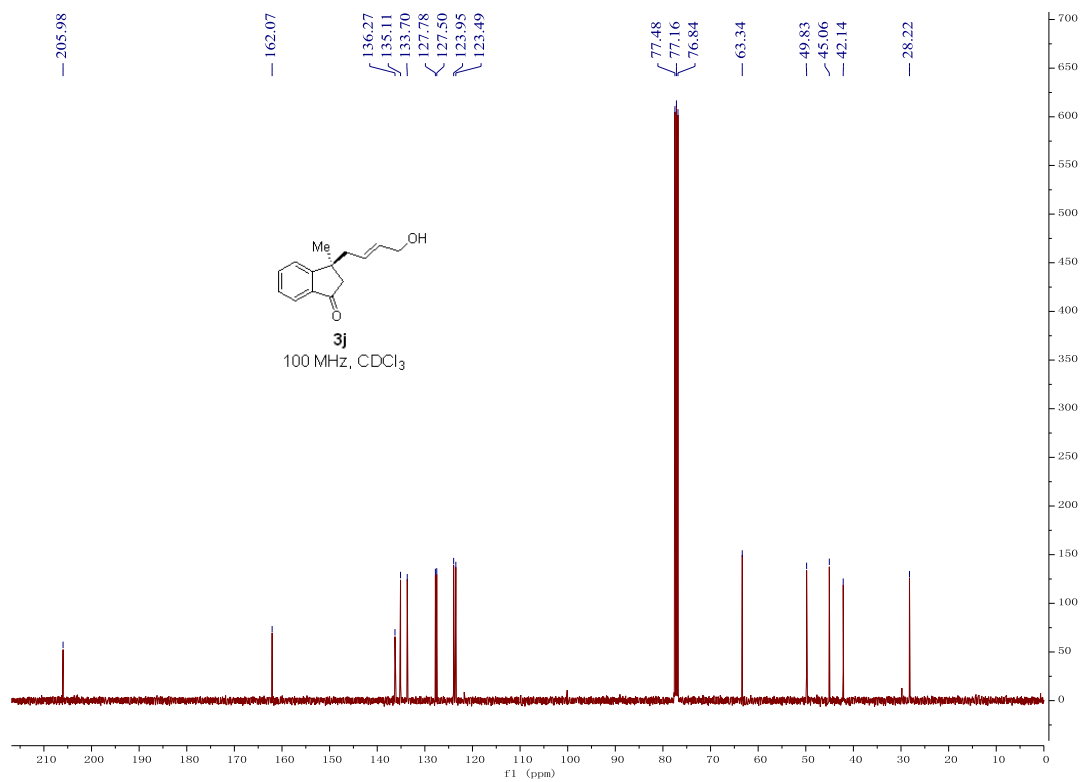

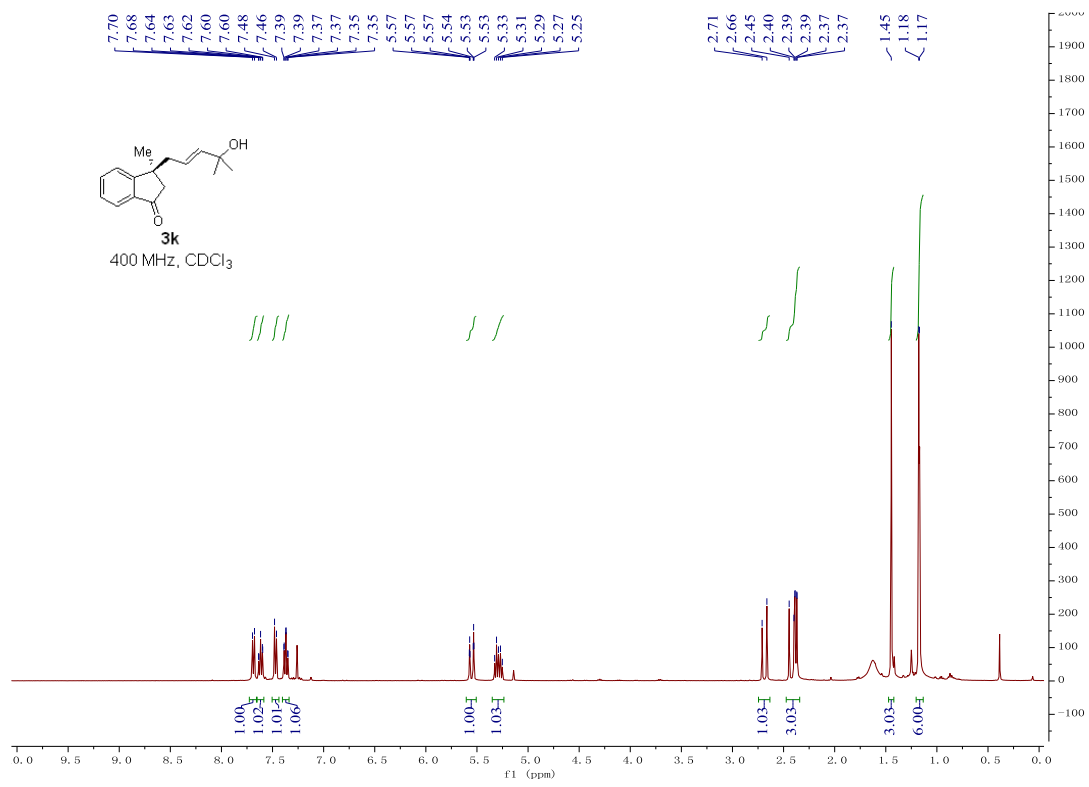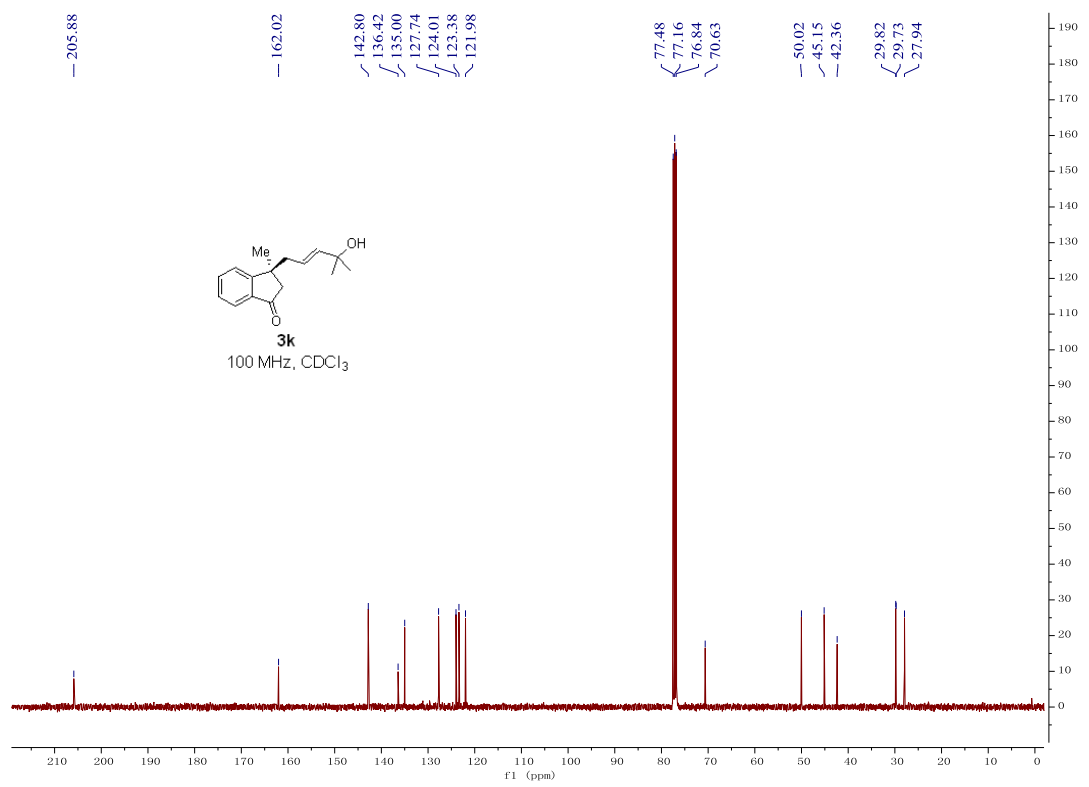



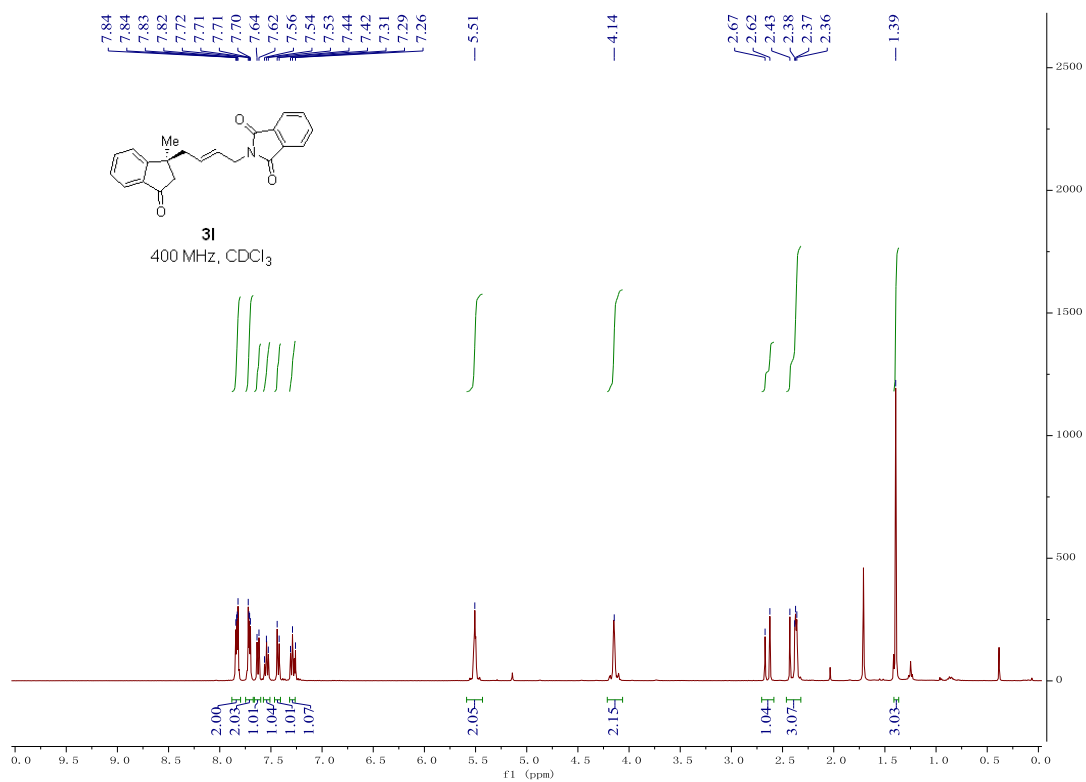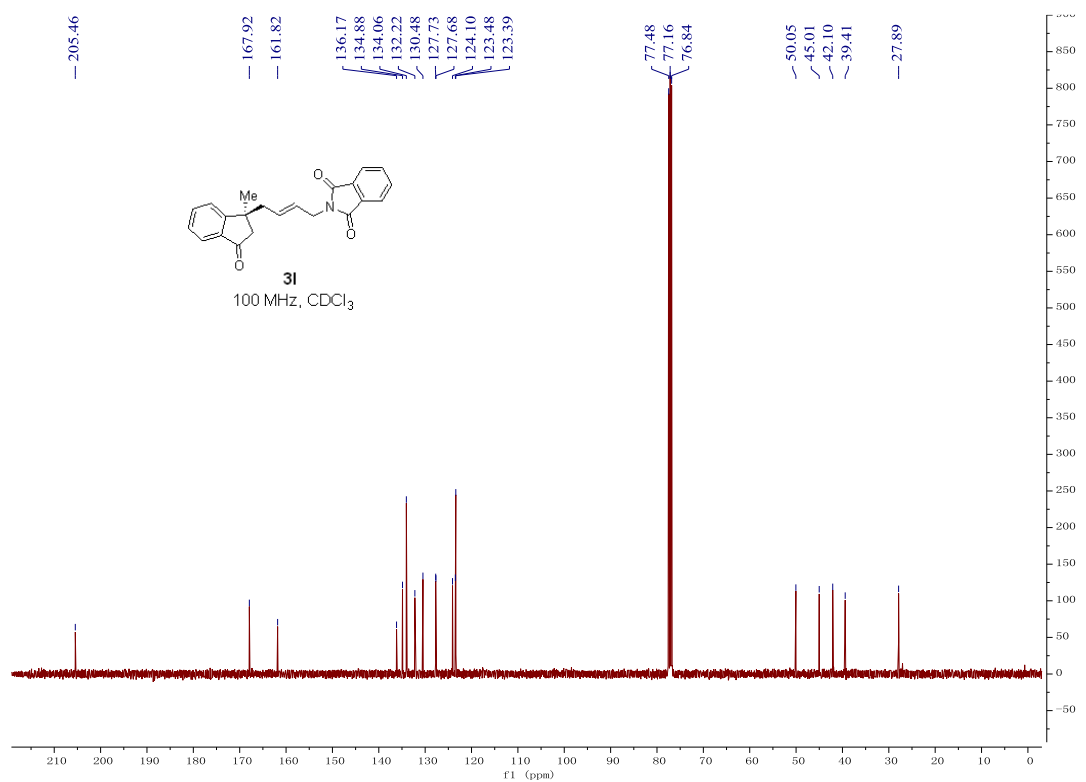

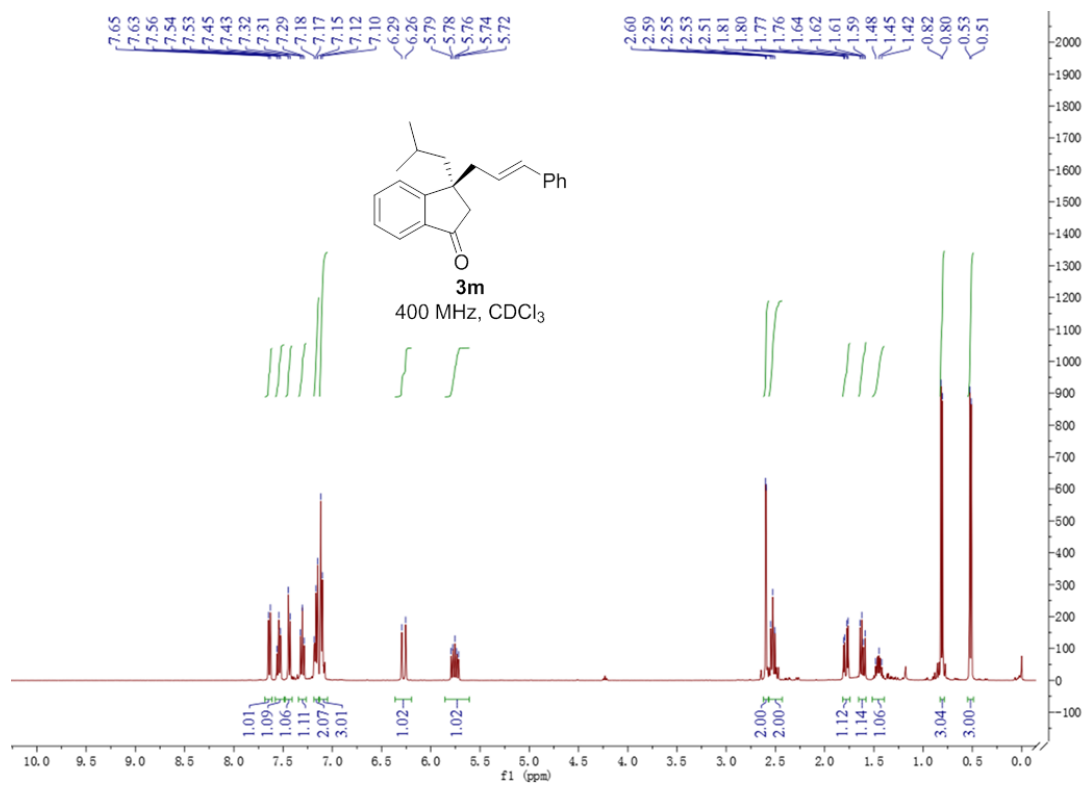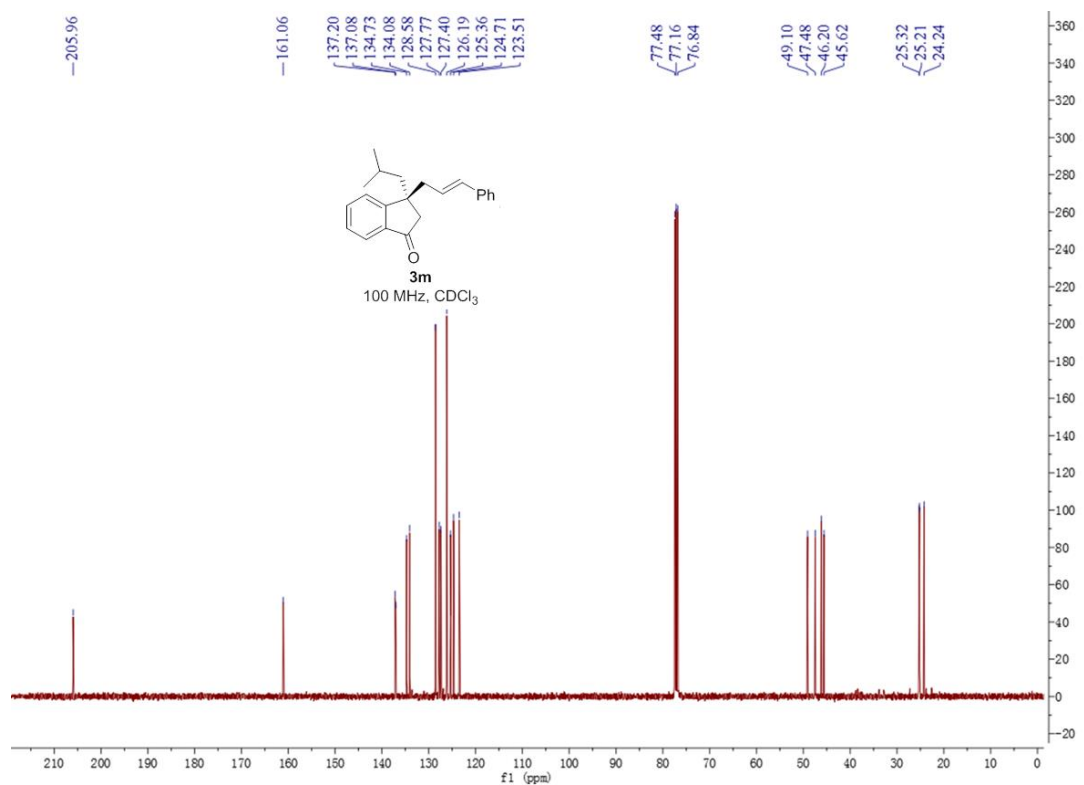

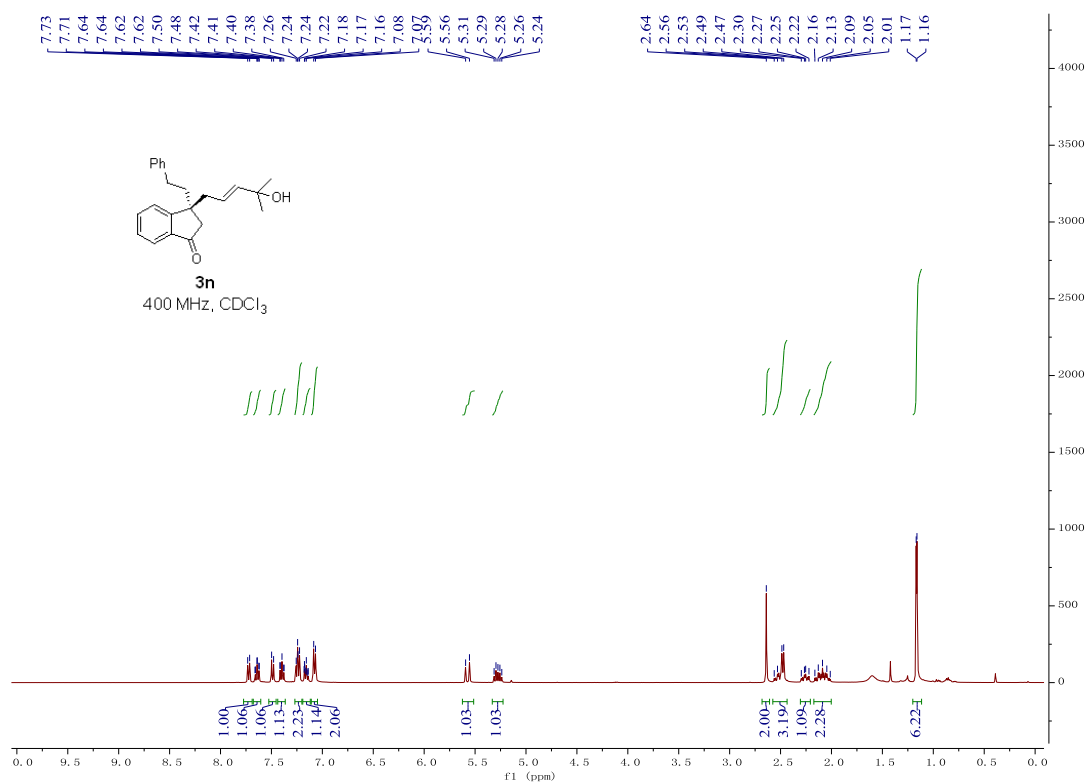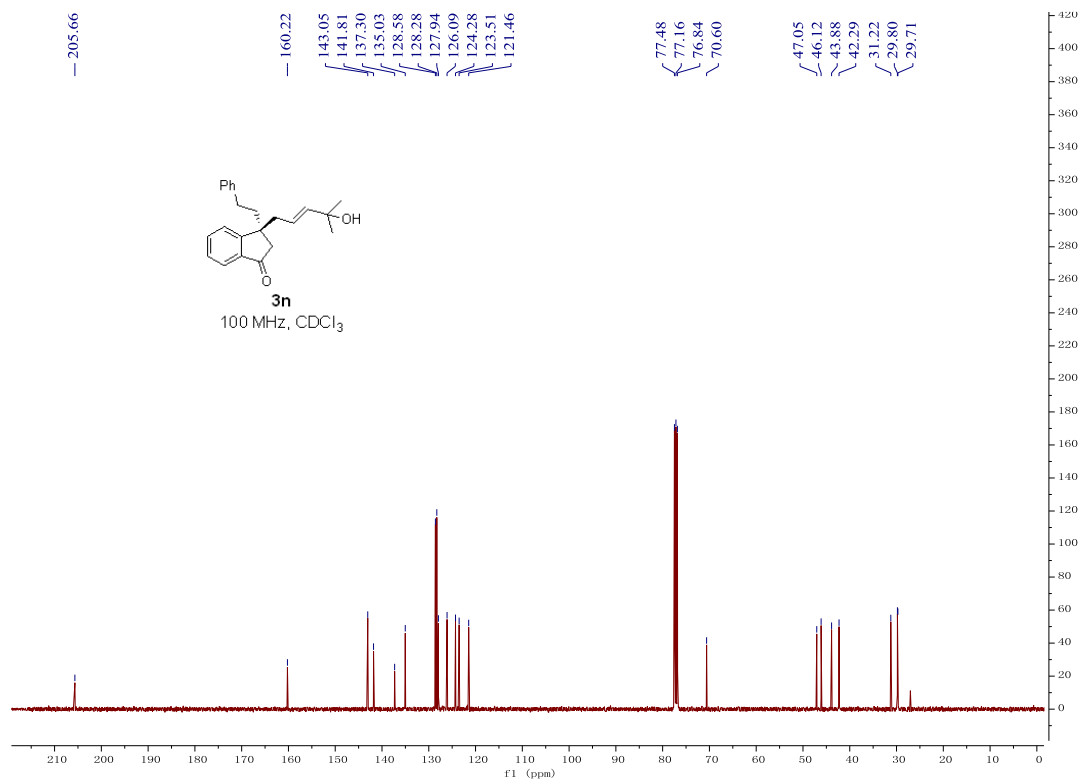

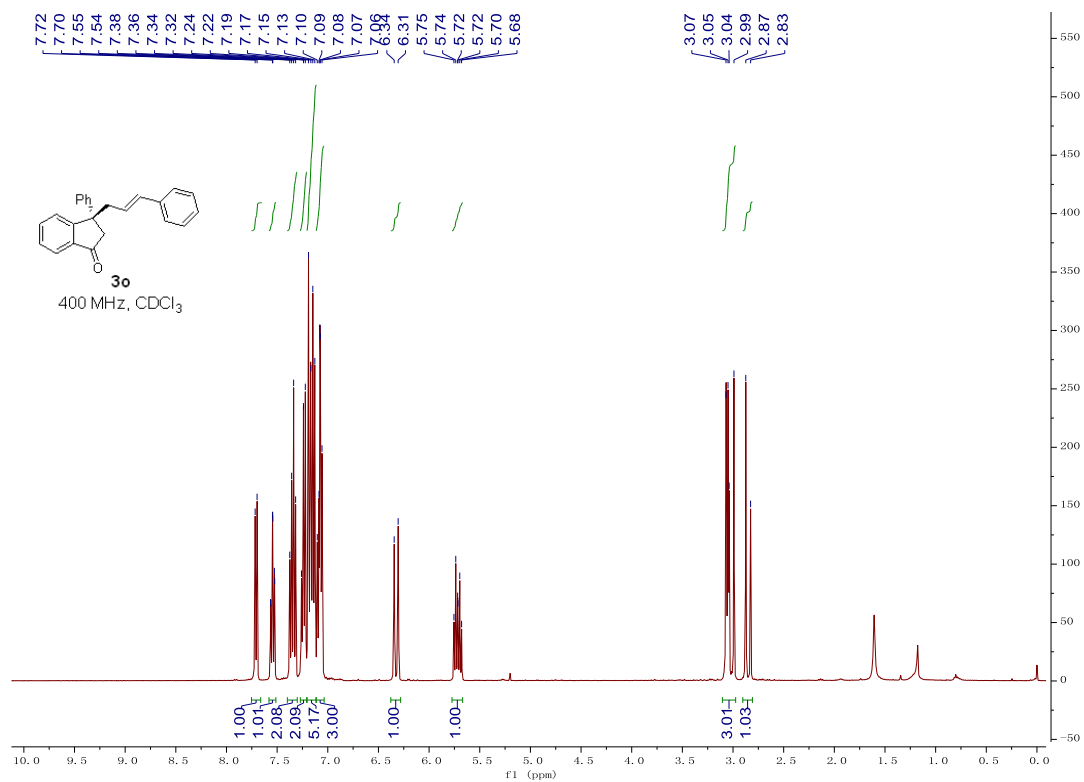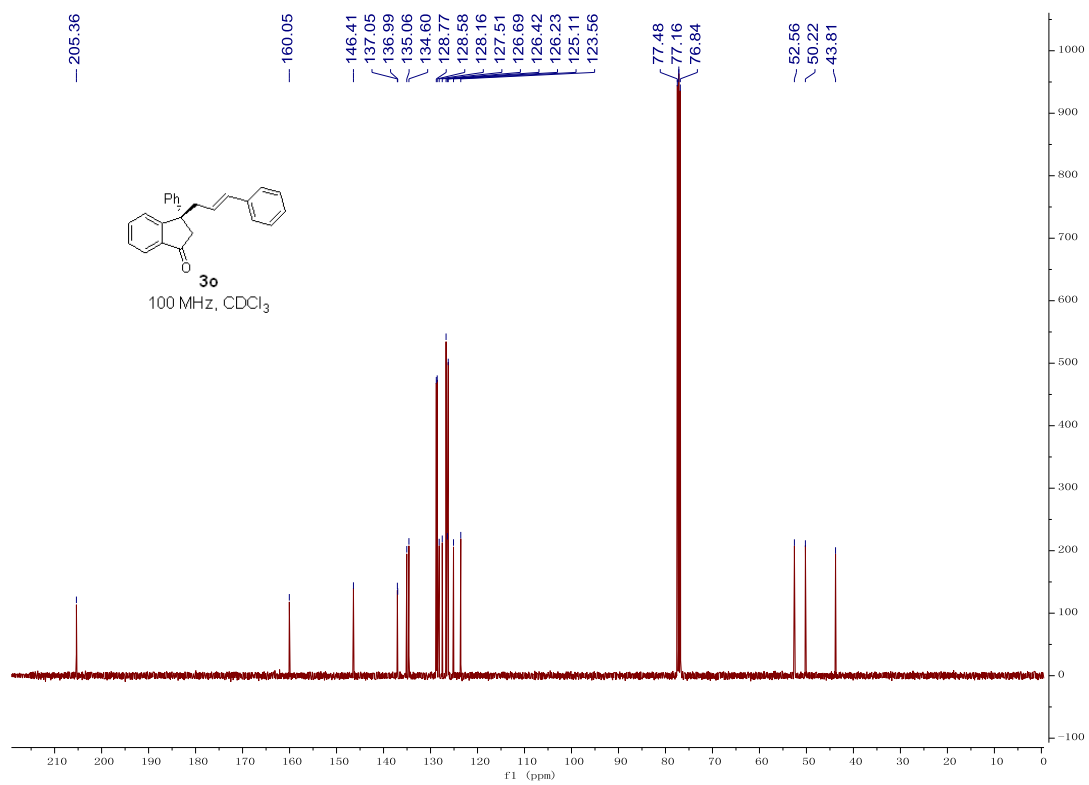

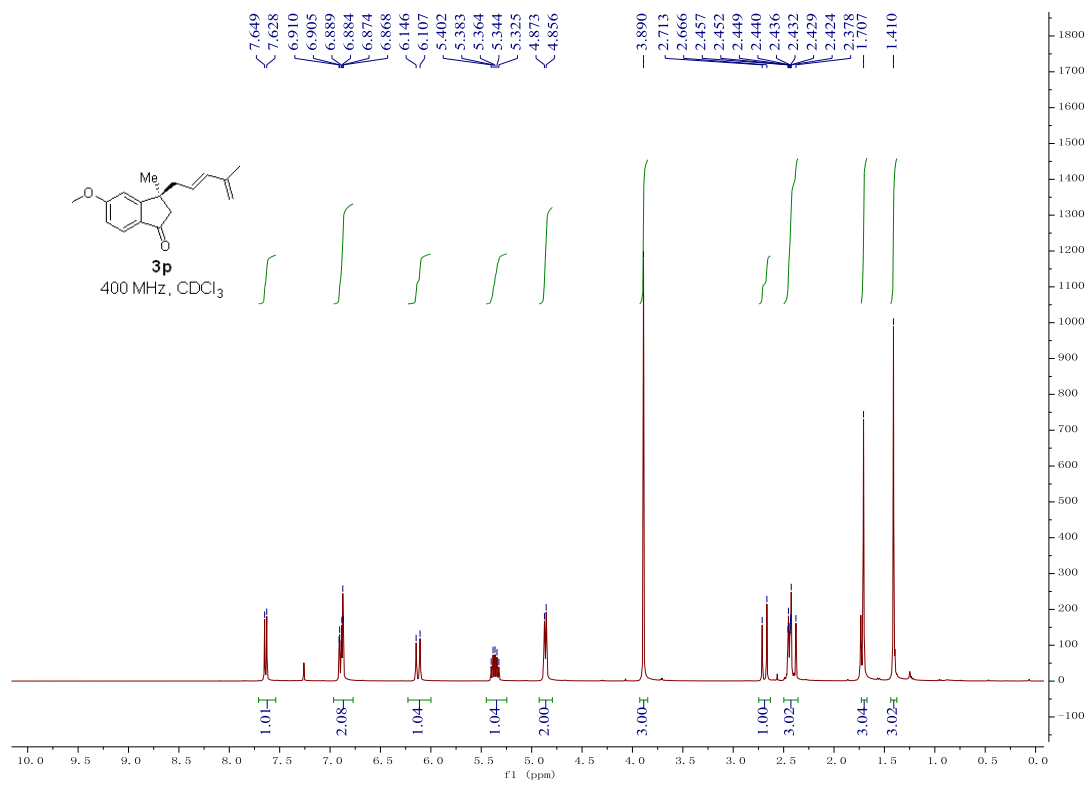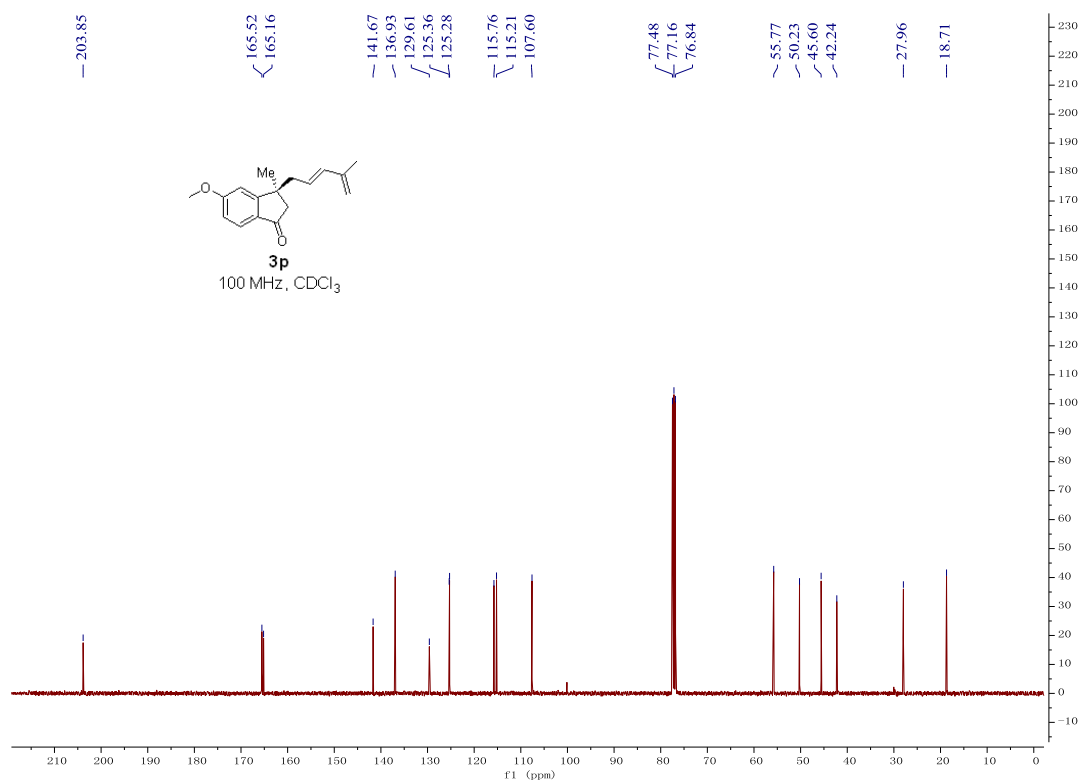

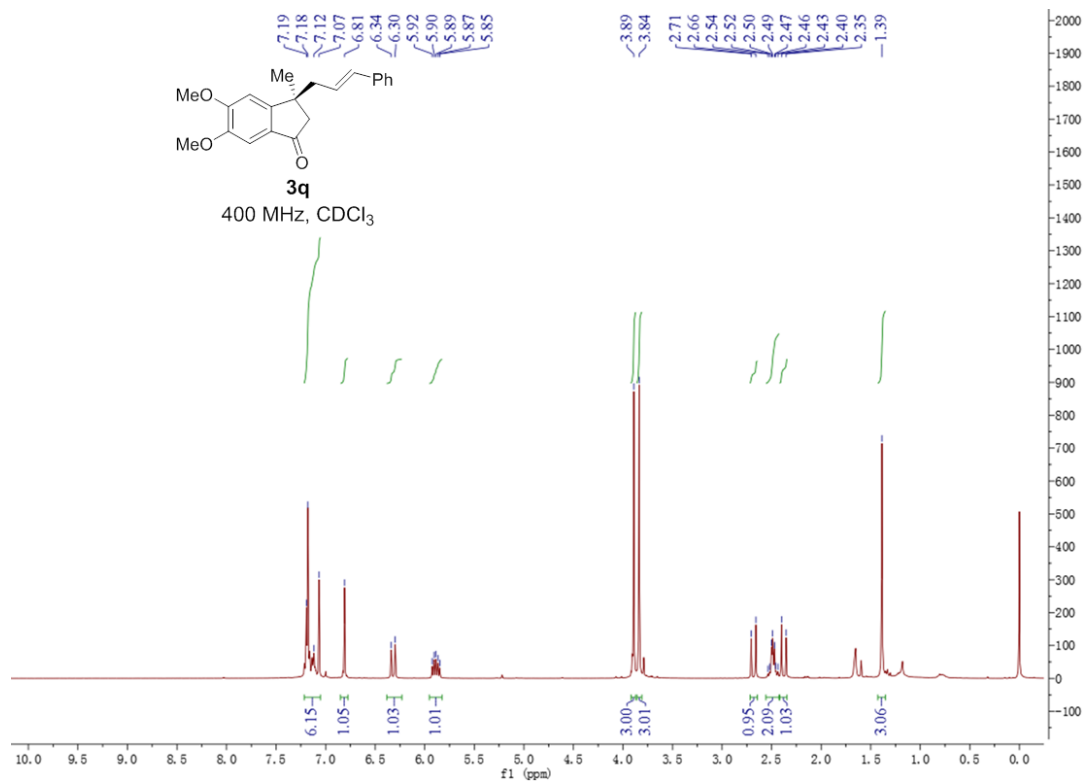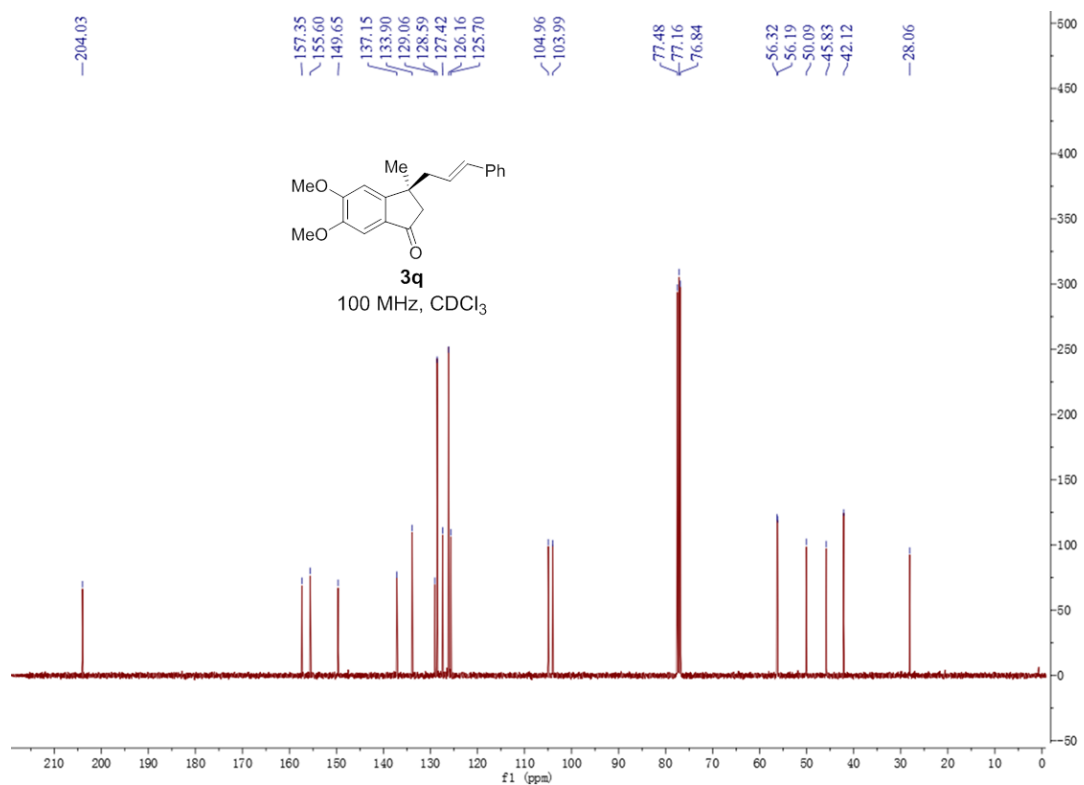

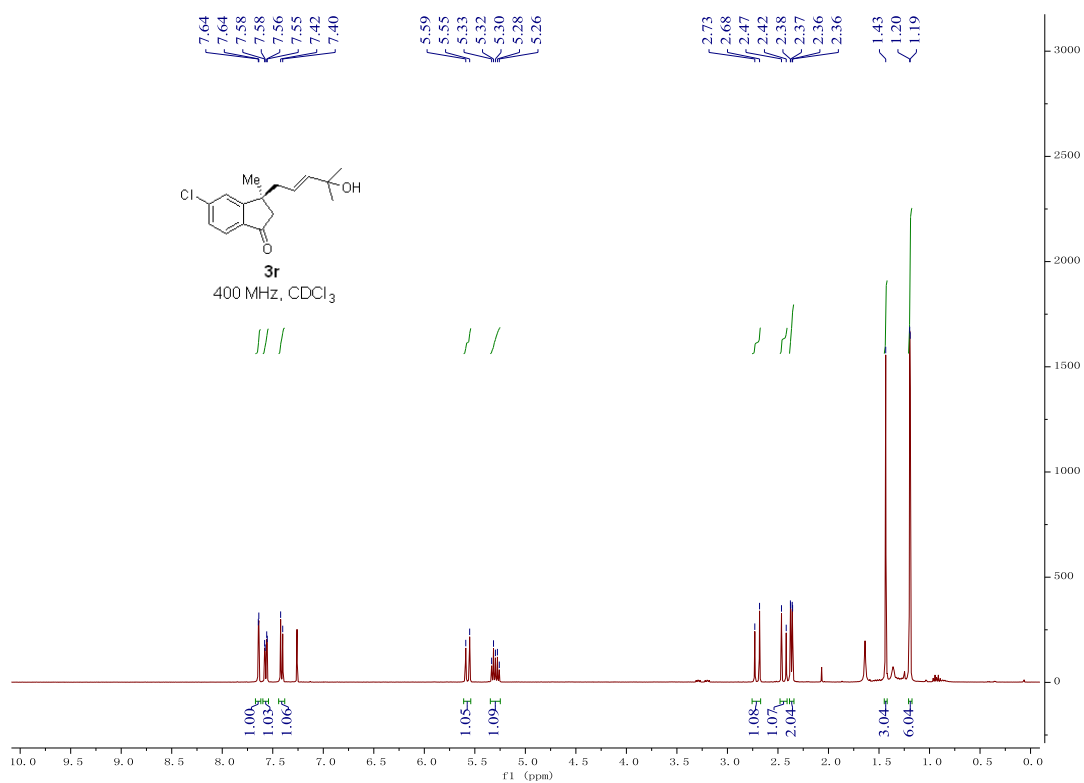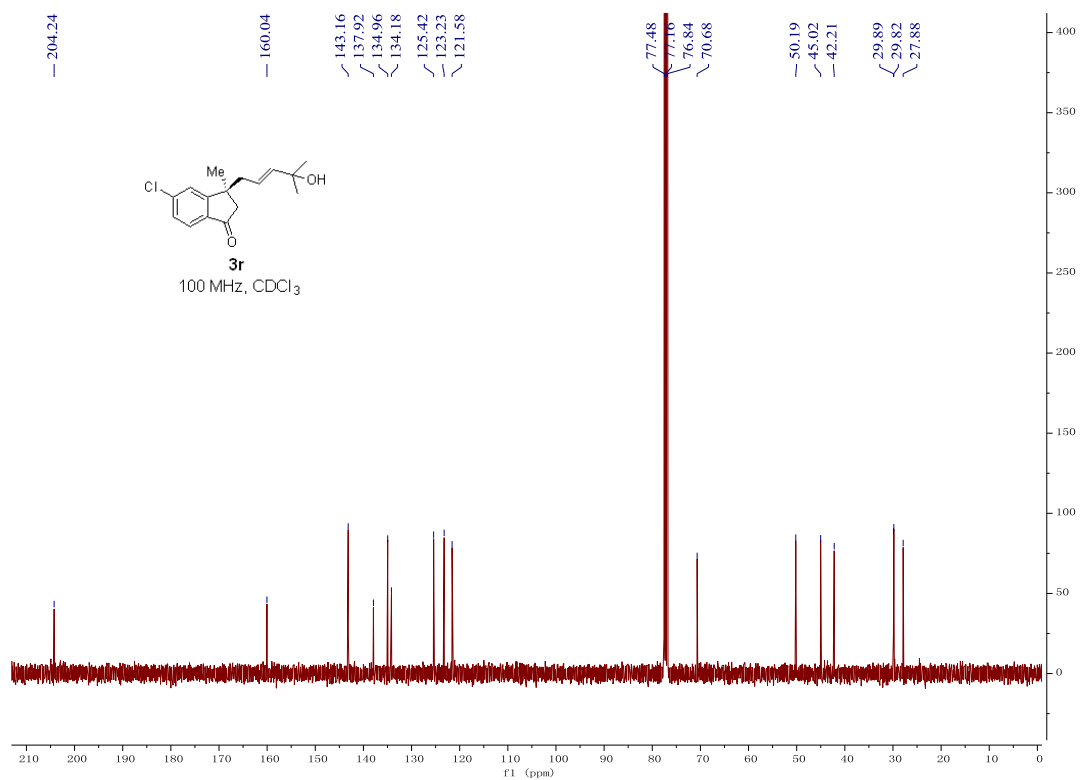

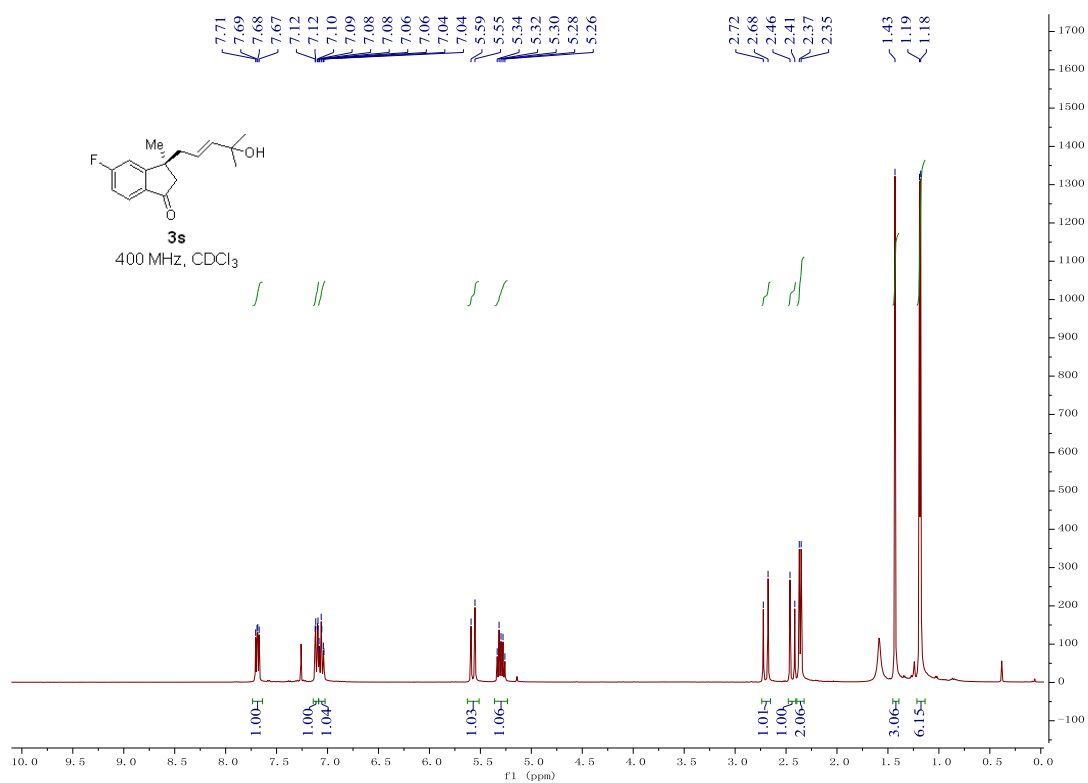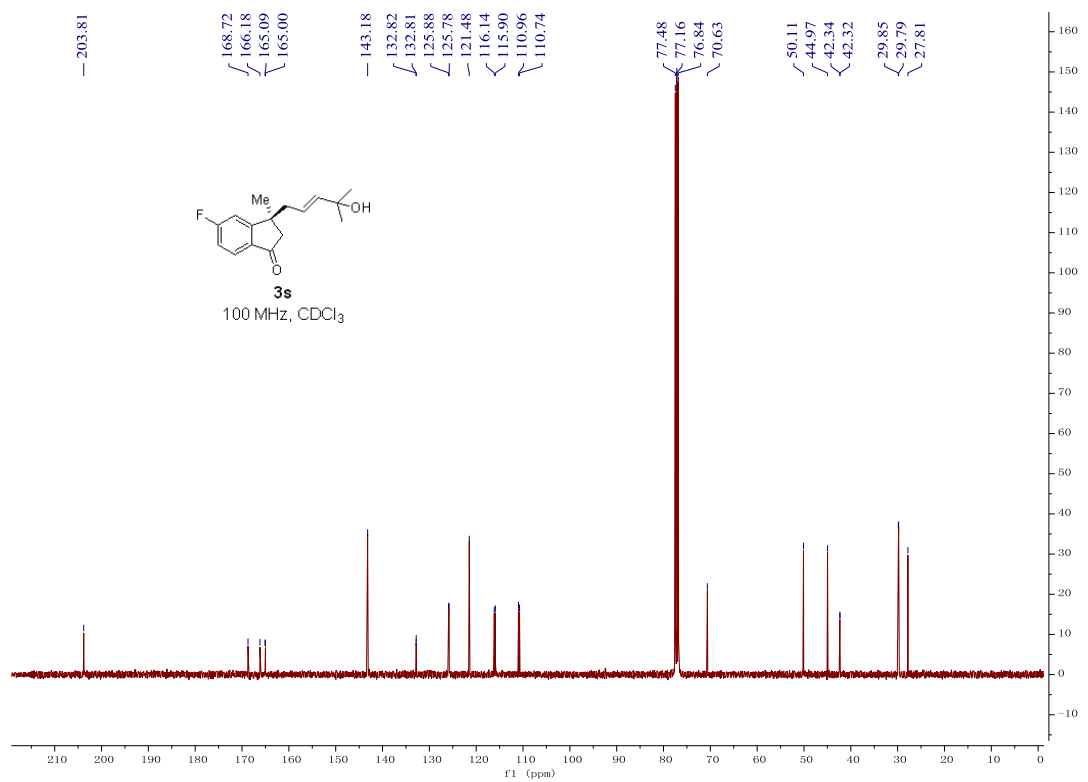



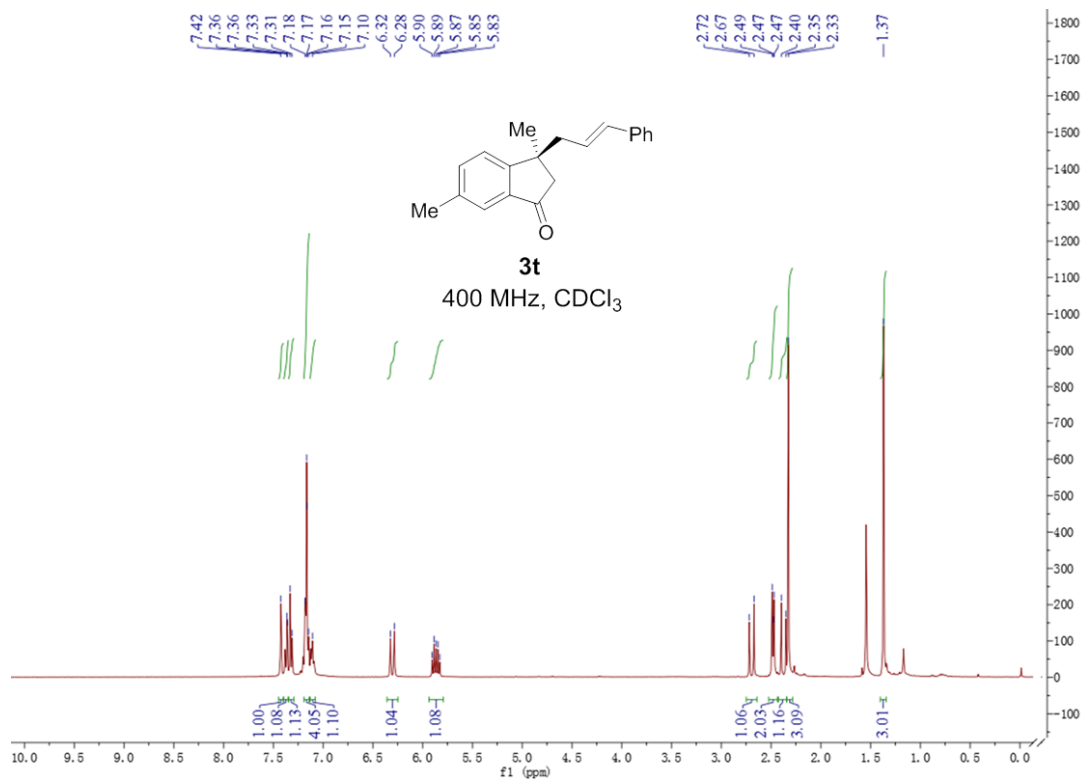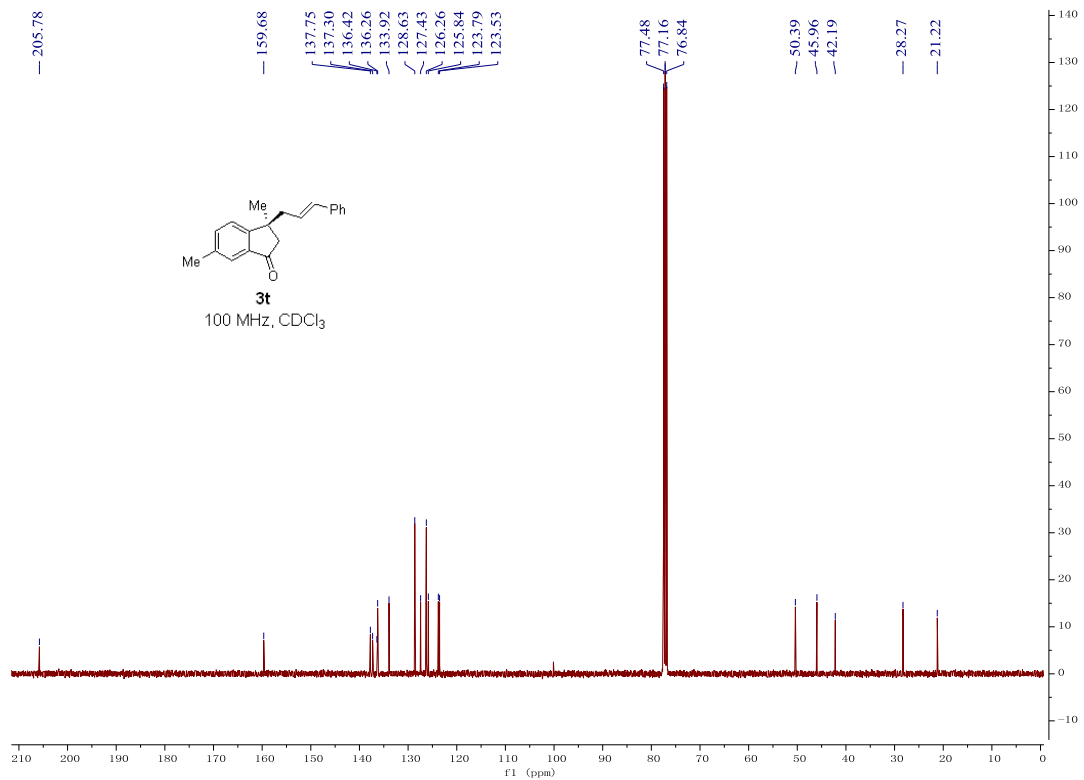

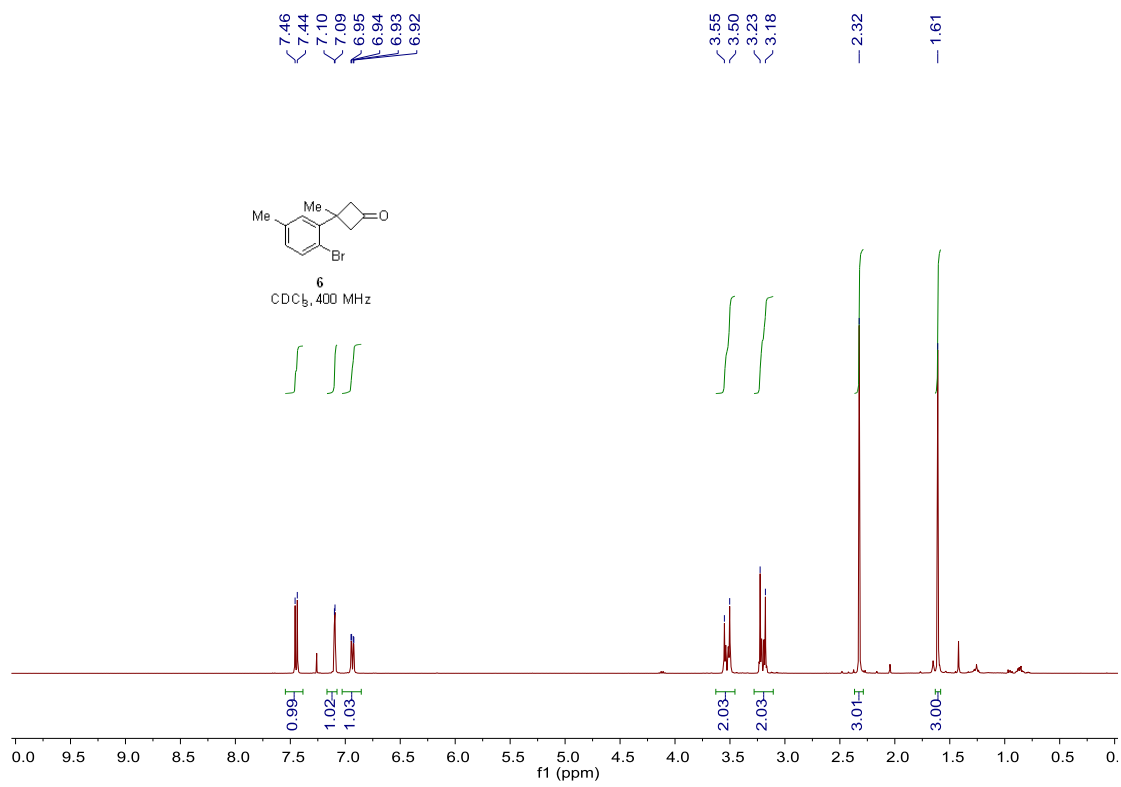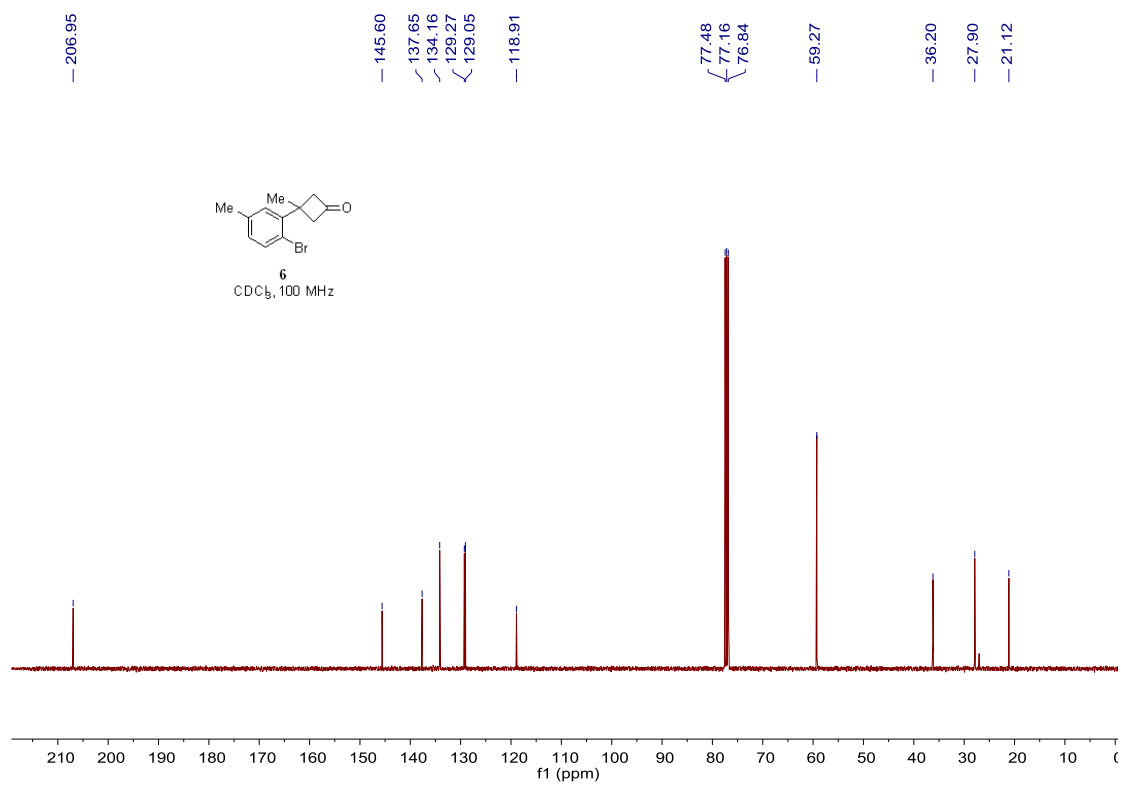

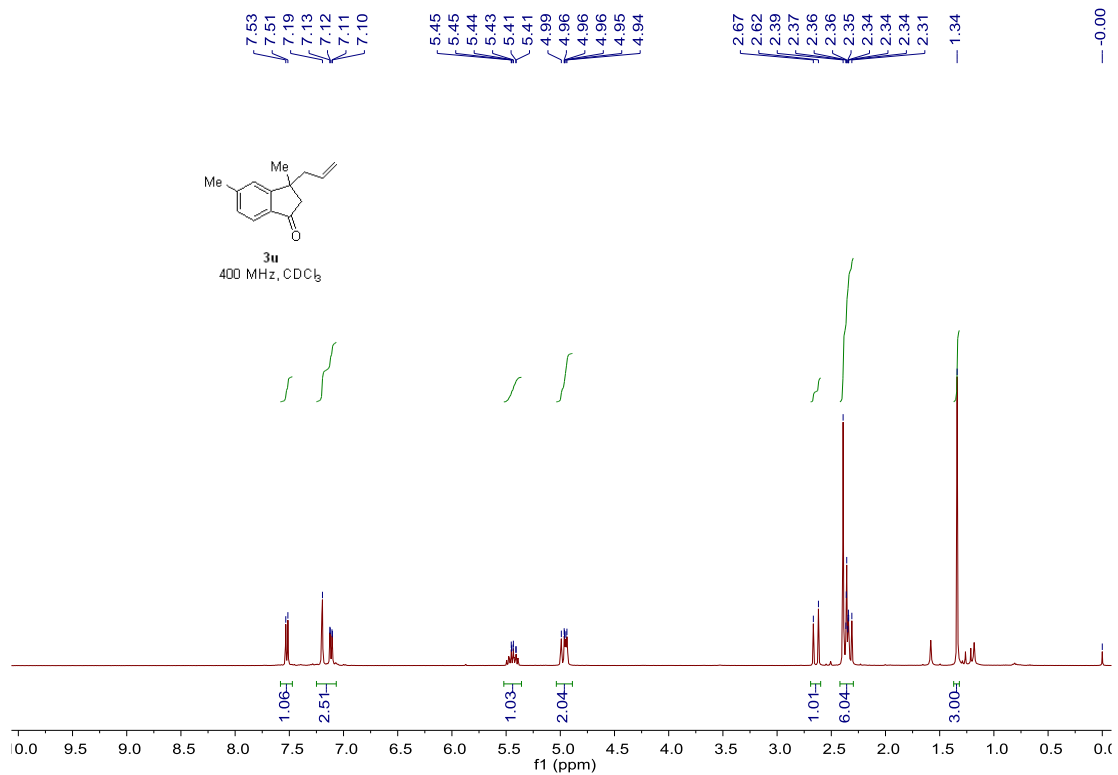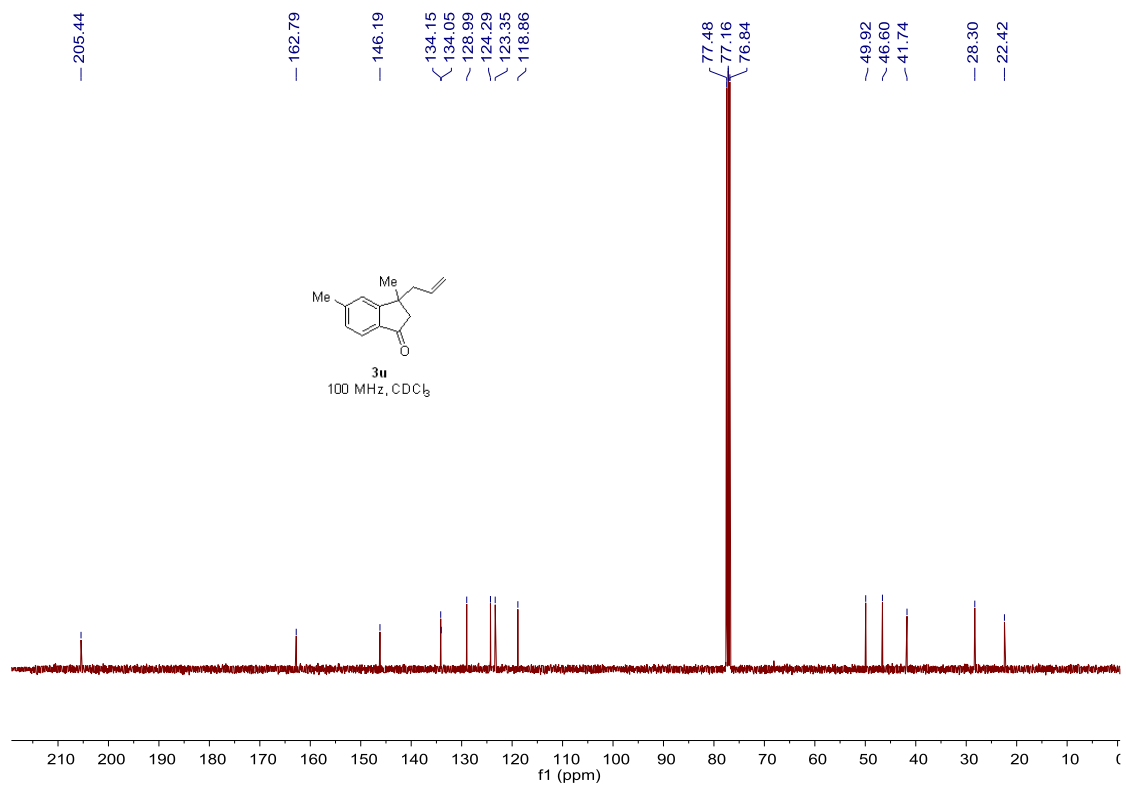

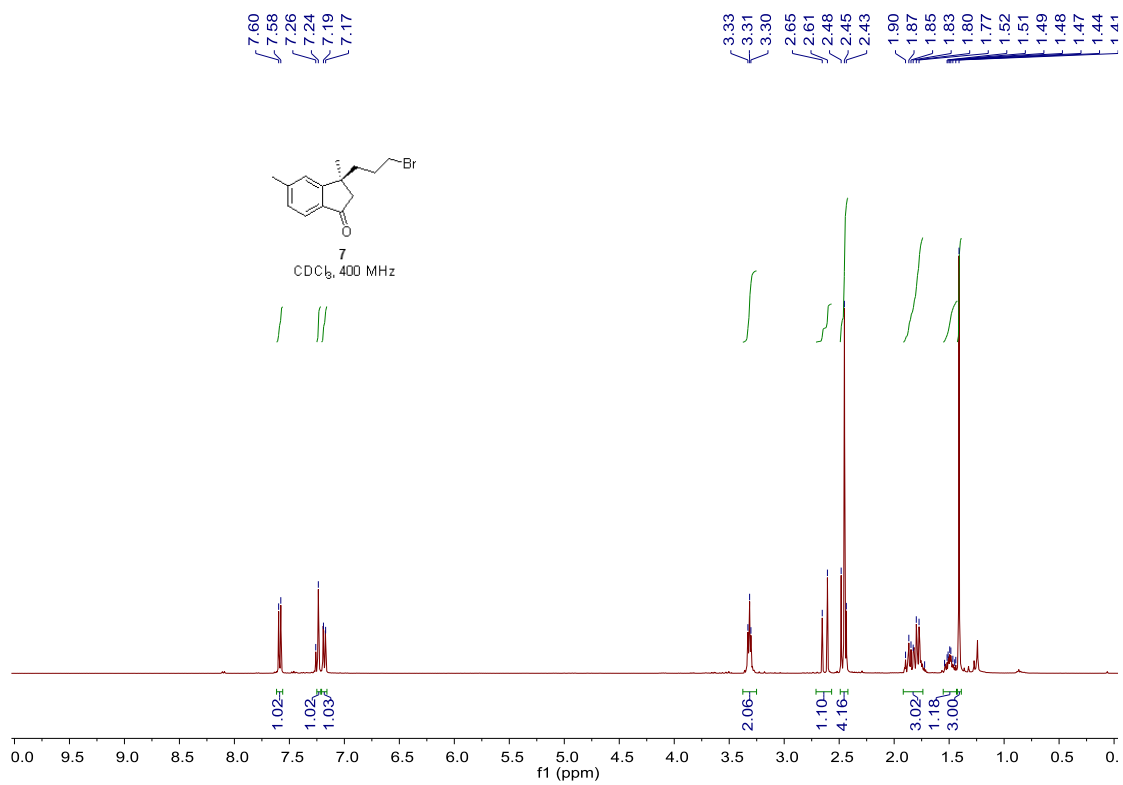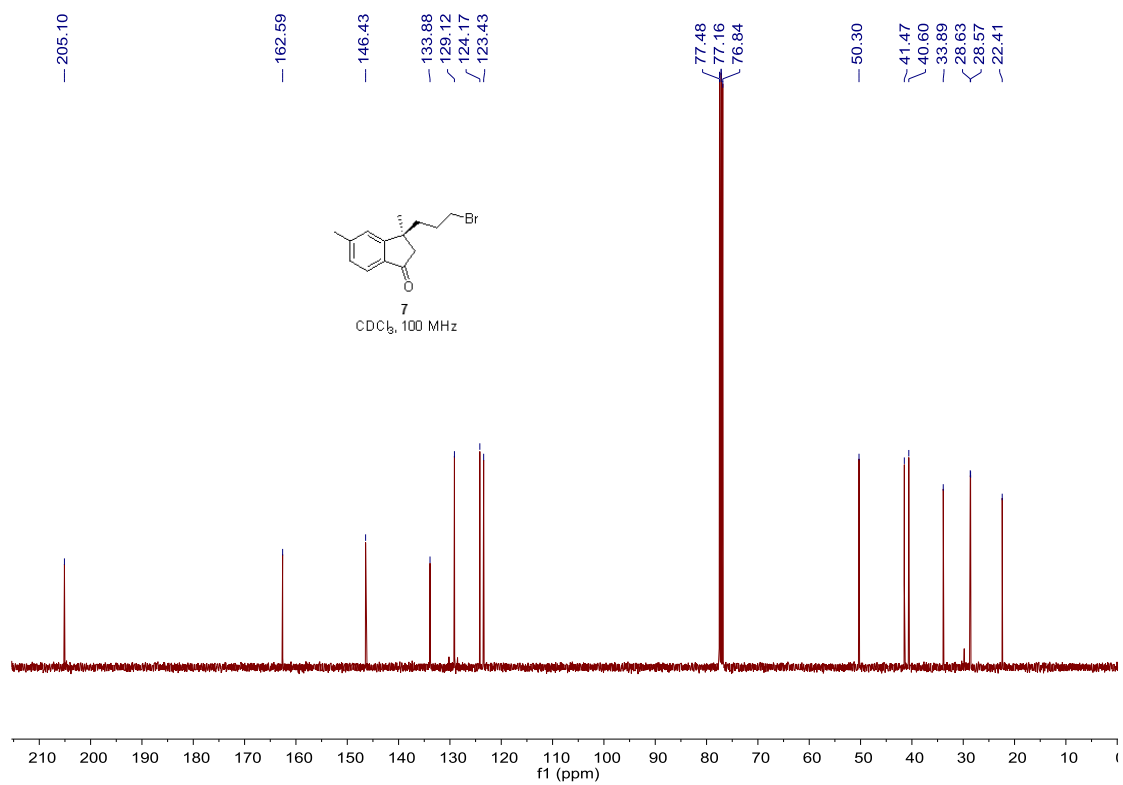

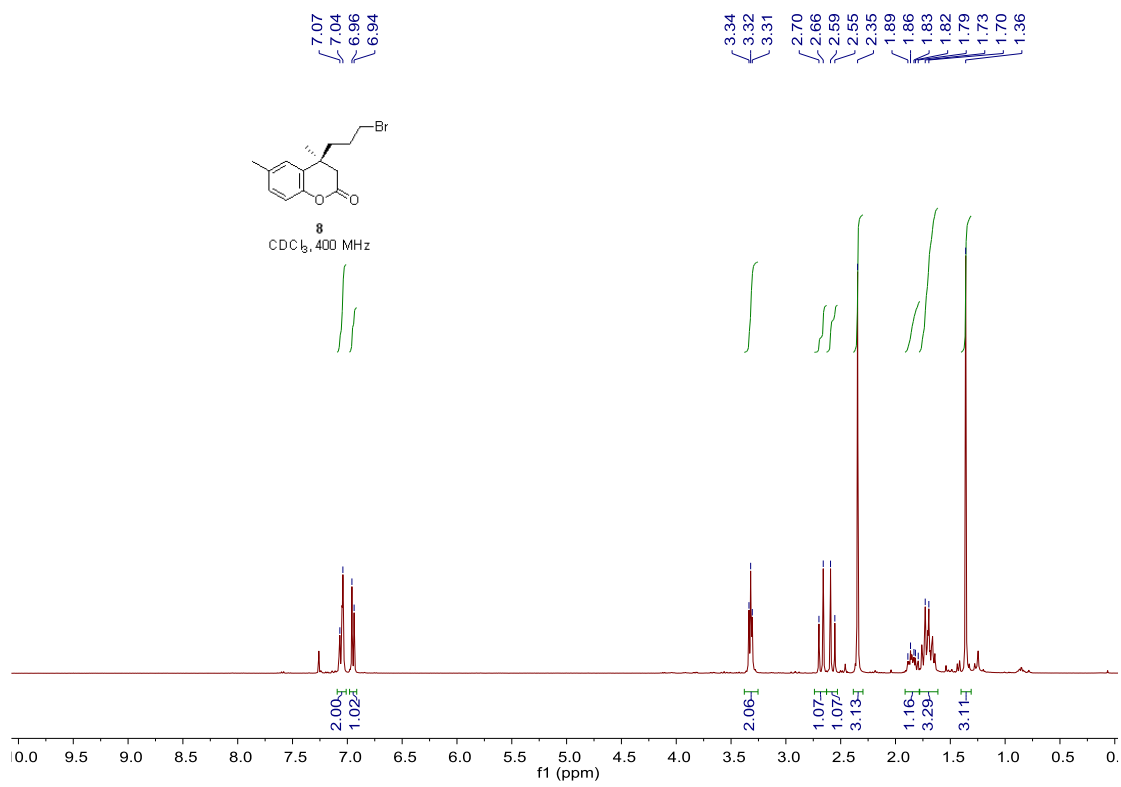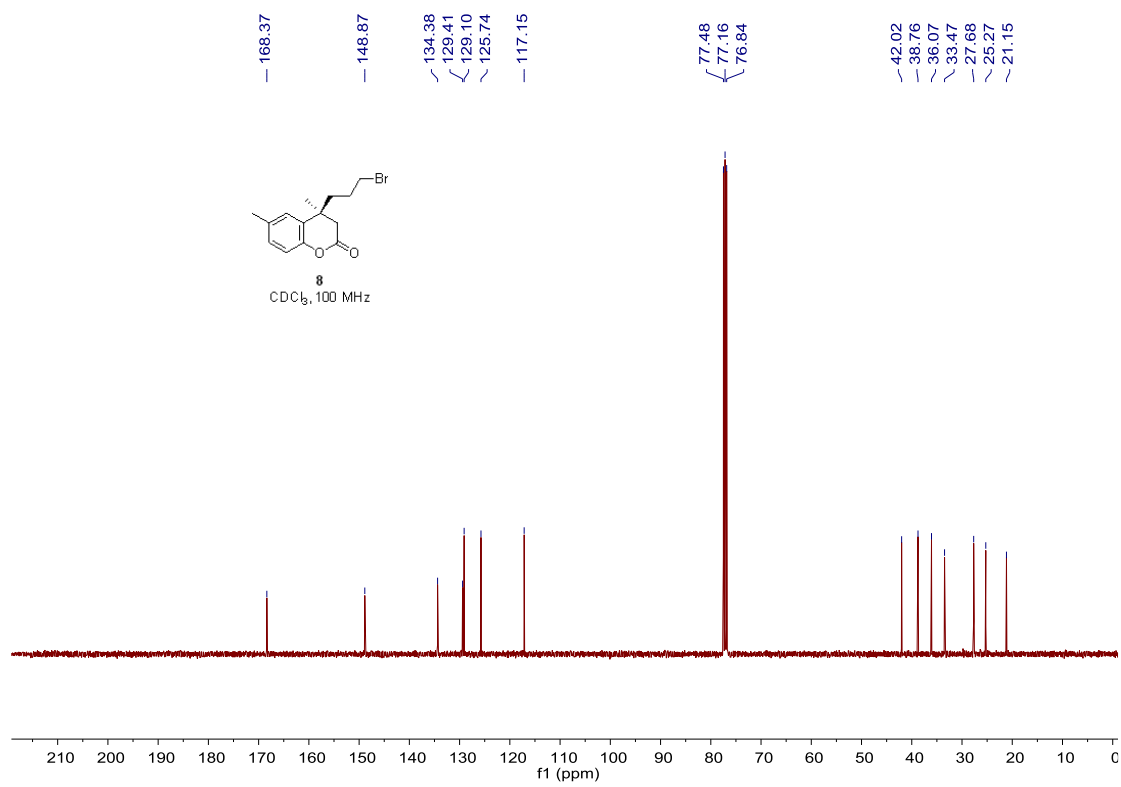

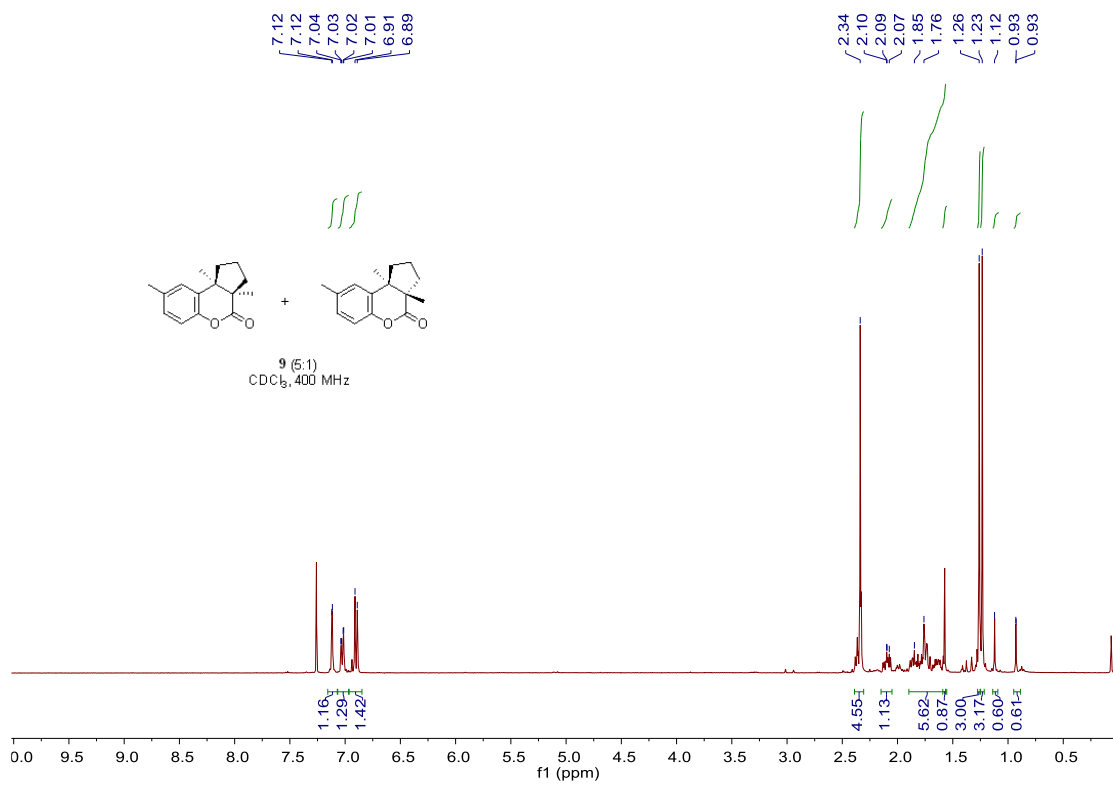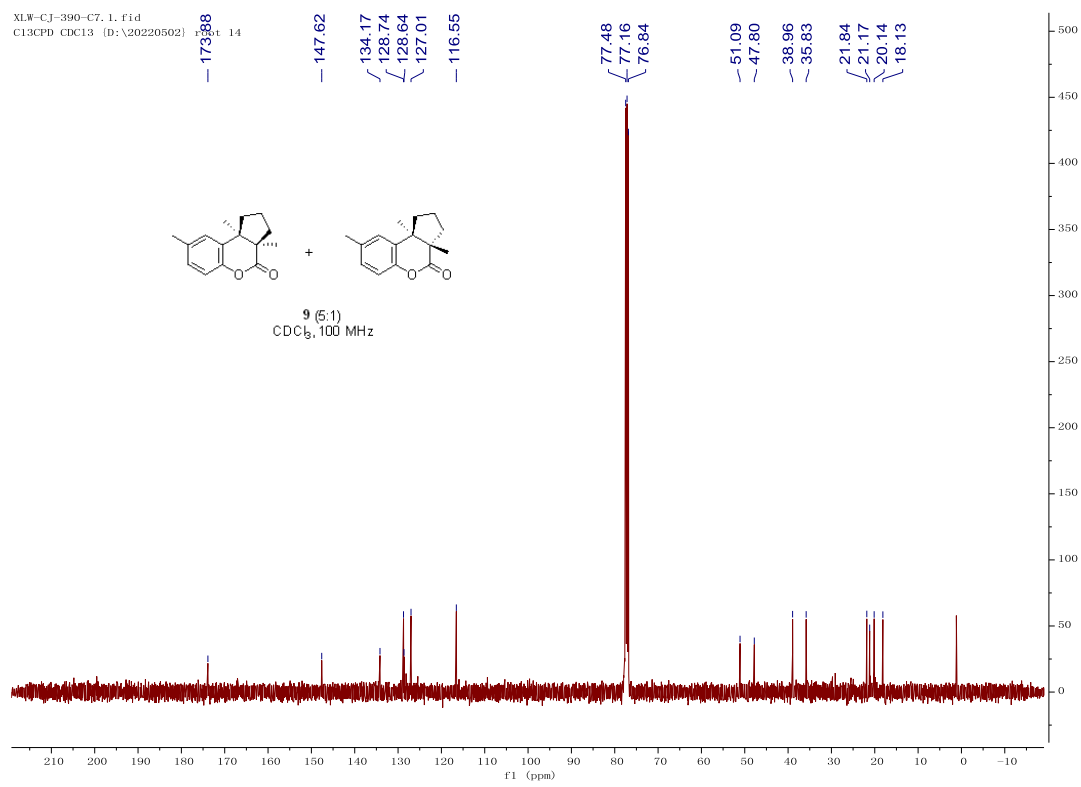

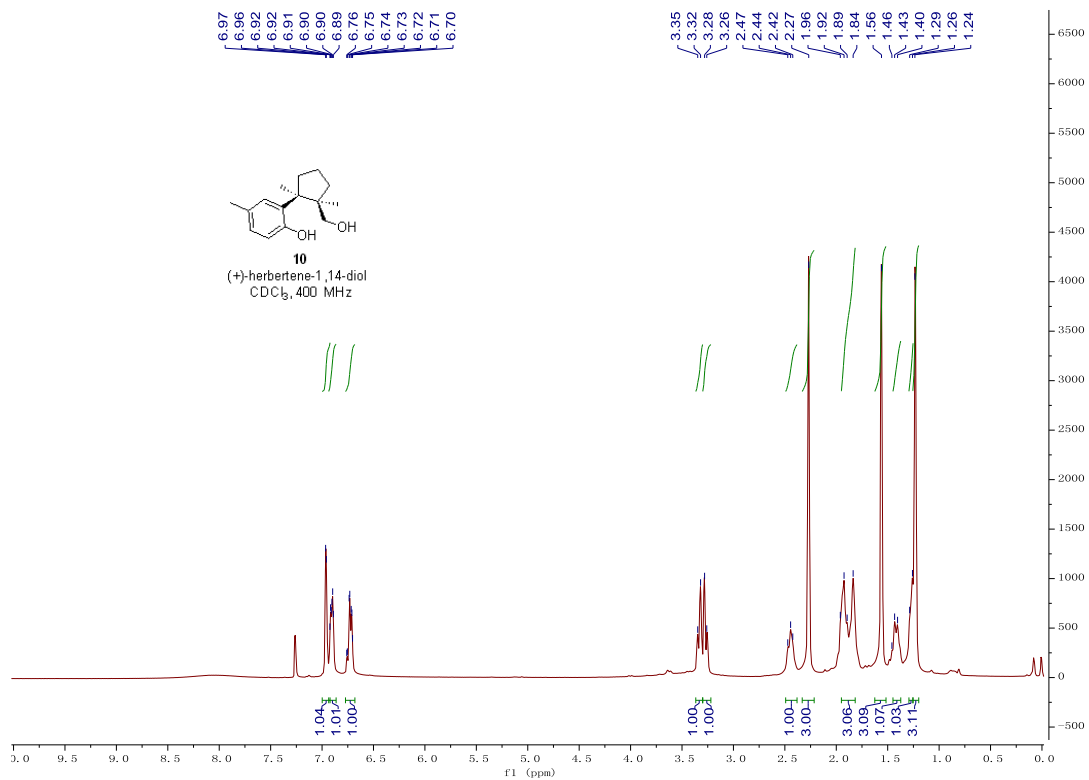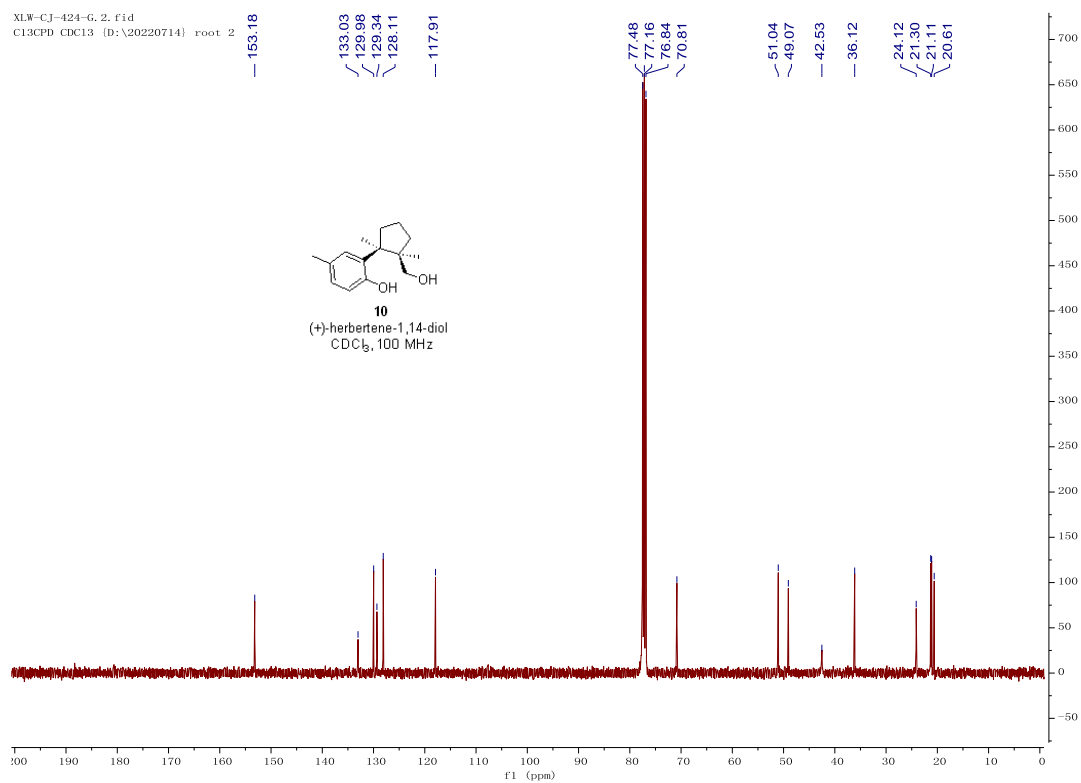

Supplement: d2qo01239a1.pdf [file d2qo01239a1.pdf]
